# Supplementary material for: Modes of inactivation of trichodiene synthase by a cyclopropane-containing farnesyldiphosphate analog
Source: Royal Society of Chemistry journal article supplement (doi:10.1039/b908738a), 2009-01-01
Supplement: b908738a.pdf [file b908738a.pdf]

*Supporting Information for*

**Theoretical Studies on the Mechanism by which a Cyclopropane-Containing Farnesyl diphosphate Analog Inactivates Trichodiene Synthase**

Young J. Hong and Dean J. Tantillo\*

Department of Chemistry, University of California, Davis,  
One Shields Avenue, Davis, CA 95616  
tantillo@chem.ucdavis.edu

Table of Contents

|                                    |               |
|------------------------------------|---------------|
| I. Gaussian03 Reference.....       | Page S2       |
| II. Coordinates and Energies ..... | Page S2 – S58 |
| III. IRC Plots .....               | Page S59 –S69 |
| VI. Reaction Energetics .....      | Page S72 –S78 |
| V. Solvation Calculations .....    | Page S78 –S79 |

## I. Gaussian03 Full Reference

*GAUSSIAN03*, Revision D.01

M. J. Frisch, G. W. Trucks, H. B. Schlegel, G. E. Scuseria,  
M. A. Robb, J. R. Cheeseman, J. A. Montgomery, Jr., T. Vreven,  
K. N. Kudin, J. C. Burant, J. M. Millam, S. S. Iyengar, J. Tomasi,  
V. Barone, B. Mennucci, M. Cossi, G. Scalmani, N. Rega,  
G. A. Petersson, H. Nakatsuji, M. Hada, M. Ehara, K. Toyota,  
R. Fukuda, J. Hasegawa, M. Ishida, T. Nakajima, Y. Honda, O. Kitao,  
H. Nakai, M. Klene, X. Li, J. E. Knox, H. P. Hratchian, J. B. Cross,  
V. Bakken, C. Adamo, J. Jaramillo, R. Gomperts, R. E. Stratmann,  
O. Yazyev, A. J. Austin, R. Cammi, C. Pomelli, J. W. Ochterski,  
P. Y. Ayala, K. Morokuma, G. A. Voth, P. Salvador, J. J. Dannenberg,  
V. G. Zakrzewski, S. Dapprich, A. D. Daniels, M. C. Strain,  
O. Farkas, D. K. Malick, A. D. Rabuck, K. Raghavachari,  
J. B. Foresman, J. V. Ortiz, Q. Cui, A. G. Baboul, S. Clifford,  
J. Cioslowski, B. B. Stefanov, G. Liu, A. Liashenko, P. Piskorz,  
I. Komaromi, R. L. Martin, D. J. Fox, T. Keith, M. A. Al-Laham,  
C. Y. Peng, A. Nanayakkara, M. Challacombe, P. M. W. Gill,  
B. Johnson, W. Chen, M. W. Wong, C. Gonzalez, and J. A. Pople,  
Gaussian, Inc., Wallingford CT, 2004.

## II. Coordinates and energies

**Figure 1a.**

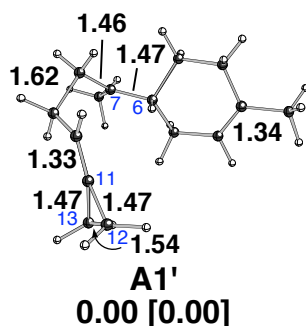

**B3LYP/6-31+G(d,p)//B3LYP/6-31+G(d,p)**

HF = -585.1503162 hartrees (-367181.8234155 kcal/mol)

Imaginary Frequencies: none

Zero-point correction = 0.340540 (Hartree/Particle)

Sum of electronic and thermal Free Energies = -367002.5926 kcal/mol (298 Kelvin,  
1.0 atm)

**mPW1PW91/6-31+G(d,p)//B3LYP/6-31+G(d,p)**

HF = -585.0150423 hartrees (-367096.93904325 kcal/mol)

**mPWB1K/6-31+G(d,p)//B3LYP/6-31+G(d,p)**

HF = -584.8080104 hartrees

Coordinates:

| -----  |        |                         |           |           |
|--------|--------|-------------------------|-----------|-----------|
| Center | Atomic | Coordinates (Angstroms) |           |           |
| Number | Number | X                       | Y         | Z         |
| -----  |        |                         |           |           |
| 1      | 6      | 2.222529                | 0.860546  | 1.076937  |
| 2      | 6      | 2.958019                | 0.842030  | -0.045721 |
| 3      | 6      | 2.709621                | -0.174790 | -1.137908 |
| 4      | 6      | 1.781383                | -1.324901 | -0.730751 |
| 5      | 6      | 0.548713                | -0.725827 | 0.080336  |
| 6      | 6      | 1.085016                | -0.086697 | 1.372598  |
| 7      | 1      | 2.317126                | 0.334326  | -2.029830 |
| 8      | 1      | 2.437055                | 1.602843  | 1.842350  |
| 9      | 1      | 1.446293                | -1.876219 | -1.613584 |
| 10     | 1      | 2.303455                | -2.026940 | -0.071922 |
| 11     | 1      | 3.665479                | -0.618035 | -1.449350 |
| 12     | 6      | -1.385902               | -2.022756 | -0.881537 |
| 13     | 6      | -2.674395               | -1.073272 | -0.612882 |
| 14     | 1      | -1.740117               | -3.055378 | -0.900223 |
| 15     | 1      | -0.987273               | -1.733762 | -1.856953 |
| 16     | 6      | -2.500221               | 0.332026  | -1.088456 |
| 17     | 1      | -3.459009               | -1.579622 | -1.185925 |
| 18     | 1      | -2.965846               | -1.109963 | 0.440312  |
| 19     | 6      | -2.634183               | 1.404268  | -0.309172 |
| 20     | 6      | -0.443862               | -1.794552 | 0.207170  |
| 21     | 6      | -2.705727               | 2.863915  | -0.206855 |
| 22     | 6      | -2.926739               | 1.961292  | 1.021603  |
| 23     | 1      | -2.316394               | 0.470665  | -2.154221 |
| 24     | 1      | 0.119681                | 0.045608  | -0.578430 |
| 25     | 6      | -0.532949               | -2.626958 | 1.424732  |
| 26     | 1      | 0.423278                | -3.159621 | 1.552298  |
| 27     | 1      | -0.623732               | -2.001116 | 2.321771  |
| 28     | 1      | -1.340686               | -3.358269 | 1.388247  |
| 29     | 1      | 1.415465                | -0.861457 | 2.078209  |
| 30     | 1      | 0.273589                | 0.457096  | 1.873249  |
| 31     | 6      | 4.064822                | 1.829119  | -0.306587 |
| 32     | 1      | 5.028657                | 1.317327  | -0.418310 |
| 33     | 1      | 3.889570                | 2.378310  | -1.240458 |
| 34     | 1      | 4.157072                | 2.556414  | 0.503554  |
| 35     | 1      | -2.150718               | 1.955360  | 1.784990  |
| 36     | 1      | -3.937336               | 1.870776  | 1.415104  |
| 37     | 1      | -1.783110               | 3.439338  | -0.250797 |

38 1 -3.569246 3.371656 -0.631132

---

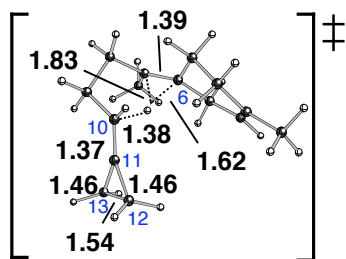

**TS (A1'-to-D')**  
**10.35 [7.50]**

**B3LYP/6-31+G(d,p)//B3LYP/6-31+G(d,p)**

HF = -585.1288238 hartrees (-367168.3369345 kcal/mol)

Imaginary Frequencies: 1 (-735.7701 1/cm)

Zero-point correction = 0.335537 (Hartree/Particle)

Sum of electronic and thermal Free Energies = -366991.0207 kcal/mol (298 Kelvin, 1.0 atm)

**B3LYP/6-31+G(d,p)//B3LYP/6-31+G(d,p):CPCM (solvent=benzene, radii=uaks)**

HF = -585.162798 hartrees (-367195.50737298 kcal/mol)

**mPW1PW91/6-31+G(d,p)//B3LYP/6-31+G(d,p)**

HF = -584.9980942 hartrees (-367086.3041105 kcal/mol)

**mPWB1K/6-31+G(d,p)//B3LYP/6-31+G(d,p)**

HF = -584.7887242 hartrees

Coordinates:

---

| Center Number | Atomic Number | Coordinates (Angstroms) |           |           |
|---------------|---------------|-------------------------|-----------|-----------|
|               |               | X                       | Y         | Z         |
| 1             | 6             | 2.347319                | -0.176749 | 1.183000  |
| 2             | 6             | 2.771994                | 0.292756  | 0.001174  |
| 3             | 6             | 2.067482                | -0.081432 | -1.282862 |
| 4             | 6             | 1.127695                | -1.290267 | -1.133440 |
| 5             | 6             | 0.300060                | -1.277475 | 0.145664  |
| 6             | 6             | 1.150032                | -1.074246 | 1.391502  |
| 7             | 1             | 1.522534                | 0.794116  | -1.667328 |
| 8             | 1             | 2.886845                | 0.090680  | 2.089270  |
| 9             | 1             | 0.515976                | -1.407108 | -2.029254 |
| 10            | 1             | 1.745551                | -2.196747 | -1.062521 |
| 11            | 1             | 2.811081                | -0.313802 | -2.054984 |
| 12            | 6             | -1.916563               | -1.754934 | -0.972143 |
| 13            | 6             | -2.551453               | -0.324362 | -1.084963 |

|    |   |           |           |           |
|----|---|-----------|-----------|-----------|
| 14 | 1 | -2.716227 | -2.488745 | -0.844495 |
| 15 | 1 | -1.392732 | -1.996983 | -1.898110 |
| 16 | 6 | -1.475882 | 0.746505  | -0.949260 |
| 17 | 1 | -3.054824 | -0.225513 | -2.051352 |
| 18 | 1 | -3.307536 | -0.187469 | -0.306064 |
| 19 | 6 | -1.621842 | 1.850816  | -0.154480 |
| 20 | 6 | -1.006987 | -1.740201 | 0.226412  |
| 21 | 6 | -1.120794 | 3.160977  | 0.240270  |
| 22 | 6 | -2.323939 | 2.507862  | 0.944797  |
| 23 | 1 | -0.796636 | 0.863312  | -1.797390 |
| 24 | 1 | -0.638398 | 0.018900  | -0.122123 |
| 25 | 6 | -1.683448 | -2.074403 | 1.526418  |
| 26 | 1 | -1.837648 | -3.162561 | 1.546838  |
| 27 | 1 | -1.115325 | -1.809561 | 2.416348  |
| 28 | 1 | -2.681552 | -1.627228 | 1.590861  |
| 29 | 1 | 1.485582  | -2.063692 | 1.743478  |
| 30 | 1 | 0.547186  | -0.670338 | 2.212011  |
| 31 | 6 | 3.964258  | 1.203373  | -0.130778 |
| 32 | 1 | 4.753869  | 0.728707  | -0.726513 |
| 33 | 1 | 3.696442  | 2.132561  | -0.650227 |
| 34 | 1 | 4.384422  | 1.466461  | 0.843188  |
| 35 | 1 | -2.180547 | 2.134503  | 1.957834  |
| 36 | 1 | -3.322908 | 2.897784  | 0.753500  |
| 37 | 1 | -0.178003 | 3.214808  | 0.783228  |
| 38 | 1 | -1.294738 | 3.998586  | -0.434061 |

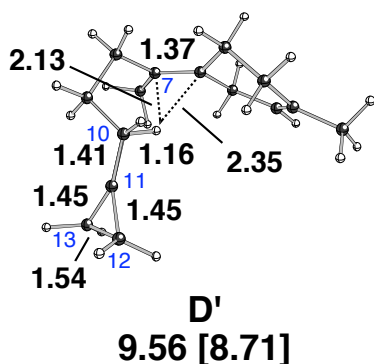

**B3LYP/6-31+G(d,p)//B3LYP/6-31+G(d,p)**

HF = -585.1324871 hartrees (-367170.63565525 kcal/mol)

Imaginary Frequencies: none

Zero-point correction = 0.337949 (Hartree/Particle)

Sum of electronic and thermal Free Energies = -366993.0526 kcal/mol (298 Kelvin, 1.0 atm)

**mPW1PW91/6-31+G(d,p)//B3LYP/6-31+G(d,p)**

HF = -584.9985719 hartrees (-367086.60386725 kcal/mol)

**mPWB1K/6-31+G(d,p)//B3LYP/6-31+G(d,p)**

HF = -584.7894885 hartrees

Coordinates:

| -----  |        |                         |           |           |
|--------|--------|-------------------------|-----------|-----------|
| Center | Atomic | Coordinates (Angstroms) |           |           |
| Number | Number | X                       | Y         | Z         |
| -----  |        |                         |           |           |
| 1      | 6      | 2.740987                | 0.161884  | 1.122575  |
| 2      | 6      | 2.865110                | 0.966694  | 0.057483  |
| 3      | 6      | 2.105559                | 0.681460  | -1.219393 |
| 4      | 6      | 1.577064                | -0.765217 | -1.292796 |
| 5      | 6      | 0.930637                | -1.216043 | -0.005394 |
| 6      | 6      | 1.830572                | -1.042474 | 1.197566  |
| 7      | 1      | 1.279272                | 1.402467  | -1.326059 |
| 8      | 1      | 3.316348                | 0.370008  | 2.022400  |
| 9      | 1      | 0.929035                | -0.887625 | -2.162178 |
| 10     | 1      | 2.441342                | -1.426168 | -1.456526 |
| 11     | 1      | 2.757084                | 0.860944  | -2.083532 |
| 12     | 6      | -1.245599               | -2.009213 | -1.057164 |
| 13     | 6      | -2.424975               | -1.011068 | -0.917891 |
| 14     | 1      | -1.650998               | -3.027224 | -1.058651 |
| 15     | 1      | -0.758928               | -1.861977 | -2.022985 |
| 16     | 6      | -1.844274               | 0.407184  | -0.727371 |
| 17     | 1      | -3.072926               | -1.034648 | -1.799582 |
| 18     | 1      | -3.040256               | -1.268159 | -0.049604 |
| 19     | 6      | -2.601848               | 1.363545  | -0.022280 |
| 20     | 6      | -0.294124               | -1.828194 | 0.101709  |
| 21     | 6      | -2.893830               | 2.760598  | 0.227435  |
| 22     | 6      | -3.599147               | 1.629718  | 0.997980  |
| 23     | 1      | -1.360413               | 0.828125  | -1.615982 |
| 24     | 1      | -0.943577               | 0.197219  | -0.019659 |
| 25     | 6      | -0.783354               | -2.382669 | 1.428550  |
| 26     | 1      | -0.072979               | -3.111832 | 1.834001  |
| 27     | 1      | -0.908728               | -1.610604 | 2.197337  |
| 28     | 1      | -1.742255               | -2.894006 | 1.314861  |
| 29     | 1      | 2.441773                | -1.957460 | 1.298987  |
| 30     | 1      | 1.247282                | -0.996098 | 2.123400  |
| 31     | 6      | 3.757414                | 2.180112  | 0.052235  |
| 32     | 1      | 4.549595                | 2.080607  | -0.700485 |
| 33     | 1      | 3.192301                | 3.085353  | -0.206118 |
| 34     | 1      | 4.229863                | 2.341061  | 1.024599  |
| 35     | 1      | -3.330517               | 1.470717  | 2.043240  |
| 36     | 1      | -4.638710               | 1.388564  | 0.771714  |
| 37     | 1      | -2.148853               | 3.359749  | 0.753148  |

38 1 -3.435904 3.313087 -0.541783

---

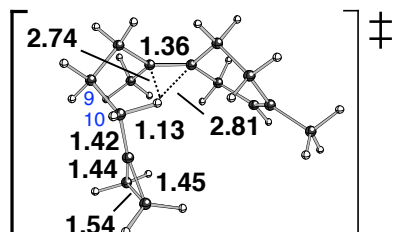

**TS (D'-to-E1')**  
**16.65 [15.51]**

**B3LYP/6-31+G(d,p)//B3LYP/6-31+G(d,p)**

HF = -585.1201734 hartrees (-367162.9088085 kcal/mol)

Imaginary Frequencies: 1 (-362.4992 1/cm)

Zero-point correction = 0.336932 (Hartree/Particle)

Sum of electronic and thermal Free Energies = -366985.8632 kcal/mol (298 Kelvin, 1.0 atm)

**B3LYP/6-31+G(d,p)//B3LYP/6-31+G(d,p):CPCM (solvent=benzene, radii=uaks)**

HF = -585.157436 hartrees (-367192.14266436 kcal/mol)

**mPW1PW91/6-31+G(d,p)//B3LYP/6-31+G(d,p)**

HF = -584.9865568 hartrees (-367079.064392 kcal/mol)

**mPWB1K/6-31+G(d,p)//B3LYP/6-31+G(d,p)**

HF = -584.7820744 hartrees

Coordinates:

---

| Center Number | Atomic Number | Coordinates (Angstroms) |           |           |
|---------------|---------------|-------------------------|-----------|-----------|
|               |               | X                       | Y         | Z         |
| 1             | 6             | 2.493650                | -0.222941 | 1.076748  |
| 2             | 6             | 2.716522                | 0.442791  | -0.069060 |
| 3             | 6             | 1.959603                | 0.084389  | -1.328070 |
| 4             | 6             | 1.222010                | -1.264116 | -1.221220 |
| 5             | 6             | 0.493145                | -1.412645 | 0.101409  |
| 6             | 6             | 1.470257                | -1.323253 | 1.259953  |
| 7             | 1             | 1.252999                | 0.899489  | -1.577458 |
| 8             | 1             | 3.089988                | 0.020413  | 1.954886  |
| 9             | 1             | 0.578286                | -1.406924 | -2.091426 |
| 10            | 1             | 1.977881                | -2.060461 | -1.269938 |
| 11            | 1             | 2.652512                | 0.055799  | -2.179155 |
| 12            | 6             | -1.803398               | -1.688885 | -0.927577 |
| 13            | 6             | -2.715482               | -0.437671 | -1.029998 |

|    |   |           |           |           |
|----|---|-----------|-----------|-----------|
| 14 | 1 | -2.464195 | -2.557435 | -0.819537 |
| 15 | 1 | -1.286397 | -1.820630 | -1.880535 |
| 16 | 6 | -1.937262 | 0.884767  | -1.178463 |
| 17 | 1 | -3.369941 | -0.537613 | -1.901261 |
| 18 | 1 | -3.368886 | -0.373849 | -0.154398 |
| 19 | 6 | -1.815138 | 1.759566  | -0.063181 |
| 20 | 6 | -0.835970 | -1.637162 | 0.243963  |
| 21 | 6 | -1.433221 | 3.067110  | 0.424853  |
| 22 | 6 | -1.945049 | 1.957013  | 1.360628  |
| 23 | 1 | -2.095836 | 1.446581  | -2.109460 |
| 24 | 1 | -0.823975 | 0.675709  | -1.230378 |
| 25 | 6 | -1.509362 | -1.919239 | 1.572774  |
| 26 | 1 | -1.826694 | -2.969426 | 1.611752  |
| 27 | 1 | -0.873233 | -1.745625 | 2.440536  |
| 28 | 1 | -2.422477 | -1.324383 | 1.705086  |
| 29 | 1 | 1.996724  | -2.286492 | 1.368829  |
| 30 | 1 | 0.960434  | -1.170483 | 2.215243  |
| 31 | 6 | 3.741664  | 1.540949  | -0.186832 |
| 32 | 1 | 4.529908  | 1.266212  | -0.899074 |
| 33 | 1 | 3.292479  | 2.469117  | -0.566058 |
| 34 | 1 | 4.214727  | 1.760795  | 0.773818  |
| 35 | 1 | -1.224968 | 1.459535  | 2.011848  |
| 36 | 1 | -2.957404 | 1.992559  | 1.769075  |
| 37 | 1 | -0.370971 | 3.313935  | 0.458743  |
| 38 | 1 | -2.072771 | 3.909146  | 0.153301  |

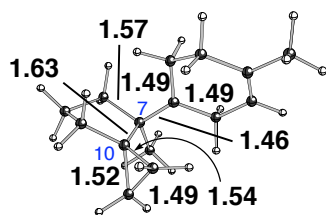

**E1'**  
**-16.86 [-24.13]**

**B3LYP/6-31+G(d,p)//B3LYP/6-31+G(d,p)**

HF = -585.1808397 hartrees (-367200.97691175 kcal/mol)

Imaginary Frequencies: none

Zero-point correction = 0.344202 (Hartree/Particle)

Sum of electronic and thermal Free Energies = -367016.4016 kcal/mol (298 Kelvin, 1.0 atm)

**mPW1PW91/6-31+G(d,p)//B3LYP/6-31+G(d,p)**

HF = -585.057159 hartrees (-367123.3672725 kcal/mol)



**mPWB1K/6-31+G(d,p)//B3LYP/6-31+G(d,p)**

HF = -584.8573229 hartrees

Coordinates:

| Center<br>Number | Atomic<br>Number | Coordinates (Angstroms) |           |           |
|------------------|------------------|-------------------------|-----------|-----------|
|                  |                  | X                       | Y         | Z         |
| 1                | 6                | -2.530180               | 1.103447  | -0.201102 |
| 2                | 6                | -2.984085               | -0.143039 | -0.012799 |
| 3                | 6                | -2.053716               | -1.323340 | -0.174244 |
| 4                | 6                | -0.801089               | -0.998781 | -1.011673 |
| 5                | 6                | -0.159062               | 0.304545  | -0.704572 |
| 6                | 6                | -1.098269               | 1.444438  | -0.525848 |
| 7                | 1                | -1.755251               | -1.703707 | 0.812213  |
| 8                | 1                | -3.197642               | 1.954127  | -0.092220 |
| 9                | 1                | -0.096468               | -1.829039 | -1.020865 |
| 10               | 1                | -1.120331               | -0.859092 | -2.063402 |
| 11               | 1                | -2.579213               | -2.150531 | -0.663607 |
| 12               | 6                | 2.172918                | -0.492572 | -1.486215 |
| 13               | 6                | 3.008637                | -1.287379 | -0.465978 |
| 14               | 1                | 2.792686                | 0.071611  | -2.187229 |
| 15               | 1                | 1.560830                | -1.167904 | -2.088551 |
| 16               | 6                | 2.071689                | -1.439316 | 0.735707  |
| 17               | 1                | 3.349795                | -2.244759 | -0.868150 |
| 18               | 1                | 3.898844                | -0.717685 | -0.177377 |
| 19               | 6                | 1.380163                | -0.081743 | 0.854104  |
| 20               | 6                | 1.286787                | 0.505229  | -0.665666 |
| 21               | 6                | 0.437041                | 0.161690  | 2.051282  |
| 22               | 6                | 1.753560                | 0.857346  | 1.994120  |
| 23               | 1                | 2.590698                | -1.681627 | 1.668608  |
| 24               | 1                | 1.343559                | -2.242155 | 0.566865  |
| 25               | 6                | 1.794707                | 1.941574  | -0.834782 |
| 26               | 1                | 1.664021                | 2.259236  | -1.874407 |
| 27               | 1                | 1.301259                | 2.675693  | -0.196401 |
| 28               | 1                | 2.863515                | 1.973787  | -0.609466 |
| 29               | 1                | -1.031184               | 1.980298  | -1.495627 |
| 30               | 1                | -0.691940               | 2.179768  | 0.178713  |
| 31               | 6                | -4.404198               | -0.448594 | 0.375779  |
| 32               | 1                | -4.895982               | -1.058414 | -0.391848 |
| 33               | 1                | -4.437291               | -1.027225 | 1.307486  |
| 34               | 1                | -4.990529               | 0.461907  | 0.519044  |
| 35               | 1                | 1.757920                | 1.926995  | 1.818778  |
| 36               | 1                | 2.564339                | 0.507884  | 2.628029  |
| 37               | 1                | -0.460439               | 0.760490  | 1.946578  |

38 1 0.319382 -0.690702 2.714171

---

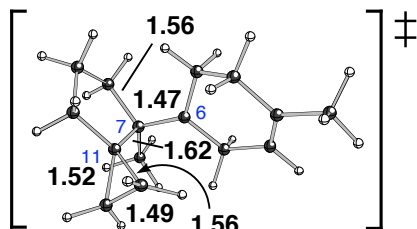

**TS (E1'-to-E2')**  
**-14.18 [-21.38]**

**B3LYP/6-31+G(d,p)//B3LYP/6-31+G(d,p)**

HF = -585.1763018 hartrees (-367198.1293795 kcal/mol)

Imaginary Frequencies: 1 (-67.2164 1/cm)

Zero-point correction = 0.343934 (Hartree/Particle)

Sum of electronic and thermal Free Energies = -367013.1837 kcal/mol (298 Kelvin, 1.0 atm)

**mPW1PW91/6-31+G(d,p)//B3LYP/6-31+G(d,p)**

HF = -585.0525061 hartrees (-367120.44757775 kcal/mol)

**mPWB1K/6-31+G(d,p)//B3LYP/6-31+G(d,p)**

HF = -584.8521499 hartrees

Coordinates:

---

| Center Number | Atomic Number | Coordinates (Angstroms) |           |           |
|---------------|---------------|-------------------------|-----------|-----------|
|               |               | X                       | Y         | Z         |
| 1             | 6             | -0.104517               | 0.176917  | -0.753484 |
| 2             | 6             | 1.842686                | 1.748574  | -1.246130 |
| 3             | 1             | 2.887708                | 1.880400  | -0.956909 |
| 4             | 1             | 1.794671                | 1.772374  | -2.340044 |
| 5             | 1             | 1.286434                | 2.607838  | -0.869236 |
| 6             | 6             | 1.344135                | 0.389786  | -0.737353 |
| 7             | 6             | 2.224880                | -0.762885 | -1.310724 |
| 8             | 6             | 1.427682                | 0.174216  | 0.862024  |
| 9             | 6             | 2.428839                | -1.841079 | -0.230185 |
| 10            | 1             | 3.186277                | -0.317700 | -1.580425 |
| 11            | 1             | 1.801848                | -1.163094 | -2.237896 |
| 12            | 6             | 2.174189                | -1.150307 | 1.123615  |
| 13            | 1             | 1.751068                | -2.687304 | -0.371108 |
| 14            | 1             | 3.438394                | -2.256557 | -0.283726 |
| 15            | 6             | -1.052256               | 1.322227  | -0.821643 |

---

|    |   |           |           |           |
|----|---|-----------|-----------|-----------|
| 16 | 6 | -0.744357 | -1.160503 | -0.820886 |
| 17 | 6 | -2.479732 | 1.044892  | -0.421144 |
| 18 | 6 | -1.992277 | -1.330035 | 0.070785  |
| 19 | 6 | -2.924268 | -0.141905 | 0.014495  |
| 20 | 1 | 1.622336  | -1.796601 | 1.812186  |
| 21 | 1 | -0.040452 | -1.978219 | -0.691967 |
| 22 | 1 | -1.080147 | -1.199458 | -1.875994 |
| 23 | 1 | -2.517624 | -2.234290 | -0.255198 |
| 24 | 1 | -1.686594 | -1.521265 | 1.108540  |
| 25 | 1 | -3.150950 | 1.897994  | -0.472295 |
| 26 | 1 | -0.653414 | 2.198010  | -0.297825 |
| 27 | 1 | -0.994176 | 1.629932  | -1.886779 |
| 28 | 6 | -4.336799 | -0.366980 | 0.479436  |
| 29 | 1 | -4.924648 | 0.553234  | 0.450453  |
| 30 | 1 | -4.838467 | -1.116954 | -0.144003 |
| 31 | 1 | -4.351315 | -0.750513 | 1.507387  |
| 32 | 6 | 0.405707  | 0.641475  | 1.939902  |
| 33 | 6 | 1.689308  | 1.370947  | 1.765279  |
| 34 | 1 | 3.123794  | -0.907167 | 1.613191  |
| 35 | 1 | 1.658235  | 2.368854  | 1.341343  |
| 36 | 1 | 2.480486  | 1.223182  | 2.496012  |
| 37 | 1 | -0.514532 | 1.147060  | 1.672989  |
| 38 | 1 | 0.301750  | -0.041798 | 2.777379  |

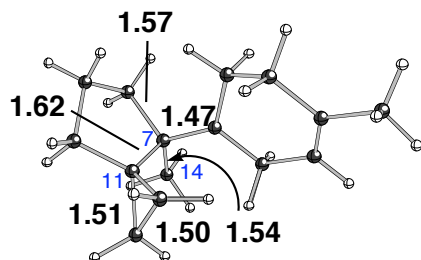

**E2'**  
**-15.04 [-22.06]**

**B3LYP/6-31+G(d,p)//B3LYP/6-31+G(d,p)**

HF = -585.177527 hartrees (-367198.8981925 kcal/mol)

Imaginary Frequencies: none

Zero-point correction = 0.343787 (Hartree/Particle)

Sum of electronic and thermal Free Energies = -367014.6088 kcal/mol (298 Kelvin, 1.0 atm)

**mPW1PW91/6-31+G(d,p)//B3LYP/6-31+G(d,p)**

HF = -585.0534437 hartrees (-367121.03592175 kcal/mol)

**mPWB1K/6-31+G(d,p)//B3LYP/6-31+G(d,p)**

HF = -584.8540332 hartrees

Coordinates:

| -----  |        |                         |           |           |
|--------|--------|-------------------------|-----------|-----------|
| Center | Atomic | Coordinates (Angstroms) |           |           |
| Number | Number | X                       | Y         | Z         |
| -----  |        |                         |           |           |
| 1      | 6      | 0.169545                | -0.045590 | -0.741475 |
| 2      | 6      | -1.776709               | -1.462382 | -1.574613 |
| 3      | 1      | -2.840210               | -1.611358 | -1.374403 |
| 4      | 1      | -1.659876               | -1.298498 | -2.651338 |
| 5      | 1      | -1.264163               | -2.389164 | -1.313048 |
| 6      | 6      | -1.287443               | -0.230548 | -0.793655 |
| 7      | 6      | -2.095505               | 1.047942  | -1.209192 |
| 8      | 6      | -1.566317               | -0.352137 | 0.797789  |
| 9      | 6      | -2.501887               | 1.792549  | 0.073754  |
| 10     | 1      | -2.991944               | 0.701301  | -1.731014 |
| 11     | 1      | -1.549130               | 1.670995  | -1.923679 |
| 12     | 6      | -2.670176               | 0.671776  | 1.101886  |
| 13     | 1      | -1.730084               | 2.498242  | 0.399303  |
| 14     | 1      | -3.418047               | 2.371782  | -0.068405 |
| 15     | 6      | 1.090935                | -1.193372 | -0.908487 |
| 16     | 6      | 0.819981                | 1.275601  | -0.611781 |
| 17     | 6      | 2.526750                | -0.987200 | -0.500214 |
| 18     | 6      | 2.075952                | 1.315481  | 0.283244  |
| 19     | 6      | 2.992941                | 0.132825  | 0.069563  |
| 20     | 1      | -2.622608               | 1.021079  | 2.137069  |
| 21     | 1      | 0.120178                | 2.073780  | -0.374639 |
| 22     | 1      | 1.153635                | 1.452294  | -1.656153 |
| 23     | 1      | 2.608876                | 2.247628  | 0.067438  |
| 24     | 1      | 1.780623                | 1.380277  | 1.339191  |
| 25     | 1      | 3.182824                | -1.838476 | -0.659692 |
| 26     | 1      | 0.663582                | -2.096173 | -0.452403 |
| 27     | 1      | 1.013570                | -1.422944 | -1.992542 |
| 28     | 6      | 4.412336                | 0.282607  | 0.542002  |
| 29     | 1      | 4.986735                | -0.635091 | 0.397014  |
| 30     | 1      | 4.918107                | 1.095286  | 0.006712  |
| 31     | 1      | 4.441624                | 0.540502  | 1.608029  |
| 32     | 6      | -0.529118               | -0.657843 | 1.897067  |
| 33     | 6      | -1.558356               | -1.678080 | 1.510247  |
| 34     | 1      | -3.642715               | 0.182491  | 0.962881  |
| 35     | 1      | -1.221502               | -2.570653 | 0.991461  |
| 36     | 1      | -2.396829               | -1.855596 | 2.179620  |
| 37     | 1      | 0.507293                | -0.882310 | 1.668896  |
| 38     | 1      | -0.657509               | -0.105174 | 2.822898  |

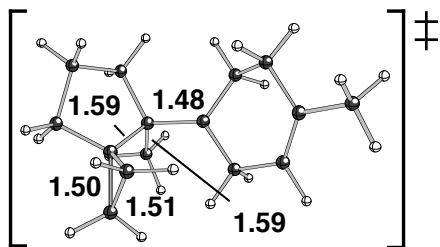

**TS (E2'-to-E3')**  
**-7.25 [-13.59]**

**B3LYP/6-31+G(d,p)//B3LYP/6-31+G(d,p)**

HF = -585.1652451 hartrees (-367191.19130025 kcal/mol)

Imaginary Frequencies: 1 (-87.5288 1/cm)

Zero-point correction = 0.343920 (Hartree/Particle)

Sum of electronic and thermal Free Energies = -367006.6746 kcal/mol (298 Kelvin,  
1.0 atm)

**mPW1PW91/6-31+G(d,p)//B3LYP/6-31+G(d,p)**

HF = -585.0400811 hartrees (-367112.65089025 kcal/mol)

**mPWB1K/6-31+G(d,p)//B3LYP/6-31+G(d,p)**

HF = -584.8393137 hartrees

Coordinates:

| Center Number | Atomic Number | Coordinates (Angstroms) |           |           |
|---------------|---------------|-------------------------|-----------|-----------|
|               |               | X                       | Y         | Z         |
| 1             | 6             | 0.330045                | -0.472888 | 0.720765  |
| 2             | 6             | -1.656942               | -0.347155 | 2.037021  |
| 3             | 1             | -2.746953               | -0.314641 | 1.976199  |
| 4             | 1             | -1.372123               | -1.229396 | 2.617266  |
| 5             | 1             | -1.310323               | 0.554950  | 2.541804  |
| 6             | 6             | -1.134942               | -0.441319 | 0.534282  |
| 7             | 6             | -1.787968               | -1.695558 | -0.155495 |
| 8             | 6             | -1.718473               | 0.791083  | -0.280609 |
| 9             | 6             | -2.599678               | -1.173100 | -1.355135 |
| 10            | 1             | -2.449716               | -2.185783 | 0.564919  |
| 11            | 1             | -1.067766               | -2.451117 | -0.466961 |
| 12            | 6             | -2.986709               | 0.244803  | -0.934893 |
| 13            | 1             | -1.974738               | -1.138103 | -2.254924 |
| 14            | 1             | -3.459033               | -1.810819 | -1.576691 |
| 15            | 6             | 1.080363                | 0.669625  | 1.298587  |

|    |   |           |           |           |
|----|---|-----------|-----------|-----------|
| 16 | 6 | 1.201087  | -1.622841 | 0.421824  |
| 17 | 6 | 2.448750  | 0.884796  | 0.664989  |
| 18 | 6 | 2.230524  | -1.171607 | -0.679357 |
| 19 | 6 | 2.967921  | 0.080496  | -0.270956 |
| 20 | 1 | -3.309058 | 0.877079  | -1.767108 |
| 21 | 1 | 0.675211  | -2.523613 | 0.119943  |
| 22 | 1 | 1.805195  | -1.836887 | 1.314304  |
| 23 | 1 | 2.921471  | -2.012570 | -0.802113 |
| 24 | 1 | 1.734507  | -1.039135 | -1.650020 |
| 25 | 1 | 2.968209  | 1.780979  | 0.991591  |
| 26 | 1 | 0.499433  | 1.591098  | 1.312467  |
| 27 | 1 | 1.218899  | 0.399022  | 2.364622  |
| 28 | 6 | 4.274410  | 0.359380  | -0.965357 |
| 29 | 1 | 4.708658  | 1.306668  | -0.638938 |
| 30 | 1 | 4.999790  | -0.439150 | -0.769975 |
| 31 | 1 | 4.134413  | 0.403532  | -2.052376 |
| 32 | 6 | -0.876442 | 1.768654  | -1.075679 |
| 33 | 6 | -1.676035 | 2.238759  | 0.121257  |
| 34 | 1 | -3.809304 | 0.220085  | -0.207989 |
| 35 | 1 | -1.144102 | 2.559040  | 1.012153  |
| 36 | 1 | -2.578622 | 2.816962  | -0.057820 |
| 37 | 1 | 0.206065  | 1.758423  | -0.988654 |
| 38 | 1 | -1.225573 | 2.034606  | -2.069162 |

---

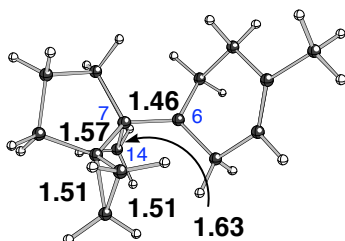

**E3'**  
**-8.67 [-15.28]**

**B3LYP/6-31+G(d,p)//B3LYP/6-31+G(d,p)**

HF = -585.1683217 hartrees (-367193.12186675 kcal/mol)

Imaginary Frequencies: none

Zero-point correction = 0.344725 (Hartree/Particle)

Sum of electronic and thermal Free Energies = -367008.8545 kcal/mol (298 Kelvin, 1.0 atm)

**mPW1PW91/6-31+G(d,p)//B3LYP/6-31+G(d,p)**

HF = -585.0435825 hartrees (-367114.84801875 kcal/mol)

**mPWB1K/6-31+G(d,p)//B3LYP/6-31+G(d,p)**

HF = -584.8432805 hartrees

Coordinates:

| -----  |        |                         |           |           |
|--------|--------|-------------------------|-----------|-----------|
| Center | Atomic | Coordinates (Angstroms) |           |           |
| Number | Number | X                       | Y         | Z         |
| -----  |        |                         |           |           |
| 1      | 6      | 0.409513                | -0.340705 | 0.809188  |
| 2      | 6      | -1.499841               | -0.819036 | 1.875509  |
| 3      | 1      | -1.051221               | -1.726960 | 2.283126  |
| 4      | 1      | -1.378463               | 0.014690  | 2.567987  |
| 5      | 6      | -0.974988               | -0.463815 | 0.374795  |
| 6      | 6      | -1.296339               | -1.669410 | -0.582061 |
| 7      | 6      | -1.824209               | 0.712418  | -0.172714 |
| 8      | 6      | -2.441662               | -1.195056 | -1.509966 |
| 9      | 1      | -1.587935               | -2.549739 | -0.001539 |
| 10     | 1      | -0.420464               | -1.953015 | -1.170179 |
| 11     | 6      | -3.033924               | 0.037692  | -0.815724 |
| 12     | 1      | -2.034382               | -0.909711 | -2.484959 |
| 13     | 1      | -3.177917               | -1.983620 | -1.683404 |
| 14     | 6      | -1.229887               | 1.920677  | -0.868106 |
| 15     | 6      | -1.990270               | 2.083666  | 0.430022  |
| 16     | 6      | 1.058772                | 0.895115  | 1.308816  |
| 17     | 6      | 1.330674                | -1.502899 | 0.803721  |
| 18     | 6      | 2.252341                | 1.147459  | 0.369255  |
| 19     | 6      | 2.387808                | -1.233876 | -0.328260 |
| 20     | 6      | 2.867016                | 0.196286  | -0.348589 |
| 21     | 1      | -3.551959               | 0.710706  | -1.504016 |
| 22     | 1      | 0.832871                | -2.455755 | 0.629108  |
| 23     | 1      | 1.873156                | -1.544658 | 1.754247  |
| 24     | 1      | 3.222271                | -1.926413 | -0.170146 |
| 25     | 1      | 1.955548                | -1.493219 | -1.302740 |
| 26     | 1      | 2.572459                | 2.184605  | 0.318292  |
| 27     | 1      | 0.399891                | 1.758772  | 1.316776  |
| 28     | 1      | 1.426949                | 0.741315  | 2.333436  |
| 29     | 6      | 4.057709                | 0.487397  | -1.223562 |
| 30     | 1      | 4.317670                | 1.547821  | -1.215238 |
| 31     | 1      | 4.931672                | -0.083319 | -0.887342 |
| 32     | 1      | 3.862932                | 0.188432  | -2.260499 |
| 33     | 1      | -3.764931               | -0.254502 | -0.050042 |
| 34     | 1      | -2.567920               | -0.999070 | 1.728664  |
| 35     | 1      | -0.154343               | 2.067723  | -0.859156 |
| 36     | 1      | -1.704305               | 2.248607  | -1.788423 |
| 37     | 1      | -1.449988               | 2.370317  | 1.326707  |
| 38     | 1      | -2.987866               | 2.511525  | 0.385392  |

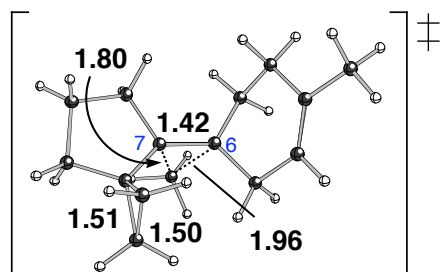

**TS (E3'-to-F')**  
**-7.33 [-14.77]**

**B3LYP/6-31+G(d,p)//B3LYP/6-31+G(d,p)**

HF = -585.1654003 hartrees (-367191.28868825 kcal/mol)

Imaginary Frequencies: 1 (-285.4130 1/cm)

Zero-point correction = 0.343936 (Hartree/Particle)

Sum of electronic and thermal Free Energies = -367007.1245 kcal/mol (298 Kelvin, 1.0 atm)

**mPW1PW91/6-31+G(d,p)//B3LYP/6-31+G(d,p)**

HF = -585.0419701 hartrees (-367113.83623775 kcal/mol)

**mPWB1K/6-31+G(d,p)//B3LYP/6-31+G(d,p)**

HF = -584.8423459 hartrees

Coordinates:

| Center Number | Atomic Number | Coordinates (Angstroms) |           |           |
|---------------|---------------|-------------------------|-----------|-----------|
|               |               | X                       | Y         | Z         |
| 1             | 6             | 0.374234                | -0.307003 | 0.791280  |
| 2             | 6             | -1.108979               | -0.662887 | 2.024889  |
| 3             | 1             | -0.611272               | -1.522178 | 2.471117  |
| 4             | 1             | -1.015901               | 0.247345  | 2.610544  |
| 5             | 6             | -0.929261               | -0.410851 | 0.248317  |
| 6             | 6             | -1.363547               | -1.696552 | -0.500808 |
| 7             | 6             | -1.883088               | 0.686895  | -0.186600 |
| 8             | 6             | -2.598468               | -1.300112 | -1.343802 |
| 9             | 1             | -1.600356               | -2.499819 | 0.204002  |
| 10            | 1             | -0.546615               | -2.062096 | -1.127842 |
| 11            | 6             | -3.141413               | -0.038715 | -0.660749 |
| 12            | 1             | -2.289017               | -1.065400 | -2.367039 |
| 13            | 1             | -3.330692               | -2.108709 | -1.400287 |
| 14            | 6             | -1.370094               | 1.875553  | -0.995788 |



|    |   |           |           |           |
|----|---|-----------|-----------|-----------|
| 15 | 6 | -2.001630 | 2.094975  | 0.351233  |
| 16 | 6 | 1.071119  | 0.963389  | 1.206793  |
| 17 | 6 | 1.330529  | -1.473391 | 0.771653  |
| 18 | 6 | 2.304605  | 1.152821  | 0.330052  |
| 19 | 6 | 2.347479  | -1.229137 | -0.374657 |
| 20 | 6 | 2.890227  | 0.182384  | -0.386212 |
| 21 | 1 | -3.746749 | 0.585198  | -1.323481 |
| 22 | 1 | 0.831978  | -2.434074 | 0.639827  |
| 23 | 1 | 1.877467  | -1.499179 | 1.720390  |
| 24 | 1 | 3.166457  | -1.948508 | -0.257213 |
| 25 | 1 | 1.889439  | -1.456341 | -1.347358 |
| 26 | 1 | 2.704214  | 2.163710  | 0.316786  |
| 27 | 1 | 0.430040  | 1.838892  | 1.132227  |
| 28 | 1 | 1.378489  | 0.881632  | 2.259602  |
| 29 | 6 | 4.104641  | 0.424716  | -1.241853 |
| 30 | 1 | 4.406202  | 1.474524  | -1.230913 |
| 31 | 1 | 4.951535  | -0.179334 | -0.894113 |
| 32 | 1 | 3.915138  | 0.133369  | -2.282357 |
| 33 | 1 | -3.776714 | -0.299339 | 0.197761  |
| 34 | 1 | -2.165666 | -0.903399 | 1.895877  |
| 35 | 1 | -0.296559 | 2.008572  | -1.088715 |
| 36 | 1 | -1.930423 | 2.142698  | -1.886710 |
| 37 | 1 | -1.387632 | 2.435542  | 1.176962  |
| 38 | 1 | -3.011492 | 2.494382  | 0.378449  |

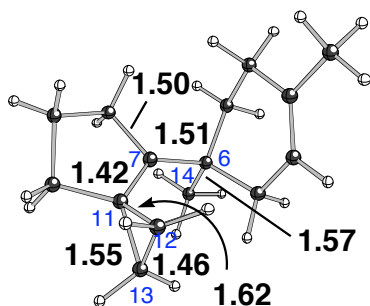

**F'**  
**-24.09 [-30.39]**

**B3LYP/6-31+G(d,p)//B3LYP/6-31+G(d,p)**

HF = -585.1929463 hartrees (-367208.57380325 kcal/mol)

Imaginary Frequencies: none

Zero-point correction = 0.344777 (Hartree/Particle)

Sum of electronic and thermal Free Energies = -367023.7102 kcal/mol (298 Kelvin, 1.0 atm)

**mPW1PW91/6-31+G(d,p)//B3LYP/6-31+G(d,p)**

HF = -585.067702 hartrees (-367129.983005 kcal/mol)

**mPWB1K/6-31+G(d,p)//B3LYP/6-31+G(d,p)**

HF = -584.8676245 hartrees

Coordinates:

| Center<br>Number | Atomic<br>Number | Coordinates (Angstroms) |           |           |
|------------------|------------------|-------------------------|-----------|-----------|
|                  |                  | X                       | Y         | Z         |
| 1                | 6                | 0.273996                | -0.818645 | 0.903166  |
| 2                | 6                | -0.442136               | -1.686034 | 2.004539  |
| 3                | 1                | 0.333488                | -2.053655 | 2.682154  |
| 4                | 1                | -1.158586               | -1.102074 | 2.588200  |
| 5                | 6                | -0.869845               | -0.439115 | -0.003525 |
| 6                | 6                | -1.304248               | -1.358433 | -1.113380 |
| 7                | 6                | -1.813853               | 0.625069  | 0.069115  |
| 8                | 6                | -2.357690               | -0.588436 | -1.930539 |
| 9                | 1                | -1.758876               | -2.236785 | -0.621813 |
| 10               | 1                | -0.468827               | -1.750565 | -1.696240 |
| 11               | 6                | -2.976761               | 0.355645  | -0.891260 |
| 12               | 1                | -1.864200               | -0.017751 | -2.724452 |
| 13               | 1                | -3.086539               | -1.250603 | -2.401544 |
| 14               | 6                | -1.211227               | 2.131507  | 0.118906  |
| 15               | 6                | -2.007496               | 1.630101  | 1.231142  |
| 16               | 6                | 1.054086                | 0.333061  | 1.589068  |
| 17               | 6                | 1.340392                | -1.690106 | 0.185061  |
| 18               | 6                | 2.036827                | 1.016889  | 0.664557  |
| 19               | 6                | 2.117671                | -0.920978 | -0.894400 |
| 20               | 6                | 2.526319                | 0.471493  | -0.460786 |
| 21               | 1                | -3.391701               | 1.270574  | -1.321763 |
| 22               | 1                | 0.903761                | -2.607192 | -0.221949 |
| 23               | 1                | 2.041669                | -2.012752 | 0.962303  |
| 24               | 1                | 3.016063                | -1.493360 | -1.158081 |
| 25               | 1                | 1.546407                | -0.851166 | -1.832692 |
| 26               | 1                | 2.390959                | 1.996968  | 0.980739  |
| 27               | 1                | 0.392846                | 1.067757  | 2.052602  |
| 28               | 1                | 1.596148                | -0.112961 | 2.434343  |
| 29               | 6                | 3.515757                | 1.182166  | -1.345420 |
| 30               | 1                | 3.728426                | 2.193283  | -0.989344 |
| 31               | 1                | 4.462658                | 0.629991  | -1.389849 |
| 32               | 1                | 3.146081                | 1.251626  | -2.376436 |
| 33               | 1                | -3.785388               | -0.141743 | -0.340508 |
| 34               | 1                | -0.954602               | -2.552853 | 1.580133  |
| 35               | 1                | -0.133686               | 2.205138  | 0.197765  |

|    |   |           |          |           |
|----|---|-----------|----------|-----------|
| 36 | 1 | -1.673342 | 2.747421 | -0.646026 |
| 37 | 1 | -1.529780 | 1.406942 | 2.176843  |
| 38 | 1 | -3.043729 | 1.948658 | 1.308163  |

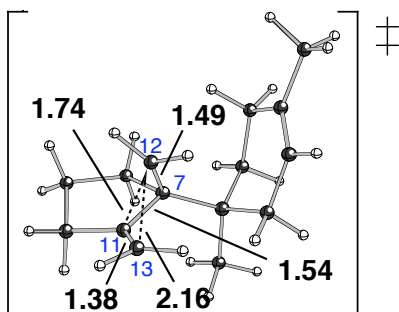

**TS (F'-to-N)**  
**-10.15 [-17.02]**

**B3LYP/6-31+G(d,p)//B3LYP/6-31+G(d,p)**

HF = -585.1704882 hartrees (-367194.4813455 kcal/mol)

Imaginary Frequencies: 1 (-243.4134 1/cm)

Zero-point correction = 0.344536 (Hartree/Particle)

Sum of electronic and thermal Free Energies = -367008.9229 kcal/mol (298 Kelvin, 1.0 atm)

**mPW1PW91/6-31+G(d,p)//B3LYP/6-31+G(d,p)**

HF = -585.0461553 hartrees (-367116.46245075 kcal/mol)

**mPWB1K/6-31+G(d,p)//B3LYP/6-31+G(d,p)**

HF = -584.8480477 hartrees

Coordinates:

| Center Number | Atomic Number | Coordinates (Angstroms) |           |           |
|---------------|---------------|-------------------------|-----------|-----------|
|               |               | X                       | Y         | Z         |
| 1             | 6             | -0.216072               | 0.969463  | 0.630245  |
| 2             | 6             | 0.558382                | 2.053616  | 1.407805  |
| 3             | 1             | 1.155301                | 1.616304  | 2.216078  |
| 4             | 1             | 1.228200                | 2.632937  | 0.765700  |
| 5             | 6             | 0.825096                | 0.085263  | -0.143492 |
| 6             | 6             | 1.489462                | 0.735065  | -1.386200 |
| 7             | 6             | 1.988333                | -0.651381 | 0.540349  |
| 8             | 6             | 2.800656                | -0.027923 | -1.654125 |
| 9             | 1             | 1.701870                | 1.780906  | -1.151799 |
| 10            | 1             | 0.818576                | 0.725560  | -2.247655 |

|    |   |           |           |           |
|----|---|-----------|-----------|-----------|
| 11 | 6 | 3.261263  | -0.506839 | -0.266345 |
| 12 | 6 | -1.125760 | 0.195559  | 1.619504  |
| 13 | 6 | -1.175676 | 1.632490  | -0.396141 |
| 14 | 6 | -2.219955 | -0.623667 | 0.971236  |
| 15 | 6 | -2.046741 | 0.630448  | -1.167589 |
| 16 | 6 | -2.657687 | -0.438713 | -0.285762 |
| 17 | 1 | -0.629652 | 2.279768  | -1.089492 |
| 18 | 1 | -1.831804 | 2.296789  | 0.178615  |
| 19 | 1 | -2.850005 | 1.176359  | -1.678732 |
| 20 | 1 | -1.480512 | 0.149772  | -1.981347 |
| 21 | 1 | -2.705852 | -1.367898 | 1.600890  |
| 22 | 1 | -0.541109 | -0.422019 | 2.312520  |
| 23 | 1 | -1.587201 | 0.943685  | 2.279318  |
| 24 | 6 | -3.775027 | -1.249965 | -0.886293 |
| 25 | 1 | -4.124944 | -2.030545 | -0.205710 |
| 26 | 1 | -4.628873 | -0.607662 | -1.135400 |
| 27 | 1 | -3.460614 | -1.726179 | -1.823989 |
| 28 | 1 | -0.142164 | 2.759931  | 1.861765  |
| 29 | 1 | 2.632764  | -0.884342 | -2.315253 |
| 30 | 1 | 3.546939  | 0.601133  | -2.143227 |
| 31 | 1 | 3.867671  | -1.417252 | -0.280103 |
| 32 | 1 | 3.850828  | 0.270064  | 0.238531  |
| 33 | 6 | 1.806194  | -1.589885 | 1.530716  |
| 34 | 6 | 0.624927  | -1.387376 | -0.264379 |
| 35 | 1 | -0.188050 | -1.841309 | 0.291061  |
| 36 | 1 | 1.009356  | -1.959502 | -1.103162 |
| 37 | 1 | 0.929071  | -1.638586 | 2.160848  |
| 38 | 1 | 2.605829  | -2.294841 | 1.753377  |

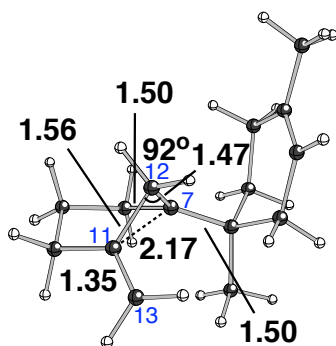

**N**  
**-25.05 [-28.33]**

**B3LYP/6-31+G(d,p)//B3LYP/6-31+G(d,p)**

HF = -585.1939332 hartrees (-367209.193083 kcal/mol)

Imaginary Frequencies: none

Zero-point correction = 0.344239 (Hartree/Particle)  
Sum of electronic and thermal Free Energies = -367025.0349 kcal/mol (298 Kelvin.  
1.0 atm)

**mPW1PW91/6-31+G(d,p)//B3LYP/6-31+G(d,p)**  
HF = -585.0638842 hartrees (-367127.5873355 kcal/mol)

**mPWB1K/6-31+G(d,p)//B3LYP/6-31+G(d,p)**  
HF = -584.8616646 hartrees

Coordinates:

| -----  |        |                         |           |           |
|--------|--------|-------------------------|-----------|-----------|
| Center | Atomic | Coordinates (Angstroms) |           |           |
| Number | Number | X                       | Y         | Z         |
| -----  |        |                         |           |           |
| 1      | 6      | 0.336287                | 0.816414  | 0.784347  |
| 2      | 6      | -0.436747               | 1.788482  | 1.722838  |
| 3      | 1      | -1.143360               | 2.397612  | 1.152387  |
| 4      | 1      | -0.981248               | 1.270708  | 2.515293  |
| 5      | 6      | -0.589908               | -0.214088 | 0.202395  |
| 6      | 6      | -1.328681               | -1.160975 | 1.092292  |
| 7      | 6      | -2.314163               | 0.210006  | -1.043140 |
| 8      | 6      | -2.552869               | -1.807828 | 0.413931  |
| 9      | 1      | -1.576146               | -0.687508 | 2.046621  |
| 10     | 1      | -0.594828               | -1.947018 | 1.341917  |
| 11     | 6      | -3.303242               | -0.760699 | -0.440224 |
| 12     | 6      | 1.122716                | 1.617945  | -0.275979 |
| 13     | 6      | 1.405015                | 0.038305  | 1.648741  |
| 14     | 6      | 2.185910                | 0.807632  | -0.979886 |
| 15     | 6      | 2.287332                | -0.908151 | 0.826787  |
| 16     | 6      | 2.721674                | -0.328957 | -0.503641 |
| 17     | 1      | 0.925391                | -0.484189 | 2.481614  |
| 18     | 1      | 2.025797                | 0.825956  | 2.088768  |
| 19     | 1      | 3.176899                | -1.155351 | 1.420501  |
| 20     | 1      | 1.790535                | -1.876630 | 0.656894  |
| 21     | 1      | 2.550482                | 1.208979  | -1.923642 |
| 22     | 1      | 0.440863                | 2.073069  | -1.004501 |
| 23     | 1      | 1.586171                | 2.472907  | 0.234618  |
| 24     | 6      | 3.792381                | -1.090283 | -1.239818 |
| 25     | 1      | 4.018038                | -0.638843 | -2.209096 |
| 26     | 1      | 4.719708                | -1.121393 | -0.654359 |
| 27     | 1      | 3.493781                | -2.132936 | -1.408280 |
| 28     | 1      | 0.284650                | 2.456117  | 2.200814  |
| 29     | 1      | -2.228657               | -2.640124 | -0.218075 |
| 30     | 1      | -3.208524               | -2.240225 | 1.173065  |
| 31     | 1      | -3.858651               | -1.267129 | -1.239033 |

|    |   |           |           |           |
|----|---|-----------|-----------|-----------|
| 32 | 1 | -4.035429 | -0.214112 | 0.161714  |
| 33 | 6 | -2.578021 | 1.488906  | -1.364924 |
| 34 | 6 | -0.878085 | -0.359665 | -1.227233 |
| 35 | 1 | -0.259443 | 0.232706  | -1.892950 |
| 36 | 1 | -0.935339 | -1.395273 | -1.573664 |
| 37 | 1 | -1.820860 | 2.156289  | -1.763813 |
| 38 | 1 | -3.587424 | 1.884124  | -1.285724 |

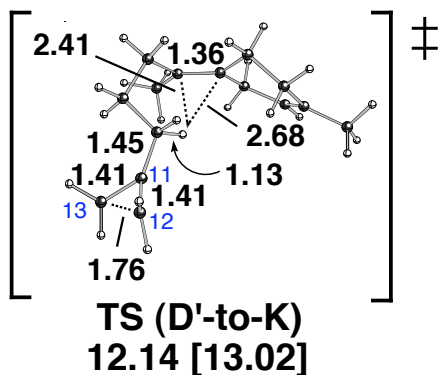

**B3LYP/6-31+G(d,p)//B3LYP/6-31+G(d,p)**

HF = -585.1294552 hartrees (-367168.733138 kcal/mol)

Imaginary Frequencies: 1 (-211.6966 1/cm)

Zero-point correction = 0.339033 (Hartree/Particle)

Sum of electronic and thermal Free Energies = -366990.0286 kcal/mol (298 Kelvin, 1.0 atm)

**mPW1PW91/6-31+G(d,p)//B3LYP/6-31+G(d,p)**

HF = -584.9927835 hartrees (-367082.97164625 kcal/mol)

**mPWB1K/6-31+G(d,p)//B3LYP/6-31+G(d,p)**

HF = -584.7847667 hartrees

Coordinates:

| Center Number | Atomic Number | Coordinates (Angstroms) |           |           |
|---------------|---------------|-------------------------|-----------|-----------|
|               |               | X                       | Y         | Z         |
| 1             | 6             | -2.986216               | 0.102648  | -1.026963 |
| 2             | 6             | -2.949642               | 1.109158  | -0.142110 |
| 3             | 6             | -2.067605               | 1.027195  | 1.084547  |
| 4             | 6             | -1.615171               | -0.412699 | 1.398697  |
| 5             | 6             | -1.126280               | -1.143596 | 0.169583  |
| 6             | 6             | -2.152115               | -1.155669 | -0.945535 |
| 7             | 1             | -1.194331               | 1.687031  | 0.953818  |

|    |   |           |           |           |
|----|---|-----------|-----------|-----------|
| 8  | 1 | -3.648138 | 0.172417  | -1.888265 |
| 9  | 1 | -0.886042 | -0.407298 | 2.211434  |
| 10 | 1 | -2.491462 | -0.960979 | 1.774900  |
| 11 | 1 | -2.606384 | 1.428122  | 1.952602  |
| 12 | 6 | 1.119377  | -1.832930 | 1.132453  |
| 13 | 6 | 2.367017  | -1.011352 | 0.723598  |
| 14 | 1 | 1.444113  | -2.866162 | 1.306448  |
| 15 | 1 | 0.745690  | -1.461008 | 2.088689  |
| 16 | 6 | 1.955927  | 0.447169  | 0.441935  |
| 17 | 1 | 3.124248  | -1.041230 | 1.515245  |
| 18 | 1 | 2.815832  | -1.446226 | -0.176679 |
| 19 | 6 | 2.878155  | 1.264769  | -0.314118 |
| 20 | 6 | 0.059869  | -1.804652 | 0.053178  |
| 21 | 6 | 3.531484  | 2.494709  | -0.118059 |
| 22 | 6 | 4.106817  | 1.062903  | -0.969499 |
| 23 | 1 | 1.603950  | 0.982972  | 1.330979  |
| 24 | 1 | 1.043445  | 0.373884  | -0.213576 |
| 25 | 6 | 0.402079  | -2.603481 | -1.195872 |
| 26 | 1 | -0.390186 | -3.318017 | -1.442646 |
| 27 | 1 | 0.541888  | -1.972372 | -2.082796 |
| 28 | 1 | 1.320530  | -3.180976 | -1.057668 |
| 29 | 1 | -2.818653 | -2.024215 | -0.799467 |
| 30 | 1 | -1.675203 | -1.328105 | -1.916145 |
| 31 | 6 | -3.772409 | 2.361529  | -0.297039 |
| 32 | 1 | -4.475312 | 2.476364  | 0.537927  |
| 33 | 1 | -3.135160 | 3.256003  | -0.294716 |
| 34 | 1 | -4.346583 | 2.357588  | -1.227246 |
| 35 | 1 | 4.365364  | 1.511219  | -1.922672 |
| 36 | 1 | 4.760130  | 0.261485  | -0.626342 |
| 37 | 1 | 3.673020  | 3.237718  | -0.895170 |
| 38 | 1 | 3.721520  | 2.827580  | 0.902575  |

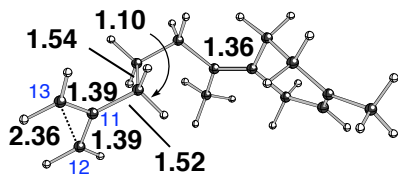

**K**  
**1.03 [-7.45]**

**B3LYP/6-31+G(d,p)//B3LYP/6-31+G(d,p)**

HF = -585.1478943 hartrees (-367180.30367325 kcal/mol)

Imaginary Frequencies: none

Zero-point correction = 0.339758 (Hartree/Particle)

Sum of electronic and thermal Free Energies = -367002.2525 kcal/mol (298 Kelvin.  
1.0 atm)

**mPW1PW91/6-31+G(d,p)//B3LYP/6-31+G(d,p)**

HF = -585.0023819 hartrees (-367088.99464225 kcal/mol)

**mPWB1K/6-31+G(d,p)//B3LYP/6-31+G(d,p)**

HF = -584.7879573 hartrees

Coordinates:

| Center<br>Number | Atomic<br>Number | Coordinates (Angstroms) |           |           |
|------------------|------------------|-------------------------|-----------|-----------|
|                  |                  | X                       | Y         | Z         |
| 1                | 6                | 3.310213                | 0.186737  | -0.907004 |
| 2                | 6                | 3.324521                | -0.996161 | -0.257089 |
| 3                | 6                | 2.279683                | -1.288290 | 0.793103  |
| 4                | 6                | 1.669001                | -0.003755 | 1.383327  |
| 5                | 6                | 1.206175                | 0.959773  | 0.316277  |
| 6                | 6                | 2.265118                | 1.249831  | -0.726769 |
| 7                | 1                | 1.496594                | -1.929331 | 0.357498  |
| 8                | 1                | 4.077204                | 0.398546  | -1.649289 |
| 9                | 1                | 0.880284                | -0.258877 | 2.092896  |
| 10               | 1                | 2.456327                | 0.501046  | 1.964717  |
| 11               | 1                | 2.724764                | -1.878804 | 1.603838  |
| 12               | 6                | -1.097883               | 1.373346  | 1.310500  |
| 13               | 6                | -2.426176               | 0.831163  | 0.725958  |
| 14               | 1                | -1.326748               | 2.339170  | 1.781719  |
| 15               | 1                | -0.776610               | 0.708834  | 2.115604  |
| 16               | 6                | -2.287042               | -0.580488 | 0.121172  |
| 17               | 1                | -3.177580               | 0.813955  | 1.524184  |
| 18               | 1                | -2.802996               | 1.523319  | -0.037995 |
| 19               | 6                | -3.606567               | -1.117245 | -0.394473 |
| 20               | 6                | -0.002925               | 1.590087  | 0.288534  |
| 21               | 6                | -4.287307               | -2.161449 | 0.222400  |
| 22               | 6                | -4.205939               | -0.564500 | -1.520398 |
| 23               | 1                | -1.885461               | -1.269739 | 0.871681  |
| 24               | 1                | -1.561864               | -0.557936 | -0.701020 |
| 25               | 6                | -0.338943               | 2.619979  | -0.772361 |
| 26               | 1                | 0.532623                | 3.194278  | -1.094457 |
| 27               | 1                | -0.765683               | 2.159543  | -1.675587 |
| 28               | 1                | -1.078219               | 3.335721  | -0.399376 |
| 29               | 1                | 2.769900                | 2.199492  | -0.467274 |
| 30               | 1                | 1.806772                | 1.451529  | -1.704489 |
| 31               | 6                | 4.340240                | -2.065230 | -0.540489 |
| 32               | 1                | 4.939388                | -2.281168 | 0.353825  |



|    |   |           |           |           |
|----|---|-----------|-----------|-----------|
| 33 | 1 | 3.848906  | -3.007371 | -0.818271 |
| 34 | 1 | 5.018829  | -1.782249 | -1.349019 |
| 35 | 1 | -5.154668 | -0.937290 | -1.897094 |
| 36 | 1 | -3.743405 | 0.249707  | -2.072095 |
| 37 | 1 | -5.240369 | -2.516451 | -0.159508 |
| 38 | 1 | -3.890989 | -2.658707 | 1.103393  |

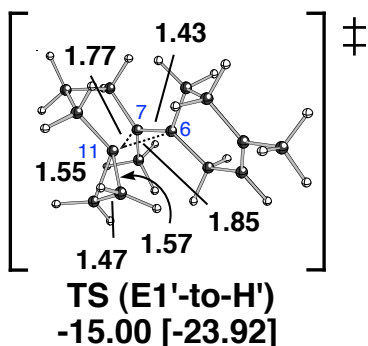

**B3LYP/6-31+G(d,p)//B3LYP/6-31+G(d,p)**

HF = -585.1785545 hartrees (-367199.54294875 kcal/mol)

Imaginary Frequencies: 1 (-166.7088 1/cm)

Zero-point correction = 0.344870 (Hartree/Particle)

Sum of electronic and thermal Free Energies = -367013.6418 kcal/mol (298 Kelvin, 1.0 atm)

**mPW1PW91/6-31+G(d,p)//B3LYP/6-31+G(d,p)**

HF = -585.05749 hartrees (-367123.574975 kcal/mol)

**mPWB1K/6-31+G(d,p)//B3LYP/6-31+G(d,p)**

HF = -584.8603345 hartrees

Coordinates:

| Center Number | Atomic Number | Coordinates (Angstroms) |           |           |
|---------------|---------------|-------------------------|-----------|-----------|
|               |               | X                       | Y         | Z         |
| 1             | 6             | -2.355241               | 1.126518  | -0.203546 |
| 2             | 6             | -2.837525               | -0.120349 | -0.103877 |
| 3             | 6             | -1.943830               | -1.312713 | -0.361481 |
| 4             | 6             | -0.680299               | -0.955863 | -1.156197 |
| 5             | 6             | 0.018303                | 0.293153  | -0.663149 |
| 6             | 6             | -0.925509               | 1.478159  | -0.541423 |
| 7             | 1             | -1.674512               | -1.788597 | 0.592586  |
| 8             | 1             | -3.013126               | 1.976359  | -0.036511 |
| 9             | 1             | -0.014360               | -1.813858 | -1.230200 |

|    |   |           |           |           |
|----|---|-----------|-----------|-----------|
| 10 | 1 | -0.971357 | -0.704818 | -2.187890 |
| 11 | 1 | -2.499034 | -2.075255 | -0.919977 |
| 12 | 6 | 2.356084  | -0.594045 | -1.302741 |
| 13 | 6 | 2.853379  | -1.426299 | -0.102650 |
| 14 | 1 | 3.186508  | -0.128752 | -1.838809 |
| 15 | 1 | 1.827410  | -1.225353 | -2.021410 |
| 16 | 6 | 1.673905  | -1.473386 | 0.874170  |
| 17 | 1 | 3.192123  | -2.419343 | -0.408554 |
| 18 | 1 | 3.704989  | -0.922891 | 0.368353  |
| 19 | 6 | 1.029858  | -0.087524 | 0.843464  |
| 20 | 6 | 1.425431  | 0.509661  | -0.771761 |
| 21 | 6 | 0.096529  | 0.283594  | 2.044997  |
| 22 | 6 | 1.415917  | 0.919553  | 1.951477  |
| 23 | 1 | 1.991902  | -1.698634 | 1.897041  |
| 24 | 1 | 0.951789  | -2.248369 | 0.598590  |
| 25 | 6 | 2.018129  | 1.899073  | -0.868594 |
| 26 | 1 | 1.420226  | 2.688081  | -0.415378 |
| 27 | 1 | 3.022065  | 1.920666  | -0.436052 |
| 28 | 1 | 2.117242  | 2.135184  | -1.935038 |
| 29 | 1 | -0.883715 | 1.987708  | -1.518595 |
| 30 | 1 | -0.545809 | 2.223643  | 0.165461  |
| 31 | 6 | -4.267249 | -0.415235 | 0.260724  |
| 32 | 1 | -4.775321 | -0.944679 | -0.554740 |
| 33 | 1 | -4.321251 | -1.068391 | 1.140913  |
| 34 | 1 | -4.828050 | 0.496936  | 0.478158  |
| 35 | 1 | 1.458570  | 1.971419  | 1.692907  |
| 36 | 1 | 2.228685  | 0.580992  | 2.587939  |
| 37 | 1 | -0.796042 | 0.868472  | 1.866072  |
| 38 | 1 | -0.046220 | -0.556307 | 2.718643  |

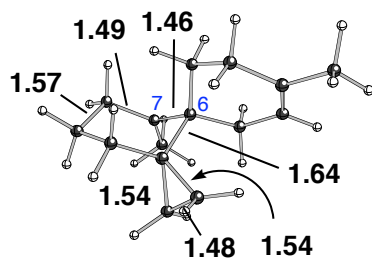

H'  
-16.92 [-24.83]

**B3LYP/6-31+G(d,p)//B3LYP/6-31+G(d,p)**

HF = -585.1819146 hartrees (-367201.6514115 kcal/mol)

Imaginary Frequencies: none

Zero-point correction = 0.345169 (Hartree/Particle)

Sum of electronic and thermal Free Energies = -367013.6418 kcal/mol (298 Kelvin.  
1.0 atm)

**mPW1PW91/6-31+G(d,p)//B3LYP/6-31+G(d,p)**

HF = -585.0592419 hartrees (-367124.67429225 kcal/mol)

**mPWB1K/6-31+G(d,p)//B3LYP/6-31+G(d,p)**

HF = -584.8613077 hartrees

Coordinates:

| -----  |        |                         |           |           |
|--------|--------|-------------------------|-----------|-----------|
| Center | Atomic | Coordinates (Angstroms) |           |           |
| Number | Number | X                       | Y         | Z         |
| -----  |        |                         |           |           |
| 1      | 6      | -2.256534               | 1.131226  | 0.268411  |
| 2      | 6      | -2.777312               | -0.006749 | -0.211165 |
| 3      | 6      | -1.903090               | -0.996279 | -0.945961 |
| 4      | 6      | -0.601283               | -0.371469 | -1.459313 |
| 5      | 6      | 0.136139                | 0.438331  | -0.368017 |
| 6      | 6      | -0.805694               | 1.541834  | 0.162863  |
| 7      | 1      | -1.691458               | -1.857282 | -0.295141 |
| 8      | 1      | -2.900007               | 1.845744  | 0.777747  |
| 9      | 1      | 0.027515                | -1.142084 | -1.904723 |
| 10     | 1      | -0.840823               | 0.339832  | -2.259830 |
| 11     | 1      | -2.450973               | -1.406908 | -1.802783 |
| 12     | 6      | 2.426955                | -0.048854 | -1.393280 |
| 13     | 6      | 2.781929                | -1.275430 | -0.485568 |
| 14     | 1      | 3.340129                | 0.481529  | -1.673420 |
| 15     | 1      | 1.940060                | -0.407668 | -2.304751 |
| 16     | 6      | 1.524286                | -1.740004 | 0.254878  |
| 17     | 1      | 3.220222                | -2.062330 | -1.104945 |
| 18     | 1      | 3.545817                | -0.961953 | 0.233935  |
| 19     | 6      | 0.770566                | -0.530504 | 0.792611  |
| 20     | 6      | 1.507876                | 0.856541  | -0.642381 |
| 21     | 6      | -0.051505               | -0.675142 | 2.085296  |
| 22     | 6      | 1.255075                | 0.025926  | 2.144726  |
| 23     | 1      | 1.806199                | -2.382008 | 1.095773  |
| 24     | 1      | 0.883551                | -2.347236 | -0.391151 |
| 25     | 6      | 2.079553                | 2.139800  | -0.170482 |
| 26     | 1      | 1.477482                | 2.678664  | 0.557244  |
| 27     | 1      | 3.108288                | 2.018544  | 0.183917  |
| 28     | 1      | 2.146618                | 2.771015  | -1.073935 |
| 29     | 1      | -0.723869               | 2.406983  | -0.511641 |
| 30     | 1      | -0.471071               | 1.911644  | 1.139053  |
| 31     | 6      | -4.229306               | -0.369838 | -0.053701 |
| 32     | 1      | -4.715562               | -0.466189 | -1.032360 |

|    |   |           |           |          |
|----|---|-----------|-----------|----------|
| 33 | 1 | -4.339134 | -1.339503 | 0.448448 |
| 34 | 1 | -4.775140 | 0.377914  | 0.526947 |
| 35 | 1 | 1.241660  | 1.098412  | 2.309135 |
| 36 | 1 | 2.111638  | -0.477827 | 2.582790 |
| 37 | 1 | -0.963676 | -0.099147 | 2.176895 |
| 38 | 1 | -0.123386 | -1.696482 | 2.449284 |

**Figure 1b.**

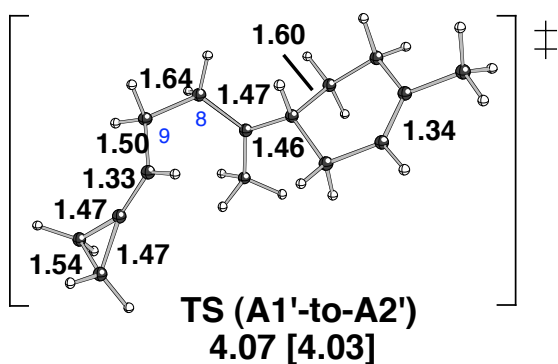

**B3LYP/6-31+G(d,p)//B3LYP/6-31+G(d,p)**

HF = -585.143419 hartrees (-367177.4954225 kcal/mol)

Imaginary Frequencies: 1 (-90.1979 1/cm)

Zero-point correction = 0.340133 (Hartree/Particle)

Sum of electronic and thermal Free Energies = -366997.8819 kcal/mol (298 Kelvin, 1.0 atm)

**mPW1PW91/6-31+G(d,p)//B3LYP/6-31+G(d,p)**

HF = -585.008212 hartrees (-367092.65303 kcal/mol)

**mPWB1K/6-31+G(d,p)//B3LYP/6-31+G(d,p)**

HF = -584.8010827 hartrees

Coordinates:

| Center Number | Atomic Number | Coordinates (Angstroms) |           |           |
|---------------|---------------|-------------------------|-----------|-----------|
|               |               | X                       | Y         | Z         |
| 1             | 6             | 2.780809                | 1.500809  | 0.045319  |
| 2             | 6             | 3.758294                | 0.610744  | -0.182805 |
| 3             | 6             | 3.506260                | -0.878708 | -0.100541 |
| 4             | 6             | 2.170520                | -1.260413 | 0.550549  |
| 5             | 6             | 1.034702                | -0.304537 | -0.040973 |
| 6             | 6             | 1.352748                | 1.144687  | 0.378804  |

|    |   |           |           |           |
|----|---|-----------|-----------|-----------|
| 7  | 1 | 3.581023  | -1.321165 | -1.103958 |
| 8  | 1 | 3.000851  | 2.563941  | -0.019674 |
| 9  | 1 | 1.944327  | -2.313930 | 0.362373  |
| 10 | 1 | 2.207872  | -1.108244 | 1.633734  |
| 11 | 1 | 4.301492  | -1.353138 | 0.490999  |
| 12 | 6 | -0.925949 | -1.852989 | -0.445129 |
| 13 | 6 | -2.278509 | -1.221460 | -1.115817 |
| 14 | 1 | -1.268462 | -2.707586 | 0.146140  |
| 15 | 1 | -0.279389 | -2.203409 | -1.251036 |
| 16 | 6 | -2.596167 | 0.226197  | -0.892904 |
| 17 | 1 | -2.138370 | -1.405704 | -2.185254 |
| 18 | 1 | -3.112121 | -1.835648 | -0.772480 |
| 19 | 6 | -3.722929 | 0.643998  | -0.318834 |
| 20 | 6 | -0.216868 | -0.905404 | 0.418764  |
| 21 | 6 | -4.607524 | 1.762590  | 0.023480  |
| 22 | 6 | -5.018411 | 0.302226  | 0.289950  |
| 23 | 1 | -1.901938 | 0.968077  | -1.291442 |
| 24 | 1 | 1.104416  | -0.402462 | -1.131026 |
| 25 | 6 | -0.814298 | -0.556268 | 1.711663  |
| 26 | 1 | -0.115335 | -0.137746 | 2.436049  |
| 27 | 1 | -1.538439 | 0.246733  | 1.447287  |
| 28 | 1 | -1.408484 | -1.364787 | 2.143088  |
| 29 | 1 | 1.165533  | 1.294208  | 1.449931  |
| 30 | 1 | 0.670667  | 1.824122  | -0.147216 |
| 31 | 6 | 5.160470  | 1.020278  | -0.548081 |
| 32 | 1 | 5.879514  | 0.672198  | 0.203754  |
| 33 | 1 | 5.463009  | 0.575565  | -1.504564 |
| 34 | 1 | 5.254688  | 2.105519  | -0.633343 |
| 35 | 1 | -5.048023 | -0.029971 | 1.325982  |
| 36 | 1 | -5.790472 | -0.135632 | -0.339493 |
| 37 | 1 | -4.367792 | 2.383271  | 0.884573  |
| 38 | 1 | -5.103462 | 2.295294  | -0.785089 |

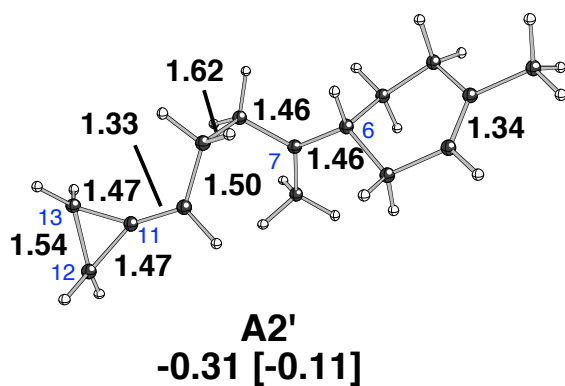

**B3LYP/6-31+G(d,p)//B3LYP/6-31+G(d,p)**

HF = -585.1508119 hartrees (-367182.13446725 kcal/mol)

Imaginary Frequencies: none

Zero-point correction = 0.340544 (Hartree/Particle)

Sum of electronic and thermal Free Energies = -367003.1122 kcal/mol (298 Kelvin.  
1.0 atm)

**mPW1PW91/6-31+G(d,p)//B3LYP/6-31+G(d,p)**

HF = -585.0152269 hartrees (-367097.05487975 kcal/mol)

**mPWB1K/6-31+G(d,p)//B3LYP/6-31+G(d,p)**

HF = -584.8077035 hartrees

Coordinates:

| -----  |        |                         |           |           |
|--------|--------|-------------------------|-----------|-----------|
| Center | Atomic | Coordinates (Angstroms) |           |           |
| Number | Number | X                       | Y         | Z         |
| -----  |        |                         |           |           |
| 1      | 6      | -3.080102               | -1.368108 | 0.265366  |
| 2      | 6      | -3.952953               | -0.449148 | -0.174728 |
| 3      | 6      | -3.552898               | 0.999041  | -0.351066 |
| 4      | 6      | -2.207006               | 1.365128  | 0.286788  |
| 5      | 6      | -1.157167               | 0.222995  | -0.055856 |
| 6      | 6      | -1.637773               | -1.091089 | 0.610282  |
| 7      | 1      | -3.549985               | 1.250318  | -1.421258 |
| 8      | 1      | -3.401787               | -2.401268 | 0.376480  |
| 9      | 1      | -1.865576               | 2.337614  | -0.080929 |
| 10     | 1      | -2.299336               | 1.429036  | 1.375637  |
| 11     | 1      | -4.316184               | 1.647563  | 0.100566  |
| 12     | 6      | 1.101077                | 1.189335  | -0.653643 |
| 13     | 6      | 1.943424                | -0.082170 | -1.205894 |
| 14     | 1      | 1.824453                | 1.907724  | -0.263439 |
| 15     | 1      | 0.583678                | 1.594316  | -1.528645 |
| 16     | 6      | 2.828885                | -0.755064 | -0.205662 |
| 17     | 1      | 1.232759                | -0.783888 | -1.652223 |
| 18     | 1      | 2.539595                | 0.353988  | -2.011837 |
| 19     | 6      | 4.133990                | -0.502591 | -0.102843 |
| 20     | 6      | 0.151393                | 0.736314  | 0.356720  |
| 21     | 6      | 5.422837                | -0.829875 | 0.512170  |
| 22     | 6      | 5.307418                | 0.237398  | -0.591970 |
| 23     | 1      | 2.392620                | -1.526479 | 0.429025  |
| 24     | 1      | -1.171715               | 0.101825  | -1.145409 |
| 25     | 6      | 0.565294                | 0.804694  | 1.768303  |
| 26     | 1      | -0.151691               | 0.402571  | 2.481351  |
| 27     | 1      | 1.530687                | 0.274621  | 1.856599  |
| 28     | 1      | 0.811230                | 1.844791  | 2.025537  |

|    |   |           |           |           |
|----|---|-----------|-----------|-----------|
| 29 | 1 | -1.506590 | -1.045952 | 1.698987  |
| 30 | 1 | -1.009553 | -1.919130 | 0.259675  |
| 31 | 6 | -5.373610 | -0.788827 | -0.539560 |
| 32 | 1 | -6.082652 | -0.242561 | 0.094665  |
| 33 | 1 | -5.592031 | -0.502881 | -1.576277 |
| 34 | 1 | -5.573484 | -1.857764 | -0.432994 |
| 35 | 1 | 5.435417  | 1.278746  | -0.302920 |
| 36 | 1 | 5.699872  | -0.002944 | -1.578224 |
| 37 | 1 | 5.623318  | -0.489202 | 1.526042  |
| 38 | 1 | 5.890109  | -1.779240 | 0.259155  |

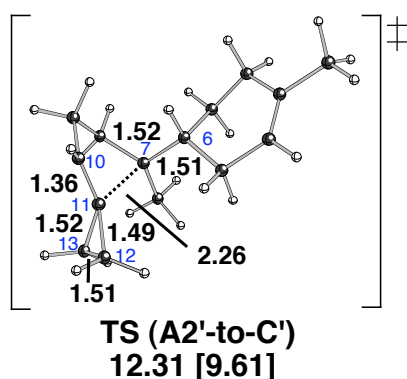

**B3LYP/6-31+G(d,p)//B3LYP/6-31+G(d,p)**

HF = -585.1319081 hartrees (-367170.27233275 kcal/mol)

Imaginary Frequencies: 1 (-268.5814 1/cm)

Zero-point correction = 0.341743 (Hartree/Particle)

Sum of electronic and thermal Free Energies = -584.7964178 kcal/mol (298 Kelvin, 1.0 atm)

**B3LYP/6-31+G(d,p)//B3LYP/6-31+G(d,p):CPCM (solvent=benzene, radii=uaks)**

HF = -585.1670489 hartrees (-367198.174855239 kcal/mol)

**mPW1PW91/6-31+G(d,p)//B3LYP/6-31+G(d,p)**

HF = -585.0009371 hartrees (-367088.08803025 kcal/mol)

**mPWB1K/6-31+G(d,p)//B3LYP/6-31+G(d,p)**

HF = -584.7964178 hartrees

Coordinates:

| Center Number | Atomic Number | Coordinates (Angstroms) |           |          |
|---------------|---------------|-------------------------|-----------|----------|
|               |               | X                       | Y         | Z        |
| 1             | 6             | 0.448395                | -0.295888 | 0.087003 |
| 2             | 6             | -1.191827               | -0.579846 | 2.035882 |

|    |   |           |           |           |
|----|---|-----------|-----------|-----------|
| 3  | 1 | -2.195562 | -0.900205 | 2.314146  |
| 4  | 1 | -0.487747 | -1.258855 | 2.540635  |
| 5  | 1 | -0.986142 | 0.417118  | 2.433448  |
| 6  | 6 | -0.921786 | -0.704204 | 0.571493  |
| 7  | 6 | -1.630751 | -1.837187 | -0.152577 |
| 8  | 6 | -2.360339 | 0.703908  | -0.446418 |
| 9  | 6 | -1.842120 | -1.431925 | -1.615008 |
| 10 | 1 | -2.584221 | -2.041951 | 0.340653  |
| 11 | 1 | -1.024578 | -2.748729 | -0.065854 |
| 12 | 6 | -2.131785 | 0.033765  | -1.608095 |
| 13 | 1 | -0.946991 | -1.617592 | -2.220916 |
| 14 | 1 | -2.646446 | -1.992200 | -2.112797 |
| 15 | 6 | 0.879110  | 1.152862  | 0.393738  |
| 16 | 6 | 1.523675  | -1.263639 | 0.687232  |
| 17 | 6 | 2.327431  | 1.387579  | 0.033805  |
| 18 | 6 | 2.861616  | -1.043121 | -0.030604 |
| 19 | 6 | 3.230518  | 0.417852  | -0.177270 |
| 20 | 1 | 0.490073  | -0.427925 | -0.999127 |
| 21 | 1 | 1.216914  | -2.311167 | 0.593599  |
| 22 | 1 | 1.642720  | -1.048271 | 1.754740  |
| 23 | 1 | 3.647281  | -1.563516 | 0.532928  |
| 24 | 1 | 2.848828  | -1.520656 | -1.021814 |
| 25 | 1 | 2.629432  | 2.428294  | -0.063849 |
| 26 | 1 | 0.248349  | 1.845983  | -0.175340 |
| 27 | 1 | 0.717528  | 1.389941  | 1.454872  |
| 28 | 6 | 4.654106  | 0.706084  | -0.574312 |
| 29 | 1 | 4.832065  | 1.777340  | -0.697108 |
| 30 | 1 | 5.356005  | 0.326105  | 0.178488  |
| 31 | 1 | 4.906459  | 0.208004  | -1.519240 |
| 32 | 6 | -2.810791 | 2.091913  | -0.152415 |
| 33 | 6 | -3.447825 | 0.940379  | 0.584997  |
| 34 | 1 | -2.004892 | 0.593119  | -2.536638 |
| 35 | 1 | -3.225815 | 0.833026  | 1.640055  |
| 36 | 1 | -4.439024 | 0.603105  | 0.293834  |
| 37 | 1 | -2.145613 | 2.722872  | 0.432691  |
| 38 | 1 | -3.374387 | 2.614969  | -0.922119 |

---



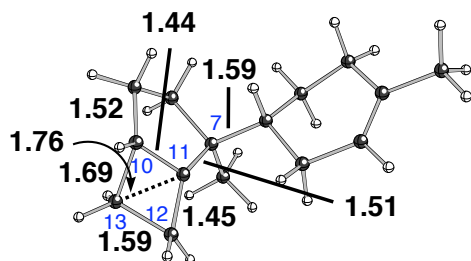

**C'**  
**-16.04 [-24.76]**

**B3LYP/6-31+G(d,p)//B3LYP/6-31+G(d,p)**

HF = -585.1805479 hartrees (-367200.79380725 kcal/mol)

Imaginary Frequencies: none

Zero-point correction = 0.345210 (Hartree/Particle)

Sum of electronic and thermal Free Energies = -367015.4942 kcal/mol (298 Kelvin, 1.0 atm)

**mPW1PW91/6-31+G(d,p)//B3LYP/6-31+G(d,p)**

HF = -585.0591656 hartrees (-367124.626414 kcal/mol)

**mPWB1K/6-31+G(d,p)//B3LYP/6-31+G(d,p)**

HF = -584.860944 hartrees

Coordinates:

| Center Number | Atomic Number | Coordinates (Angstroms) |           |           |
|---------------|---------------|-------------------------|-----------|-----------|
|               |               | X                       | Y         | Z         |
| 1             | 6             | 0.455111                | -0.217291 | 0.016766  |
| 2             | 6             | -1.147307               | -0.374541 | 2.063651  |
| 3             | 1             | -2.192351               | -0.383816 | 2.392063  |
| 4             | 1             | -0.672059               | -1.258073 | 2.494522  |
| 5             | 1             | -0.660210               | 0.505117  | 2.492662  |
| 6             | 6             | -1.039625               | -0.418107 | 0.533349  |
| 7             | 6             | -1.661607               | -1.712947 | -0.084485 |
| 8             | 6             | -1.787236               | 0.675227  | -0.186892 |
| 9             | 6             | -2.247905               | -1.313101 | -1.460470 |
| 10            | 1             | -2.455942               | -2.081655 | 0.573374  |
| 11            | 1             | -0.925806               | -2.514689 | -0.166792 |
| 12            | 6             | -2.511800               | 0.172558  | -1.321586 |
| 13            | 1             | -1.530719               | -1.460401 | -2.275511 |
| 14            | 1             | -3.147620               | -1.874469 | -1.727351 |
| 15            | 6             | 0.983680                | 1.227412  | 0.144552  |
| 16            | 6             | 1.438054                | -1.177711 | 0.713850  |
| 17            | 6             | 2.459672                | 1.323626  | -0.165070 |

|    |   |           |           |           |
|----|---|-----------|-----------|-----------|
| 18 | 6 | 2.804251  | -1.134780 | 0.013996  |
| 19 | 6 | 3.291963  | 0.274590  | -0.247327 |
| 20 | 1 | 0.450384  | -0.470574 | -1.052669 |
| 21 | 1 | 1.060181  | -2.205706 | 0.723565  |
| 22 | 1 | 1.564031  | -0.870667 | 1.758542  |
| 23 | 1 | 3.538843  | -1.665824 | 0.632812  |
| 24 | 1 | 2.767406  | -1.689699 | -0.935818 |
| 25 | 1 | 2.845234  | 2.326627  | -0.336860 |
| 26 | 1 | 0.442507  | 1.895481  | -0.542113 |
| 27 | 1 | 0.791045  | 1.619635  | 1.154996  |
| 28 | 6 | 4.748599  | 0.422846  | -0.598990 |
| 29 | 1 | 5.011713  | 1.461804  | -0.813561 |
| 30 | 1 | 5.387416  | 0.069089  | 0.219986  |
| 31 | 1 | 5.002672  | -0.181818 | -1.479102 |
| 32 | 6 | -2.474099 | 1.832233  | 0.354359  |
| 33 | 6 | -3.546245 | 0.749361  | -0.112405 |
| 34 | 1 | -2.721080 | 0.785378  | -2.195164 |
| 35 | 1 | -3.887363 | 0.030643  | 0.624825  |
| 36 | 1 | -4.342782 | 1.228184  | -0.676019 |
| 37 | 1 | -2.355465 | 2.034310  | 1.414899  |
| 38 | 1 | -2.563075 | 2.724866  | -0.261075 |

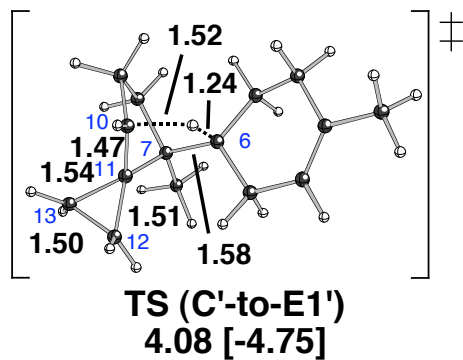

**B3LYP/6-31+G(d,p)//B3LYP/6-31+G(d,p)**

HF = -585.1435432 hartrees (-367177.573358 kcal/mol)

Imaginary Frequencies: 1 (-434.4638 1/cm)

Zero-point correction = 0.340262 (Hartree/Particle)

Sum of electronic and thermal Free Energies = -366994.8548 kcal/mol (298 Kelvin, 1.0 atm)

**B3LYP/6-31+G(d,p)//B3LYP/6-31+G(d,p):CPCM (solvent=benzene, radii=uaks)**

HF = -585.1761043 hartrees (-367203.857209293 kcal/mol)

**mPW1PW91/6-31+G(d,p)//B3LYP/6-31+G(d,p)**

HF = -585.0223408 hartrees (-367101.518852 kcal/mol)

**mPWB1K/6-31+G(d,p)//B3LYP/6-31+G(d,p)**

HF = -584.8212501 hartrees

Coordinates:

| -----  |        |                         |           |           |
|--------|--------|-------------------------|-----------|-----------|
| Center | Atomic | Coordinates (Angstroms) |           |           |
| Number | Number | X                       | Y         | Z         |
| -----  |        |                         |           |           |
| 1      | 6      | -0.234144               | 0.145912  | 0.360244  |
| 2      | 6      | 1.670152                | -0.068912 | 2.150330  |
| 3      | 1      | 2.741858                | 0.082165  | 2.313992  |
| 4      | 1      | 1.143124                | 0.560078  | 2.874778  |
| 5      | 1      | 1.436204                | -1.112049 | 2.381339  |
| 6      | 6      | 1.293656                | 0.307693  | 0.724638  |
| 7      | 6      | 1.738683                | 1.737079  | 0.299890  |
| 8      | 6      | 1.886992                | -0.504005 | -0.451964 |
| 9      | 6      | 1.473638                | 1.739875  | -1.231439 |
| 10     | 1      | 2.805850                | 1.852189  | 0.508463  |
| 11     | 1      | 1.219171                | 2.537882  | 0.827560  |
| 12     | 6      | 1.253012                | 0.281277  | -1.518919 |
| 13     | 1      | 0.644112                | 2.371432  | -1.563232 |
| 14     | 1      | 2.348565                | 2.056452  | -1.817787 |
| 15     | 6      | -0.849693               | -1.233267 | 0.581950  |
| 16     | 6      | -1.220219               | 1.247168  | 0.712399  |
| 17     | 6      | -2.293577               | -1.335274 | 0.154453  |
| 18     | 6      | -2.547424               | 1.127638  | -0.058687 |
| 19     | 6      | -3.073878               | -0.288179 | -0.150264 |
| 20     | 1      | -0.117003               | 0.189103  | -0.869218 |
| 21     | 1      | -0.798490               | 2.244923  | 0.577356  |
| 22     | 1      | -1.416483               | 1.136222  | 1.790471  |
| 23     | 1      | -3.293297               | 1.767973  | 0.427031  |
| 24     | 1      | -2.433455               | 1.539757  | -1.073320 |
| 25     | 1      | -2.697118               | -2.343458 | 0.095692  |
| 26     | 1      | -0.257296               | -2.013746 | 0.097235  |
| 27     | 1      | -0.759599               | -1.435663 | 1.662468  |
| 28     | 6      | -4.499365               | -0.441254 | -0.608643 |
| 29     | 1      | -4.787583               | -1.491882 | -0.692857 |
| 30     | 1      | -5.189139               | 0.048820  | 0.089581  |
| 31     | 1      | -4.651596               | 0.033832  | -1.586260 |
| 32     | 6      | 2.240906                | -1.968083 | -0.523359 |
| 33     | 6      | 3.343015                | -0.959295 | -0.630110 |
| 34     | 1      | 1.027708                | -0.093310 | -2.519833 |
| 35     | 1      | 3.991358                | -0.798749 | 0.226898  |
| 36     | 1      | 3.820123                | -0.804995 | -1.593117 |
| 37     | 1      | 2.168812                | -2.538072 | 0.397953  |

38 1 1.963645 -2.519146 -1.418304

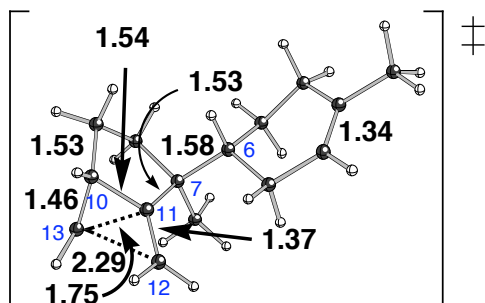

**TS (C'-to-J)**  
**-9.52 [-15.40]**

**B3LYP/6-31+G(d,p)//B3LYP/6-31+G(d,p)**

HF = -585.1692899 hartrees (-367193.72941225 kcal/mol)

Imaginary Frequencies: 1 (-147.8454 1/cm)

Zero-point correction = 0.344350 (Hartree/Particle)

Sum of electronic and thermal Free Energies = -367008.6399 kcal/mol (298 Kelvin, 1.0 atm)

**mPW1PW91/6-31+G(d,p)//B3LYP/6-31+G(d,p)**

HF = -585.0433931 hartrees (-367114.72917025 kcal/mol)

**mPWB1K/6-31+G(d,p)//B3LYP/6-31+G(d,p)**

HF = -584.8441597 hartrees

Coordinates:

| Center Number | Atomic Number | Coordinates (Angstroms) |           |           |
|---------------|---------------|-------------------------|-----------|-----------|
|               |               | X                       | Y         | Z         |
| 1             | 6             | 0.423200                | -0.181361 | 0.049706  |
| 2             | 6             | -1.163771               | -0.269212 | 2.099314  |
| 3             | 1             | -2.207830               | -0.266610 | 2.431262  |
| 4             | 1             | -0.684004               | -1.141110 | 2.549233  |
| 5             | 1             | -0.675387               | 0.618553  | 2.511145  |
| 6             | 6             | -1.064760               | -0.341420 | 0.565681  |
| 7             | 6             | -1.684698               | -1.659371 | 0.003832  |
| 8             | 6             | -1.896029               | 0.735356  | -0.140680 |
| 9             | 6             | -2.240664               | -1.329387 | -1.396294 |
| 10            | 1             | -2.487588               | -2.005411 | 0.664885  |
| 11            | 1             | -0.954793               | -2.469179 | -0.034101 |
| 12            | 6             | -2.704779               | 0.125214  | -1.305202 |

|    |   |           |           |           |
|----|---|-----------|-----------|-----------|
| 13 | 1 | -1.463403 | -1.392804 | -2.162781 |
| 14 | 1 | -3.055030 | -1.992719 | -1.699367 |
| 15 | 6 | 1.014499  | 1.235873  | 0.190757  |
| 16 | 6 | 1.391194  | -1.175770 | 0.723817  |
| 17 | 6 | 2.483164  | 1.282165  | -0.169256 |
| 18 | 6 | 2.744481  | -1.185767 | -0.001415 |
| 19 | 6 | 3.275181  | 0.204508  | -0.276768 |
| 20 | 1 | 0.410073  | -0.415903 | -1.024467 |
| 21 | 1 | 0.981365  | -2.190844 | 0.746106  |
| 22 | 1 | 1.549636  | -0.873893 | 1.766202  |
| 23 | 1 | 3.474393  | -1.741808 | 0.600680  |
| 24 | 1 | 2.666313  | -1.739177 | -0.949755 |
| 25 | 1 | 2.898113  | 2.271551  | -0.351543 |
| 26 | 1 | 0.487130  | 1.945493  | -0.464809 |
| 27 | 1 | 0.880354  | 1.610982  | 1.217655  |
| 28 | 6 | 4.725620  | 0.302961  | -0.669268 |
| 29 | 1 | 5.019285  | 1.332631  | -0.889107 |
| 30 | 1 | 5.374250  | -0.076032 | 0.130509  |
| 31 | 1 | 4.932838  | -0.308027 | -1.557210 |
| 32 | 6 | -2.020539 | 2.058915  | 0.196231  |
| 33 | 6 | -3.629377 | 0.488819  | -0.232933 |
| 34 | 1 | -2.784215 | 0.715498  | -2.215742 |
| 35 | 1 | -3.873620 | -0.196477 | 0.572256  |
| 36 | 1 | -4.284675 | 1.346173  | -0.337765 |
| 37 | 1 | -1.559264 | 2.453781  | 1.098219  |
| 38 | 1 | -2.560274 | 2.766200  | -0.426642 |

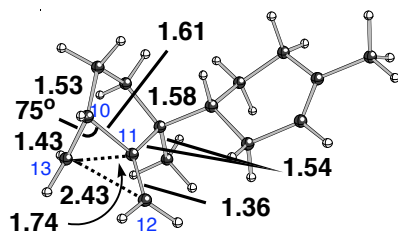

**J**  
**-9.61 [-14.95]**

**B3LYP/6-31+G(d,p)//B3LYP/6-31+G(d,p)**

HF = -585.1695311 hartrees (-367193.88076525 kcal/mol)

Imaginary Frequencies: none

Zero-point correction = 0.344443 (Hartree/Particle)

Sum of electronic and thermal Free Energies = -367009.1325 kcal/mol (298 Kelvin, 1.0 atm)

**mPW1PW91/6-31+G(d,p)//B3LYP/6-31+G(d,p)**

HF = -585.0427731 hartrees (-367114.34012025 kcal/mol)

**mPWB1K/6-31+G(d,p)//B3LYP/6-31+G(d,p)**

HF = -584.8430213 hartrees

Coordinates:

| Center<br>Number | Atomic<br>Number | Coordinates (Angstroms) |           |           |
|------------------|------------------|-------------------------|-----------|-----------|
|                  |                  | X                       | Y         | Z         |
| 1                | 6                | 0.413527                | -0.165451 | 0.066480  |
| 2                | 6                | -1.177889               | -0.317407 | 2.110760  |
| 3                | 1                | -2.222394               | -0.341141 | 2.439627  |
| 4                | 1                | -0.683654               | -1.194644 | 2.534057  |
| 5                | 1                | -0.707126               | 0.567363  | 2.548833  |
| 6                | 6                | -1.076417               | -0.335106 | 0.573993  |
| 7                | 6                | -1.675108               | -1.643393 | -0.031355 |
| 8                | 6                | -1.944826               | 0.758685  | -0.068371 |
| 9                | 6                | -2.203989               | -1.282749 | -1.432287 |
| 10               | 1                | -2.486021               | -2.017171 | 0.603929  |
| 11               | 1                | -0.936823               | -2.444683 | -0.078737 |
| 12               | 6                | -2.756894               | 0.133469  | -1.309590 |
| 13               | 1                | -1.405272               | -1.284508 | -2.178247 |
| 14               | 1                | -2.981512               | -1.968839 | -1.782060 |
| 15               | 6                | 1.023510                | 1.241503  | 0.225746  |
| 16               | 6                | 1.377509                | -1.176564 | 0.722860  |
| 17               | 6                | 2.488211                | 1.276451  | -0.148615 |
| 18               | 6                | 2.724036                | -1.195222 | -0.014597 |
| 19               | 6                | 3.267666                | 0.191580  | -0.279541 |
| 20               | 1                | 0.401865                | -0.379723 | -1.011800 |
| 21               | 1                | 0.958820                | -2.187964 | 0.741027  |
| 22               | 1                | 1.548774                | -0.886054 | 1.766488  |
| 23               | 1                | 3.453649                | -1.765986 | 0.573886  |
| 24               | 1                | 2.630287                | -1.736991 | -0.968311 |
| 25               | 1                | 2.912051                | 2.263649  | -0.322119 |
| 26               | 1                | 0.502837                | 1.966804  | -0.419000 |
| 27               | 1                | 0.901751                | 1.605643  | 1.258483  |
| 28               | 6                | 4.714699                | 0.280230  | -0.685589 |
| 29               | 1                | 5.017377                | 1.309602  | -0.894196 |
| 30               | 1                | 5.367490                | -0.117459 | 0.101584  |
| 31               | 1                | 4.905497                | -0.320537 | -1.584160 |
| 32               | 6                | -1.921440               | 2.101984  | 0.169546  |
| 33               | 6                | -3.646908               | 0.435633  | -0.229219 |
| 34               | 1                | -2.803918               | 0.769780  | -2.189900 |
| 35               | 1                | -3.883699               | -0.295817 | 0.537271  |
| 36               | 1                | -4.285891               | 1.310724  | -0.256177 |

|    |   |           |          |           |
|----|---|-----------|----------|-----------|
| 37 | 1 | -1.287728 | 2.530794 | 0.940261  |
| 38 | 1 | -2.550482 | 2.795298 | -0.382073 |

-----

**Figure 2a.**

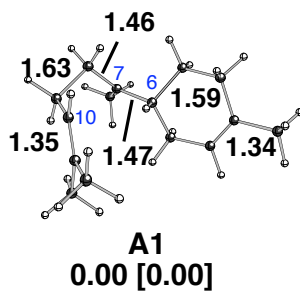

**B3LYP/6-31+G(d,p)//B3LYP/6-31+G(d,p)**

HF = -586.4146838 hartrees (-367975.2140845 kcal/mol)

Imaginary Frequencies: none

Zero-point correction = 0.363052 (Hartree/Particle)

Sum of electronic and thermal Free Energies = -367782.467 kcal/mol (298 Kelvin, 1.0 atm)

**mPW1PW91/6-31+G(d,p)//B3LYP/6-31+G(d,p)**

HF = -586.2752278 hartrees (-367887.7054445 kcal/mol)

**mPWB1K/6-31+G(d,p)//B3LYP/6-31+G(d,p)**

HF = -586.0586615 hartrees

Coordinates:

-----

| Center Number | Atomic Number | Coordinates (Angstroms) |           |           |
|---------------|---------------|-------------------------|-----------|-----------|
|               |               | X                       | Y         | Z         |
| 1             | 6             | 2.294619                | 0.628322  | 1.173158  |
| 2             | 6             | 2.970260                | 0.787724  | 0.024316  |
| 3             | 6             | 2.654425                | -0.041777 | -1.201406 |
| 4             | 6             | 1.731369                | -1.236013 | -0.934600 |
| 5             | 6             | 0.553025                | -0.774265 | 0.026528  |
| 6             | 6             | 1.162984                | -0.350617 | 1.373226  |
| 7             | 1             | 2.224982                | 0.605317  | -1.979775 |
| 8             | 1             | 2.557130                | 1.237877  | 2.034815  |
| 9             | 1             | 1.342710                | -1.636130 | -1.874960 |
| 10            | 1             | 2.278121                | -2.038710 | -0.427973 |
| 11            | 1             | 3.588099                | -0.433500 | -1.627816 |
| 12            | 6             | -1.440478               | -1.893679 | -1.027790 |

-----

|    |   |           |           |           |
|----|---|-----------|-----------|-----------|
| 13 | 6 | -2.691605 | -0.946632 | -0.579133 |
| 14 | 1 | -1.834117 | -2.901840 | -1.170038 |
| 15 | 1 | -1.073306 | -1.484886 | -1.971858 |
| 16 | 6 | -2.495801 | 0.494196  | -0.897898 |
| 17 | 1 | -3.507760 | -1.359740 | -1.181503 |
| 18 | 1 | -2.942733 | -1.134235 | 0.466492  |
| 19 | 6 | -2.515625 | 1.541814  | -0.041576 |
| 20 | 6 | -0.453615 | -1.839979 | 0.040170  |
| 21 | 6 | -2.405946 | 2.951743  | -0.562453 |
| 22 | 1 | -3.296945 | 3.530870  | -0.290204 |
| 23 | 1 | -1.550849 | 3.468415  | -0.108855 |
| 24 | 1 | -2.296328 | 2.985445  | -1.648967 |
| 25 | 6 | -2.683878 | 1.431526  | 1.451372  |
| 26 | 1 | -3.631504 | 1.892539  | 1.756952  |
| 27 | 1 | -2.681426 | 0.406221  | 1.826935  |
| 28 | 1 | -1.893014 | 1.990441  | 1.965940  |
| 29 | 1 | -2.387700 | 0.714523  | -1.959935 |
| 30 | 1 | 0.094914  | 0.094333  | -0.476140 |
| 31 | 6 | -0.511324 | -2.837352 | 1.130001  |
| 32 | 1 | 0.430764  | -3.409785 | 1.121626  |
| 33 | 1 | -0.532640 | -2.351991 | 2.113636  |
| 34 | 1 | -1.343412 | -3.535122 | 1.031417  |
| 35 | 1 | 1.521224  | -1.229945 | 1.926503  |
| 36 | 1 | 0.385929  | 0.108236  | 1.998002  |
| 37 | 6 | 4.073449  | 1.800258  | -0.134457 |
| 38 | 1 | 5.024923  | 1.309212  | -0.373245 |
| 39 | 1 | 3.858248  | 2.489022  | -0.961283 |
| 40 | 1 | 4.213545  | 2.391820  | 0.773496  |

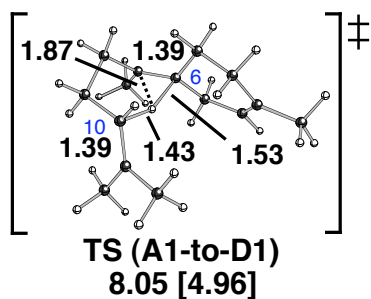

**B3LYP/6-31+G(d,p)//B3LYP/6-31+G(d,p)**

HF = -586.3972994 hartrees (-367964.3053735 kcal/mol)

Imaginary Frequencies: 1 (-923.0860 1/cm)

Zero-point correction = 0.358495 (Hartree/Particle)

Sum of electronic and thermal Free Energies = -367773.2245 kcal/mol (298 Kelvin, 1.0 atm)



**B3LYP/6-31+G(d,p)//B3LYP/6-31+G(d,p):CPCM (solvent=benzene, radii=uaks)**

HF = -586.4302411 hartrees (-367990.840592661 kcal/mol)

**mPW1PW91/6-31+G(d,p)//B3LYP/6-31+G(d,p)**

HF = -586.2627619 hartrees (-367879.88309225 kcal/mol)

**mPWB1K/6-31+G(d,p)//B3LYP/6-31+G(d,p)**

HF = -586.0443193 hartrees

Coordinates:

| Center<br>Number | Atomic<br>Number | Coordinates (Angstroms) |           |           |
|------------------|------------------|-------------------------|-----------|-----------|
|                  |                  | X                       | Y         | Z         |
| 1                | 6                | 2.284004                | -0.468784 | 1.199884  |
| 2                | 6                | 2.775645                | 0.058111  | 0.069191  |
| 3                | 6                | 2.071747                | -0.139263 | -1.253902 |
| 4                | 6                | 1.015805                | -1.255174 | -1.225047 |
| 5                | 6                | 0.163730                | -1.275921 | 0.045398  |
| 6                | 6                | 1.010124                | -1.272245 | 1.313786  |
| 7                | 1                | 1.624236                | 0.813735  | -1.573978 |
| 8                | 1                | 2.826043                | -0.327644 | 2.132831  |
| 9                | 1                | 0.411959                | -1.226958 | -2.133349 |
| 10               | 1                | 1.537531                | -2.222271 | -1.231340 |
| 11               | 1                | 2.809905                | -0.379618 | -2.029032 |
| 12               | 6                | -2.056433               | -1.492060 | -1.113638 |
| 13               | 6                | -2.564899               | -0.002356 | -1.026034 |
| 14               | 1                | -2.921267               | -2.159069 | -1.082894 |
| 15               | 1                | -1.551118               | -1.644031 | -2.068500 |
| 16               | 6                | -1.407791               | 0.960734  | -0.832390 |
| 17               | 1                | -3.087529               | 0.239274  | -1.956869 |
| 18               | 1                | -3.295813               | 0.082131  | -0.218448 |
| 19               | 6                | -1.363483               | 2.014780  | 0.070547  |
| 20               | 6                | -1.159534               | -1.710467 | 0.066541  |
| 21               | 6                | -0.323464               | 3.081184  | -0.064515 |
| 22               | 1                | -0.813180               | 4.062692  | -0.115910 |
| 23               | 1                | 0.315584                | 3.108794  | 0.826956  |
| 24               | 1                | 0.299979                | 2.957245  | -0.951301 |
| 25               | 6                | -2.293756               | 2.151552  | 1.234199  |
| 26               | 1                | -3.043165               | 2.920064  | 0.995598  |
| 27               | 1                | -2.831543               | 1.235170  | 1.479495  |
| 28               | 1                | -1.761133               | 2.508186  | 2.121479  |
| 29               | 1                | -0.774584               | 1.086266  | -1.712765 |
| 30               | 1                | -0.577065               | 0.057093  | -0.106576 |
| 31               | 6                | -1.848189               | -2.188808 | 1.311495  |
| 32               | 1                | -1.957186               | -3.280083 | 1.223282  |

|    |   |           |           |           |
|----|---|-----------|-----------|-----------|
| 33 | 1 | -1.303911 | -1.993880 | 2.234416  |
| 34 | 1 | -2.864228 | -1.790079 | 1.397334  |
| 35 | 1 | 1.253419  | -2.314560 | 1.576120  |
| 36 | 1 | 0.430536  | -0.891769 | 2.162627  |
| 37 | 6 | 4.049242  | 0.861743  | 0.035613  |
| 38 | 1 | 4.806172  | 0.367427  | -0.586042 |
| 39 | 1 | 3.881605  | 1.853006  | -0.405291 |
| 40 | 1 | 4.468258  | 1.000727  | 1.035388  |

---

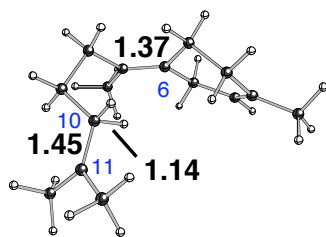

**D1**  
**3.92 [3.09]**

**B3LYP/6-31+G(d,p)//B3LYP/6-31+G(d,p)**

HF = -586.4067226 hartrees (-367970.2184315 kcal/mol)

Imaginary Frequencies: none

Zero-point correction = 0.361338 (Hartree/Particle)

Sum of electronic and thermal Free Energies = -367779.3364 kcal/mol (298 Kelvin, 1.0 atm)

**mPW1PW91/6-31+G(d,p)//B3LYP/6-31+G(d,p)**

HF = -586.2685837 hartrees (-367883.53627175 kcal/mol)

**mPWB1K/6-31+G(d,p)//B3LYP/6-31+G(d,p)**

HF = -586.0514714 hartrees

Coordinates:

---

| Center Number | Atomic Number | Coordinates (Angstroms) |           |           |
|---------------|---------------|-------------------------|-----------|-----------|
|               |               | X                       | Y         | Z         |
| 1             | 6             | -2.936450               | -0.041459 | -1.041774 |
| 2             | 6             | -2.958568               | 0.966144  | -0.157805 |
| 3             | 6             | -2.075372               | 0.932395  | 1.070325  |
| 4             | 6             | -1.555130               | -0.482126 | 1.393502  |
| 5             | 6             | -1.025293               | -1.196944 | 0.172418  |
| 6             | 6             | -2.032826               | -1.250019 | -0.956646 |
| 7             | 1             | -1.234116               | 1.632177  | 0.937361  |
| 8             | 1             | -3.597730               | -0.010427 | -1.905665 |

---

|    |   |           |           |           |
|----|---|-----------|-----------|-----------|
| 9  | 1 | -0.832570 | -0.438894 | 2.210760  |
| 10 | 1 | -2.406446 | -1.071168 | 1.766002  |
| 11 | 1 | -2.633162 | 1.310770  | 1.936188  |
| 12 | 6 | 1.211337  | -1.845902 | 1.189854  |
| 13 | 6 | 2.430029  | -0.964231 | 0.818783  |
| 14 | 1 | 1.571493  | -2.869077 | 1.351383  |
| 15 | 1 | 0.800165  | -1.507475 | 2.142805  |
| 16 | 6 | 1.940687  | 0.468857  | 0.531397  |
| 17 | 1 | 3.162432  | -0.947726 | 1.633366  |
| 18 | 1 | 2.929949  | -1.383656 | -0.059234 |
| 19 | 6 | 2.764903  | 1.392518  | -0.215361 |
| 20 | 6 | 0.180027  | -1.835731 | 0.083594  |
| 21 | 6 | 2.653287  | 2.847491  | 0.015167  |
| 22 | 1 | 3.641347  | 3.229837  | 0.320698  |
| 23 | 1 | 2.439442  | 3.363669  | -0.931268 |
| 24 | 1 | 1.915861  | 3.118228  | 0.770918  |
| 25 | 6 | 3.720750  | 0.923328  | -1.242914 |
| 26 | 1 | 4.642307  | 0.613323  | -0.720625 |
| 27 | 1 | 3.363918  | 0.031500  | -1.766379 |
| 28 | 1 | 3.995158  | 1.706057  | -1.952553 |
| 29 | 1 | 1.514632  | 0.948095  | 1.419130  |
| 30 | 1 | 1.033592  | 0.315816  | -0.142179 |
| 31 | 6 | 0.557771  | -2.644944 | -1.147234 |
| 32 | 1 | -0.128445 | -3.489071 | -1.285124 |
| 33 | 1 | 0.524472  | -2.061942 | -2.074390 |
| 34 | 1 | 1.562804  | -3.065687 | -1.056205 |
| 35 | 1 | -2.649675 | -2.156911 | -0.824426 |
| 36 | 1 | -1.535948 | -1.392682 | -1.922229 |
| 37 | 6 | -3.848504 | 2.171191  | -0.314863 |
| 38 | 1 | -4.558996 | 2.246363  | 0.518082  |
| 39 | 1 | -3.261749 | 3.099492  | -0.310295 |
| 40 | 1 | -4.418621 | 2.135985  | -1.246772 |

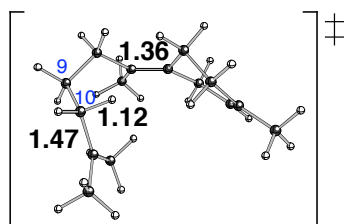

**TS (D1-to-D2)**  
**8.54 [7.34]**

**B3LYP/6-31+G(d,p)//B3LYP/6-31+G(d,p)**

HF = -586.3994222 hartrees (-367965.6374305 kcal/mol)

Imaginary Frequencies: 1 (-54.9328 1/cm)  
Zero-point correction = 0.361407 (Hartree/Particle)  
Sum of electronic and thermal Free Energies = -367772.7331 kcal/mol (298 Kelvin,  
1.0 atm)

**mPW1PW91/6-31+G(d,p)//B3LYP/6-31+G(d,p)**  
HF = -586.2618917 hartrees (-367879.33704175 kcal/mol)

**mPWB1K/6-31+G(d,p)//B3LYP/6-31+G(d,p)**  
HF = -586.0479467 hartrees

Coordinates:

| Center<br>Number | Atomic<br>Number | Coordinates (Angstroms) |           |           |
|------------------|------------------|-------------------------|-----------|-----------|
|                  |                  | X                       | Y         | Z         |
| 1                | 6                | 0.709598                | -1.324523 | -0.182286 |
| 2                | 6                | -1.012421               | -2.508406 | 1.251862  |
| 3                | 1                | -2.043366               | -2.255568 | 1.528380  |
| 4                | 1                | -1.012065               | -3.588626 | 1.054509  |
| 5                | 1                | -0.384103               | -2.342717 | 2.127705  |
| 6                | 6                | -0.564751               | -1.761779 | 0.009981  |
| 7                | 6                | -1.657274               | -1.677941 | -1.044754 |
| 8                | 6                | -2.091507               | 1.635661  | 0.371233  |
| 9                | 6                | -2.760785               | -0.629037 | -0.772235 |
| 10               | 1                | -2.156044               | -2.654268 | -1.100257 |
| 11               | 1                | -1.246671               | -1.493809 | -2.040582 |
| 12               | 6                | -2.282526               | 0.849272  | -0.851916 |
| 13               | 1                | -3.547136               | -0.747384 | -1.524091 |
| 14               | 1                | -3.243092               | -0.817628 | 0.192584  |
| 15               | 6                | -2.257890               | 3.097068  | 0.324600  |
| 16               | 1                | -3.264499               | 3.289718  | 0.744616  |
| 17               | 1                | -1.559891               | 3.619844  | 0.985092  |
| 18               | 1                | -2.248846               | 3.508515  | -0.686744 |
| 19               | 6                | -1.662308               | 0.988822  | 1.606974  |
| 20               | 1                | -1.433165               | 1.677952  | 2.418755  |
| 21               | 1                | -2.403731               | 0.244942  | 1.931776  |
| 22               | 1                | -0.786029               | 0.355141  | 1.346486  |
| 23               | 6                | 1.809075                | -1.468280 | 0.853423  |
| 24               | 6                | 1.250257                | -0.728477 | -1.466498 |
| 25               | 6                | 2.751289                | -0.283751 | 0.891285  |
| 26               | 6                | 1.901828                | 0.651250  | -1.245741 |
| 27               | 6                | 2.798742                | 0.692383  | -0.027445 |
| 28               | 1                | 0.503683                | -0.665567 | -2.261318 |
| 29               | 1                | 2.031808                | -1.408789 | -1.834042 |
| 30               | 1                | 2.481963                | 0.920494  | -2.137894 |

|    |   |           |           |           |
|----|---|-----------|-----------|-----------|
| 31 | 1 | 1.131358  | 1.437580  | -1.160292 |
| 32 | 1 | 3.432611  | -0.249882 | 1.739722  |
| 33 | 1 | 1.406045  | -1.630537 | 1.856887  |
| 34 | 1 | 2.385985  | -2.381834 | 0.629238  |
| 35 | 6 | 3.743625  | 1.861806  | 0.072193  |
| 36 | 1 | 4.325324  | 1.835875  | 0.997260  |
| 37 | 1 | 4.445285  | 1.872674  | -0.771468 |
| 38 | 1 | 3.200889  | 2.816150  | 0.038404  |
| 39 | 1 | -1.229473 | 0.857458  | -1.226932 |
| 40 | 1 | -2.836552 | 1.435856  | -1.591851 |

---

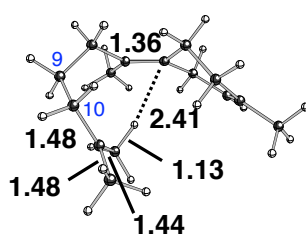

**D2**  
**8.18 [6.83]**

**B3LYP/6-31+G(d,p)//B3LYP/6-31+G(d,p)**

HF = -586.3998298 hartrees (-367965.8931995 kcal/mol)

Imaginary Frequencies: none

Zero-point correction = 0.361237 (Hartree/Particle)

Sum of electronic and thermal Free Energies = -367773.8532 kcal/mol (298 Kelvin, 1.0 atm)

**mPW1PW91/6-31+G(d,p)//B3LYP/6-31+G(d,p)**

HF = -586.262534 hartrees (-367879.740085 kcal/mol)

**mPWB1K/6-31+G(d,p)//B3LYP/6-31+G(d,p)**

HF = -586.0475994 hartrees

Coordinates:

---

| Center Number | Atomic Number | Coordinates (Angstroms) |           |           |
|---------------|---------------|-------------------------|-----------|-----------|
|               |               | X                       | Y         | Z         |
| 1             | 6             | -0.590618               | -1.345602 | 0.293722  |
| 2             | 6             | 1.086309                | -2.581597 | -1.150153 |
| 3             | 1             | 2.040910                | -2.256756 | -1.582441 |
| 4             | 1             | 1.241954                | -3.618568 | -0.824176 |
| 5             | 1             | 0.349718                | -2.601915 | -1.953127 |
| 6             | 6             | 0.691048                | -1.725048 | 0.035589  |

---

|    |   |           |           |           |
|----|---|-----------|-----------|-----------|
| 7  | 6 | 1.861390  | -1.466096 | 0.979766  |
| 8  | 6 | 1.852430  | 1.716207  | -0.456474 |
| 9  | 6 | 2.952700  | -0.467869 | 0.516777  |
| 10 | 1 | 2.369794  | -2.428215 | 1.126031  |
| 11 | 1 | 1.518667  | -1.161882 | 1.972254  |
| 12 | 6 | 2.596090  | 1.028756  | 0.619287  |
| 13 | 1 | 3.822157  | -0.617299 | 1.164882  |
| 14 | 1 | 3.304506  | -0.703121 | -0.494149 |
| 15 | 6 | 1.667448  | 3.177165  | -0.359345 |
| 16 | 1 | 2.320762  | 3.632382  | -1.124592 |
| 17 | 1 | 0.650550  | 3.466033  | -0.649757 |
| 18 | 1 | 1.932747  | 3.594042  | 0.613353  |
| 19 | 6 | 1.275938  | 0.990286  | -1.564104 |
| 20 | 1 | 0.774958  | 1.604588  | -2.311243 |
| 21 | 1 | 1.990407  | 0.291614  | -2.017536 |
| 22 | 1 | 0.553849  | 0.269491  | -1.080768 |
| 23 | 6 | -1.767662 | -1.690894 | -0.597660 |
| 24 | 6 | -1.044404 | -0.586602 | 1.523929  |
| 25 | 6 | -2.779943 | -0.571591 | -0.710029 |
| 26 | 6 | -1.780201 | 0.718887  | 1.159148  |
| 27 | 6 | -2.795260 | 0.532457  | 0.052696  |
| 28 | 1 | -0.232745 | -0.373923 | 2.222284  |
| 29 | 1 | -1.754539 | -1.229245 | 2.063366  |
| 30 | 1 | -2.278961 | 1.110828  | 2.054963  |
| 31 | 1 | -1.060355 | 1.504515  | 0.869034  |
| 32 | 1 | -3.543928 | -0.701674 | -1.474456 |
| 33 | 1 | -1.450899 | -1.981686 | -1.602716 |
| 34 | 1 | -2.265623 | -2.586288 | -0.187657 |
| 35 | 6 | -3.814584 | 1.628699  | -0.119015 |
| 36 | 1 | -4.478402 | 1.436363  | -0.965733 |
| 37 | 1 | -4.432395 | 1.734395  | 0.781724  |
| 38 | 1 | -3.330890 | 2.601498  | -0.280967 |
| 39 | 1 | 2.000934  | 1.225373  | 1.533583  |
| 40 | 1 | 3.492746  | 1.646498  | 0.803041  |

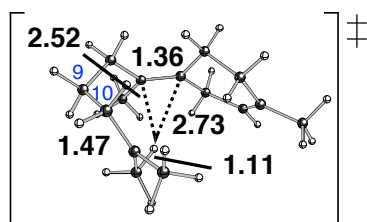

**TS (D2-to-D3)**  
**8.53 [7.18]**

**B3LYP/6-31+G(d,p)//B3LYP/6-31+G(d,p)**

HF = -586.3991759 hartrees (-367965.48287725 kcal/mol)

Imaginary Frequencies: 1 (-115.0768 1/cm)

Zero-point correction = 0.361134 (Hartree/Particle)

Sum of electronic and thermal Free Energies = -367772.7538 kcal/mol (298 Kelvin, 1.0 atm)

**B3LYP/6-31+G(d,p)//B3LYP/6-31+G(d,p):CPCM (solvent=benzene, radii=uaks)**

HF = -586.4352928 hartrees (-367994.010584928 kcal/mol)

**mPW1PW91/6-31+G(d,p)//B3LYP/6-31+G(d,p)**

HF = -586.2618644 hartrees (-367879.319911 kcal/mol)

**mPWB1K/6-31+G(d,p)//B3LYP/6-31+G(d,p)**

HF = -586.0482332 hartrees

Coordinates:

| Center<br>Number | Atomic<br>Number | Coordinates (Angstroms) |           |           |
|------------------|------------------|-------------------------|-----------|-----------|
|                  |                  | X                       | Y         | Z         |
| 1                | 6                | 2.685394                | -0.679494 | 0.768997  |
| 2                | 6                | 2.786759                | 0.391316  | -0.033549 |
| 3                | 6                | 1.830562                | 0.582630  | -1.190930 |
| 4                | 6                | 1.026377                | -0.688563 | -1.526561 |
| 5                | 6                | 0.495078                | -1.377340 | -0.284909 |
| 6                | 6                | 1.629562                | -1.757472 | 0.649711  |
| 7                | 1                | 1.149007                | 1.423126  | -0.970358 |
| 8                | 1                | 3.410638                | -0.813522 | 1.569960  |
| 9                | 1                | 0.247938                | -0.451715 | -2.254694 |
| 10               | 1                | 1.707917                | -1.391861 | -2.025944 |
| 11               | 1                | 2.390300                | 0.901623  | -2.080066 |
| 12               | 6                | -1.937828               | -1.367445 | -1.023324 |
| 13               | 6                | -2.958768               | -0.292787 | -0.572989 |
| 14               | 1                | -2.511465               | -2.291364 | -1.173432 |
| 15               | 1                | -1.561126               | -1.092056 | -2.011712 |
| 16               | 6                | -2.461962               | 1.160134  | -0.645253 |
| 17               | 1                | -3.823203               | -0.353452 | -1.242249 |
| 18               | 1                | -3.348423               | -0.514897 | 0.426306  |
| 19               | 6                | -1.698543               | 1.791668  | 0.440755  |
| 20               | 6                | -0.805917               | -1.677803 | -0.050964 |
| 21               | 6                | -1.461438               | 1.130472  | 1.715661  |
| 22               | 1                | -1.053108               | 1.777093  | 2.492162  |
| 23               | 1                | -2.328831               | 0.559632  | 2.063436  |
| 24               | 1                | -0.719559               | 0.340937  | 1.452670  |
| 25               | 6                | -1.167248               | 3.152018  | 0.237955  |
| 26               | 1                | -1.288390               | 3.534619  | -0.775611 |

|    |   |           |           |           |
|----|---|-----------|-----------|-----------|
| 27 | 1 | -1.674174 | 3.820945  | 0.952690  |
| 28 | 1 | -0.111024 | 3.182899  | 0.539715  |
| 29 | 1 | -3.326191 | 1.857933  | -0.723968 |
| 30 | 1 | -1.933791 | 1.370281  | -1.590098 |
| 31 | 6 | -1.276151 | -2.496987 | 1.138192  |
| 32 | 1 | -1.427580 | -3.541272 | 0.834453  |
| 33 | 1 | -0.581271 | -2.505724 | 1.978622  |
| 34 | 1 | -2.245779 | -2.150565 | 1.515703  |
| 35 | 1 | 2.101754  | -2.682651 | 0.278006  |
| 36 | 1 | 1.269417  | -2.009711 | 1.650752  |
| 37 | 6 | 3.855527  | 1.439926  | 0.138851  |
| 38 | 1 | 4.514922  | 1.476039  | -0.737631 |
| 39 | 1 | 3.420257  | 2.443470  | 0.241315  |
| 40 | 1 | 4.473333  | 1.248543  | 1.020123  |

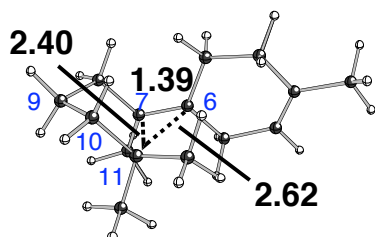

**D3**  
**1.08 [-2.47]**

**B3LYP/6-31+G(d,p)//B3LYP/6-31+G(d,p)**

HF = -586.4148545 hartrees (-367975.32119875 kcal/mol)

Imaginary Frequencies: none

Zero-point correction = 0.364943 (Hartree/Particle)

Sum of electronic and thermal Free Energies = -367779.0434 kcal/mol (298 Kelvin, 1.0 atm)

**mPW1PW91/6-31+G(d,p)//B3LYP/6-31+G(d,p)**

HF = -586.2810515 hartrees (-367891.35981625 kcal/mol)

**mPWB1K/6-31+G(d,p)//B3LYP/6-31+G(d,p)**

HF = -586.0699507 hartrees

Coordinates:

| Center Number | Atomic Number | Coordinates (Angstroms) |           |           |
|---------------|---------------|-------------------------|-----------|-----------|
|               |               | X                       | Y         | Z         |
| 1             | 6             | 0.200341                | -0.753922 | -0.200616 |



|    |   |           |           |           |
|----|---|-----------|-----------|-----------|
| 2  | 6 | -1.709192 | -2.046143 | 0.828698  |
| 3  | 1 | -2.799625 | -1.996338 | 0.872597  |
| 4  | 1 | -1.454437 | -3.071446 | 0.526658  |
| 5  | 1 | -1.314746 | -1.902890 | 1.834449  |
| 6  | 6 | -1.147713 | -1.102311 | -0.213203 |
| 7  | 6 | -2.045777 | -0.913785 | -1.416932 |
| 8  | 6 | -1.439787 | 1.133862  | 0.592609  |
| 9  | 6 | -3.074185 | 0.201099  | -1.127574 |
| 10 | 1 | -2.566158 | -1.856005 | -1.621750 |
| 11 | 1 | -1.483201 | -0.661584 | -2.317370 |
| 12 | 6 | -2.298659 | 1.415465  | -0.610837 |
| 13 | 1 | -3.632667 | 0.459149  | -2.031613 |
| 14 | 1 | -3.810255 | -0.133525 | -0.389174 |
| 15 | 6 | -0.231226 | 2.007915  | 0.770964  |
| 16 | 1 | -0.603122 | 2.971426  | 1.153880  |
| 17 | 1 | 0.472317  | 1.627410  | 1.514825  |
| 18 | 1 | 0.286921  | 2.217047  | -0.163457 |
| 19 | 6 | -2.118024 | 0.765684  | 1.877823  |
| 20 | 1 | -1.434442 | 0.300140  | 2.592625  |
| 21 | 1 | -2.436965 | 1.712982  | 2.339071  |
| 22 | 1 | -3.005280 | 0.146302  | 1.757006  |
| 23 | 6 | 1.070077  | -1.165792 | 0.964132  |
| 24 | 6 | 0.923197  | -0.240832 | -1.423317 |
| 25 | 6 | 2.511125  | -0.729147 | 0.918945  |
| 26 | 6 | 2.241944  | 0.524249  | -1.200957 |
| 27 | 6 | 3.063791  | 0.027070  | -0.037711 |
| 28 | 1 | 0.264192  | 0.330608  | -2.079824 |
| 29 | 1 | 1.162564  | -1.161150 | -1.983006 |
| 30 | 1 | 2.830560  | 0.452772  | -2.123292 |
| 31 | 1 | 2.055761  | 1.599129  | -1.072892 |
| 32 | 1 | 3.121035  | -1.075106 | 1.750524  |
| 33 | 1 | 0.612201  | -0.831849 | 1.907542  |
| 34 | 1 | 1.024004  | -2.265774 | 1.032390  |
| 35 | 6 | 4.509864  | 0.444487  | -0.012639 |
| 36 | 1 | 5.017875  | 0.092808  | 0.888623  |
| 37 | 1 | 5.045732  | 0.049234  | -0.884512 |
| 38 | 1 | 4.604453  | 1.537066  | -0.054112 |
| 39 | 1 | -1.690094 | 1.848469  | -1.411222 |
| 40 | 1 | -3.001282 | 2.203739  | -0.294279 |

---

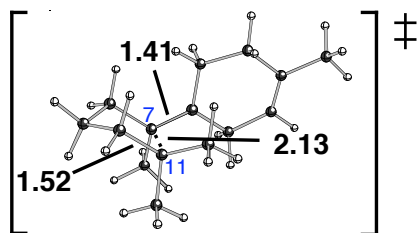

**TS (D3-to-E1)**  
**1.59 [-3.10]**

**B3LYP/6-31+G(d,p)//B3LYP/6-31+G(d,p)**

HF = -586.4144347 hartrees (-367975.05777425 kcal/mol)

Imaginary Frequencies: 1 (-113.5264 1/cm)

Zero-point correction = 0.365337 (Hartree/Particle)

Sum of electronic and thermal Free Energies = -367777.9101 kcal/mol (298 Kelvin, 1.0 atm)

**mPW1PW91/6-31+G(d,p)//B3LYP/6-31+G(d,p)**

HF = -586.2824575 hartrees (-367892.24208125 kcal/mol)

**mPWB1K/6-31+G(d,p)//B3LYP/6-31+G(d,p)**

HF = -586.0717779 hartrees

Coordinates:

| Center Number | Atomic Number | Coordinates (Angstroms) |           |           |
|---------------|---------------|-------------------------|-----------|-----------|
|               |               | X                       | Y         | Z         |
| 1             | 6             | -0.249180               | 0.625432  | -0.380880 |
| 2             | 6             | 1.660897                | 2.143116  | 0.249125  |
| 3             | 1             | 2.751839                | 2.146928  | 0.280637  |
| 4             | 1             | 1.359095                | 3.006121  | -0.358009 |
| 5             | 1             | 1.289923                | 2.309793  | 1.259448  |
| 6             | 6             | 1.133804                | 0.884808  | -0.429643 |
| 7             | 6             | 1.998386                | 0.460824  | -1.616331 |
| 8             | 6             | 1.510209                | -0.791048 | 0.821527  |
| 9             | 6             | 3.106181                | -0.476792 | -1.105543 |
| 10            | 1             | 2.418734                | 1.358511  | -2.081999 |
| 11            | 1             | 1.420414                | -0.050789 | -2.388362 |
| 12            | 6             | 2.388455                | -1.483844 | -0.209097 |
| 13            | 1             | 3.626817                | -0.970650 | -1.930305 |
| 14            | 1             | 3.862047                | 0.081598  | -0.542394 |
| 15            | 6             | 0.330151                | -1.619956 | 1.291654  |
| 16            | 1             | 0.745251                | -2.436423 | 1.898597  |
| 17            | 1             | -0.359057               | -1.068551 | 1.935270  |
| 18            | 1             | -0.220023               | -2.084550 | 0.473996  |

|    |   |           |           |           |
|----|---|-----------|-----------|-----------|
| 19 | 6 | 2.235216  | -0.145333 | 1.979833  |
| 20 | 1 | 1.582912  | 0.485484  | 2.588789  |
| 21 | 1 | 2.564381  | -0.966553 | 2.631837  |
| 22 | 1 | 3.121834  | 0.418389  | 1.692319  |
| 23 | 6 | -1.116835 | 1.363046  | 0.597540  |
| 24 | 6 | -0.960960 | -0.218018 | -1.394918 |
| 25 | 6 | -2.562461 | 0.948666  | 0.674999  |
| 26 | 6 | -2.285045 | -0.881804 | -0.969458 |
| 27 | 6 | -3.113327 | -0.058114 | -0.014012 |
| 28 | 1 | -0.297239 | -0.945748 | -1.864404 |
| 29 | 1 | -1.190487 | 0.517435  | -2.188857 |
| 30 | 1 | -2.863569 | -1.087067 | -1.877597 |
| 31 | 1 | -2.097368 | -1.868741 | -0.525700 |
| 32 | 1 | -3.171444 | 1.531465  | 1.361837  |
| 33 | 1 | -0.656139 | 1.331201  | 1.595874  |
| 34 | 1 | -1.046288 | 2.431498  | 0.325337  |
| 35 | 6 | -4.559822 | -0.448459 | 0.125695  |
| 36 | 1 | -5.074580 | 0.162458  | 0.870967  |
| 37 | 1 | -5.087399 | -0.341493 | -0.830099 |
| 38 | 1 | -4.654630 | -1.500907 | 0.421654  |
| 39 | 1 | 1.781940  | -2.162651 | -0.818726 |
| 40 | 1 | 3.099032  | -2.111909 | 0.346936  |

---

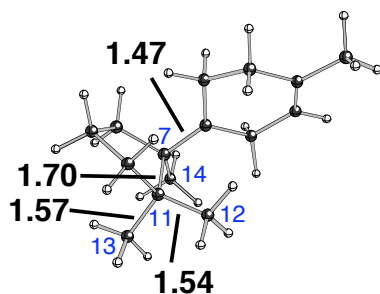

**E1**  
**-0.20 [-7.07]**

**B3LYP/6-31+G(d,p)//B3LYP/6-31+G(d,p)**

HF = -586.4181428 hartrees (-367977.384607 kcal/mol)

Imaginary Frequencies: none

Zero-point correction = 0.366199 (Hartree/Particle)

Sum of electronic and thermal Free Energies = -367779.2009 kcal/mol (298 Kelvin, 1.0 atm)

**mPW1PW91/6-31+G(d,p)//B3LYP/6-31+G(d,p)**

HF = -586.289635 hartrees (-367896.7459625 kcal/mol)

**mPWB1K/6-31+G(d,p)//B3LYP/6-31+G(d,p)**

HF = -586.0819359 hartrees

Coordinates:

| -----  |        |                         |           |           |
|--------|--------|-------------------------|-----------|-----------|
| Center | Atomic | Coordinates (Angstroms) |           |           |
| Number | Number | X                       | Y         | Z         |
| -----  |        |                         |           |           |
| 1      | 6      | 0.280553                | -0.272378 | -0.647829 |
| 2      | 6      | -1.596000               | -1.851705 | -1.134618 |
| 3      | 1      | -2.681273               | -1.912128 | -1.206448 |
| 4      | 1      | -1.195362               | -2.066356 | -2.131013 |
| 5      | 1      | -1.266398               | -2.644125 | -0.458368 |
| 6      | 6      | -1.175050               | -0.438270 | -0.681039 |
| 7      | 6      | -1.913941               | 0.687920  | -1.479739 |
| 8      | 6      | -1.683243               | -0.101731 | 0.907161  |
| 9      | 6      | -2.293128               | 1.841037  | -0.509930 |
| 10     | 1      | -2.809583               | 0.241990  | -1.918464 |
| 11     | 1      | -1.313187               | 1.033719  | -2.325993 |
| 12     | 6      | -1.777202               | 1.435354  | 0.884101  |
| 13     | 1      | -1.874096               | 2.800020  | -0.828864 |
| 14     | 1      | -3.377984               | 1.975084  | -0.497793 |
| 15     | 6      | -0.760587               | -0.630245 | 2.011180  |
| 16     | 1      | -1.203154               | -0.395971 | 2.984636  |
| 17     | 1      | -0.647311               | -1.718878 | 1.970993  |
| 18     | 1      | 0.236864                | -0.178187 | 1.992845  |
| 19     | 6      | -3.079975               | -0.722662 | 1.079437  |
| 20     | 1      | -3.053291               | -1.813946 | 1.108757  |
| 21     | 1      | -3.473062               | -0.380403 | 2.043306  |
| 22     | 1      | -3.788507               | -0.409952 | 0.308544  |
| 23     | 6      | 1.187418                | -1.432364 | -0.503407 |
| 24     | 6      | 0.957222                | 1.026282  | -0.848775 |
| 25     | 6      | 2.627486                | -1.150575 | -0.165377 |
| 26     | 6      | 2.197815                | 1.272638  | 0.038434  |
| 27     | 6      | 3.107033                | 0.068004  | 0.119534  |
| 28     | 1      | -0.797119               | 1.878468  | 1.091097  |
| 29     | 1      | 0.276472                | 1.875010  | -0.857139 |
| 30     | 1      | 1.324222                | 0.917103  | -1.891886 |
| 31     | 1      | 2.738156                | 2.127805  | -0.380864 |
| 32     | 1      | 1.888510                | 1.583864  | 1.046186  |
| 33     | 1      | 3.273028                | -2.022988 | -0.114398 |
| 34     | 1      | 0.745912                | -2.168924 | 0.181330  |
| 35     | 1      | 1.109361                | -1.951924 | -1.481524 |
| 36     | 6      | 4.527087                | 0.314875  | 0.546712  |
| 37     | 1      | 5.094080                | -0.615465 | 0.624483  |
| 38     | 1      | 5.040274                | 0.974023  | -0.163917 |

|    |   |           |          |          |
|----|---|-----------|----------|----------|
| 39 | 1 | 4.557685  | 0.816955 | 1.521925 |
| 40 | 1 | -2.437168 | 1.778126 | 1.687495 |

**Figure 2b.**

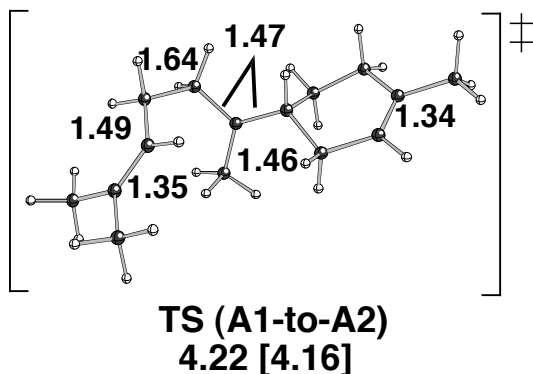

**B3LYP/6-31+G(d,p)//B3LYP/6-31+G(d,p)**

HF = -586.4074559 hartrees (-367970.67857725 kcal/mol)

Imaginary Frequencies: 1 (-97.7772 1/cm)

Zero-point correction = 0.362544 (Hartree/Particle)

Sum of electronic and thermal Free Energies = -367777.8473 kcal/mol (298 Kelvin, 1.0 atm)

**mPW1PW91/6-31+G(d,p)//B3LYP/6-31+G(d,p)**

HF = -586.2680972 hartrees (-367883.230993 kcal/mol)

**mPWB1K/6-31+G(d,p)//B3LYP/6-31+G(d,p)**

HF = -586.0509338 hartrees

Coordinates:

| Center Number | Atomic Number | Coordinates (Angstroms) |           |           |
|---------------|---------------|-------------------------|-----------|-----------|
|               |               | X                       | Y         | Z         |
| 1             | 6             | 2.862342                | 1.465698  | 0.086356  |
| 2             | 6             | 3.832733                | 0.567978  | -0.141967 |
| 3             | 6             | 3.559641                | -0.919400 | -0.100194 |
| 4             | 6             | 2.203769                | -1.297618 | 0.509948  |
| 5             | 6             | 1.094069                | -0.313974 | -0.077507 |
| 6             | 6             | 1.423292                | 1.121447  | 0.382786  |
| 7             | 1             | 3.651986                | -1.338308 | -1.112281 |
| 8             | 1             | 3.097635                | 2.527007  | 0.050086  |
| 9             | 1             | 1.966997                | -2.342354 | 0.288232  |
| 10            | 1             | 2.219478                | -1.176606 | 1.597779  |
| 11            | 1             | 4.335668                | -1.417902 | 0.496931  |

|    |   |           |           |           |
|----|---|-----------|-----------|-----------|
| 12 | 6 | -0.899971 | -1.802934 | -0.561940 |
| 13 | 6 | -2.324988 | -1.212406 | -1.118448 |
| 14 | 1 | -1.174090 | -2.710901 | -0.013365 |
| 15 | 1 | -0.280440 | -2.074949 | -1.417282 |
| 16 | 6 | -2.675275 | 0.214641  | -0.848559 |
| 17 | 1 | -2.237834 | -1.361040 | -2.199091 |
| 18 | 1 | -3.100318 | -1.886833 | -0.758215 |
| 19 | 6 | -3.767147 | 0.677185  | -0.197252 |
| 20 | 6 | -0.182013 | -0.899879 | 0.340562  |
| 21 | 6 | -4.047084 | 2.158563  | -0.139803 |
| 22 | 1 | -5.002277 | 2.383047  | -0.630251 |
| 23 | 1 | -4.145925 | 2.500060  | 0.897888  |
| 24 | 1 | -3.268311 | 2.748833  | -0.629301 |
| 25 | 6 | -4.809461 | -0.184800 | 0.468697  |
| 26 | 1 | -5.768331 | -0.083153 | -0.054524 |
| 27 | 1 | -4.560354 | -1.247117 | 0.499964  |
| 28 | 1 | -4.983889 | 0.155157  | 1.496336  |
| 29 | 1 | -2.015027 | 0.956051  | -1.301693 |
| 30 | 1 | 1.182346  | -0.382334 | -1.168342 |
| 31 | 6 | -0.801179 | -0.572539 | 1.625238  |
| 32 | 1 | -0.124156 | -0.154236 | 2.369422  |
| 33 | 1 | -1.535144 | 0.221110  | 1.345450  |
| 34 | 1 | -1.401568 | -1.388180 | 2.035379  |
| 35 | 1 | 1.217153  | 1.248519  | 1.453320  |
| 36 | 1 | 0.761369  | 1.822742  | -0.140320 |
| 37 | 6 | 5.247444  | 0.967260  | -0.468221 |
| 38 | 1 | 5.945885  | 0.592413  | 0.290169  |
| 39 | 1 | 5.564716  | 0.540767  | -1.428262 |
| 40 | 1 | 5.357415  | 2.052859  | -0.526194 |

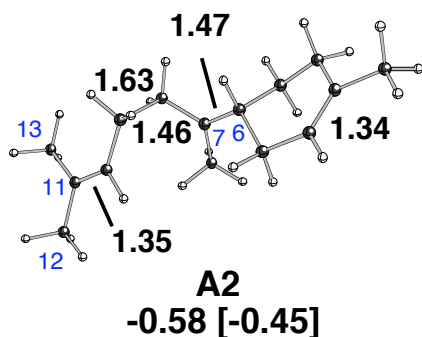

**B3LYP/6-31+G(d,p)//B3LYP/6-31+G(d,p)**

HF = -586.4157364 hartrees (-367975.874591 kcal/mol)

Imaginary Frequencies: none

Zero-point correction = 0.363176 (Hartree/Particle)

Sum of electronic and thermal Free Energies = -367783.3085 kcal/mol (298 Kelvin.  
1.0 atm)

**mPW1PW91/6-31+G(d,p)//B3LYP/6-31+G(d,p)**

HF = -586.2760635 hartrees (-367888.22984625 kcal/mol)

**mPWB1K/6-31+G(d,p)//B3LYP/6-31+G(d,p)**

HF = -586.0588449 hartrees

Coordinates:

| Center<br>Number | Atomic<br>Number | Coordinates (Angstroms) |           |           |
|------------------|------------------|-------------------------|-----------|-----------|
|                  |                  | X                       | Y         | Z         |
| 1                | 6                | 3.098581                | 1.381004  | -0.161706 |
| 2                | 6                | 3.990770                | 0.382409  | -0.242966 |
| 3                | 6                | 3.599710                | -1.051069 | 0.041263  |
| 4                | 6                | 2.227784                | -1.209957 | 0.708666  |
| 5                | 6                | 1.191843                | -0.258047 | -0.022909 |
| 6                | 6                | 1.641987                | 1.208823  | 0.192147  |
| 7                | 1                | 3.640758                | -1.632935 | -0.890635 |
| 8                | 1                | 3.415221                | 2.399630  | -0.375014 |
| 9                | 1                | 1.903165                | -2.254085 | 0.662358  |
| 10               | 1                | 2.275472                | -0.918886 | 1.763055  |
| 11               | 1                | 4.344865                | -1.508967 | 0.706060  |
| 12               | 6                | -1.057169               | -1.369800 | -0.354776 |
| 13               | 6                | -1.908976               | -0.315628 | -1.265492 |
| 14               | 1                | -1.782093               | -1.949803 | 0.219051  |
| 15               | 1                | -0.526098               | -2.004898 | -1.068958 |
| 16               | 6                | -2.809779               | 0.617740  | -0.528120 |
| 17               | 1                | -1.193328               | 0.234212  | -1.882063 |
| 18               | 1                | -2.464142               | -0.983545 | -1.928258 |
| 19               | 6                | -4.106373               | 0.398588  | -0.203545 |
| 20               | 6                | -0.136038               | -0.620266 | 0.487052  |
| 21               | 6                | -4.921697               | 1.474810  | 0.463882  |
| 22               | 1                | -5.779666               | 1.745599  | -0.163867 |
| 23               | 1                | -5.336160               | 1.117658  | 1.414745  |
| 24               | 1                | -4.340219               | 2.380041  | 0.655046  |
| 25               | 6                | -4.849620               | -0.880494 | -0.484412 |
| 26               | 1                | -5.711724               | -0.679463 | -1.132296 |
| 27               | 1                | -4.244667               | -1.653183 | -0.962848 |
| 28               | 1                | -5.257312               | -1.294293 | 0.446001  |
| 29               | 1                | -2.391980               | 1.593575  | -0.282877 |
| 30               | 1                | 1.246469                | -0.497637 | -1.091625 |
| 31               | 6                | -0.608915               | -0.214633 | 1.819445  |
| 32               | 1                | 0.095956                | 0.373506  | 2.403879  |

|    |   |           |           |           |
|----|---|-----------|-----------|-----------|
| 33 | 1 | -1.543148 | 0.359938  | 1.659009  |
| 34 | 1 | -0.936855 | -1.094686 | 2.388218  |
| 35 | 1 | 1.461406  | 1.522983  | 1.228111  |
| 36 | 1 | 1.029643  | 1.865798  | -0.437884 |
| 37 | 6 | 5.426805  | 0.608052  | -0.634904 |
| 38 | 1 | 6.105635  | 0.307847  | 0.172880  |
| 39 | 1 | 5.694104  | 0.005427  | -1.512274 |
| 40 | 1 | 5.621208  | 1.656976  | -0.871568 |

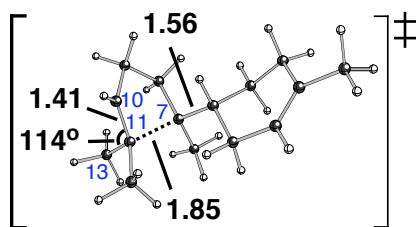

**TS (A2-to-C1)**  
**25.29 [19.87]**

**B3LYP/6-31+G(d,p)//B3LYP/6-31+G(d,p)**

HF = -586.3762553 hartrees (-367951.10020075 kcal/mol)

Imaginary Frequencies: 1 (-343.5780 1/cm)

Zero-point correction = 0.364926 (Hartree/Particle)

Sum of electronic and thermal Free Energies = -367754.2147 kcal/mol (298 Kelvin, 1.0 atm)

**B3LYP/6-31+G(d,p)//B3LYP/6-31+G(d,p):CPCM (solvent=benzene, radii=uaks)**

HF = -586.4120675 hartrees (-367979.436476925 kcal/mol)

**mPW1PW91/6-31+G(d,p)//B3LYP/6-31+G(d,p)**

HF = -586.245441 hartrees (-367869.0142275 kcal/mol)

**mPWB1K/6-31+G(d,p)//B3LYP/6-31+G(d,p)**

HF = -586.0350867 hartrees

Coordinates:

| Center Number | Atomic Number | Coordinates (Angstroms) |           |          |
|---------------|---------------|-------------------------|-----------|----------|
|               |               | X                       | Y         | Z        |
| 1             | 6             | 0.431135                | -0.182510 | 0.062263 |
| 2             | 6             | -1.235507               | -0.284191 | 2.014827 |
| 3             | 1             | -2.241088               | -0.546441 | 2.342898 |
| 4             | 1             | -0.550365               | -0.979996 | 2.512831 |
| 5             | 1             | -0.991384               | 0.717710  | 2.377228 |



|    |   |           |           |           |
|----|---|-----------|-----------|-----------|
| 6  | 6 | -1.038559 | -0.433575 | 0.515604  |
| 7  | 6 | -1.583800 | -1.768629 | -0.080097 |
| 8  | 6 | -2.257720 | 0.695836  | -0.292908 |
| 9  | 6 | -1.976478 | -1.423543 | -1.531557 |
| 10 | 1 | -2.432276 | -2.136536 | 0.498107  |
| 11 | 1 | -0.828150 | -2.554761 | -0.049509 |
| 12 | 6 | -2.073950 | 0.049934  | -1.536801 |
| 13 | 1 | -1.236407 | -1.744181 | -2.274507 |
| 14 | 1 | -2.925192 | -1.869514 | -1.878123 |
| 15 | 6 | 1.015960  | 1.228749  | 0.292215  |
| 16 | 6 | 1.402886  | -1.192504 | 0.733821  |
| 17 | 6 | 2.495867  | 1.291452  | -0.016261 |
| 18 | 6 | 2.763814  | -1.174681 | 0.025682  |
| 19 | 6 | 3.297614  | 0.227365  | -0.168896 |
| 20 | 1 | 0.482706  | -0.372258 | -1.021091 |
| 21 | 1 | 1.007179  | -2.212830 | 0.736406  |
| 22 | 1 | 1.551372  | -0.904643 | 1.780711  |
| 23 | 1 | 3.479977  | -1.759833 | 0.616958  |
| 24 | 1 | 2.701654  | -1.686428 | -0.947117 |
| 25 | 1 | 2.908755  | 2.291506  | -0.134423 |
| 26 | 1 | 0.514221  | 1.962420  | -0.342850 |
| 27 | 1 | 0.837240  | 1.551986  | 1.328314  |
| 28 | 6 | 4.754250  | 0.349650  | -0.529909 |
| 29 | 1 | 5.048132  | 1.390778  | -0.686053 |
| 30 | 1 | 5.390609  | -0.071886 | 0.258320  |
| 31 | 1 | 4.979770  | -0.208979 | -1.447526 |
| 32 | 6 | -2.034428 | 2.207150  | -0.253632 |
| 33 | 1 | -1.679382 | 2.518659  | 0.732187  |
| 34 | 1 | -1.316584 | 2.552156  | -0.999097 |
| 35 | 1 | -2.981290 | 2.726451  | -0.432479 |
| 36 | 6 | -3.624771 | 0.367822  | 0.397627  |
| 37 | 1 | -3.629593 | 0.830179  | 1.385490  |
| 38 | 1 | -4.414282 | 0.834569  | -0.196708 |
| 39 | 1 | -3.847352 | -0.692370 | 0.492995  |
| 40 | 1 | -1.846143 | 0.614292  | -2.444836 |

---

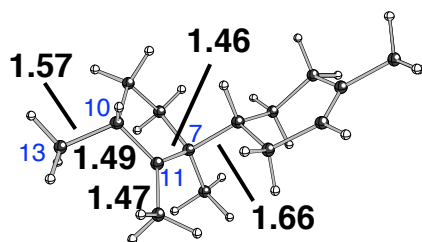

**C1**  
**-3.72 [-10.02]**

**B3LYP/6-31+G(d,p)//B3LYP/6-31+G(d,p)**

HF = -586.4236978 hartrees (-367980.8703695 kcal/mol)

Imaginary Frequencies: none

Zero-point correction = 0.366143 (Hartree/Particle)

Sum of electronic and thermal Free Energies = -367783.5878 kcal/mol (298 Kelvin, 1.0 atm)

**mPW1PW91/6-31+G(d,p)//B3LYP/6-31+G(d,p)**

HF = -586.2942943 hartrees (-367899.66967325 kcal/mol)

**mPWB1K/6-31+G(d,p)//B3LYP/6-31+G(d,p)**

HF = -586.0842133 hartrees

Coordinates:

| -----  |        |                         |           |           |
|--------|--------|-------------------------|-----------|-----------|
| Center | Atomic | Coordinates (Angstroms) |           |           |
| Number | Number | X                       | Y         | Z         |
| -----  |        |                         |           |           |
| 1      | 6      | 0.502222                | -0.170589 | 0.080975  |
| 2      | 6      | -0.969004               | -0.398333 | 2.259853  |
| 3      | 1      | -1.984098               | -0.416333 | 2.668651  |
| 4      | 1      | -0.455483               | -1.290095 | 2.623706  |
| 5      | 1      | -0.450939               | 0.474601  | 2.664142  |
| 6      | 6      | -1.008551               | -0.414388 | 0.722695  |
| 7      | 6      | -1.591353               | -1.714896 | 0.093119  |
| 8      | 6      | -1.805787               | 0.639571  | 0.100687  |
| 9      | 6      | -2.068034               | -1.297266 | -1.312167 |
| 10     | 1      | -2.433696               | -2.055564 | 0.706410  |
| 11     | 1      | -0.863489               | -2.527868 | 0.075670  |
| 12     | 6      | -2.480218               | 0.186035  | -1.144016 |
| 13     | 1      | -1.266201               | -1.393455 | -2.049138 |
| 14     | 1      | -2.899771               | -1.909277 | -1.668236 |
| 15     | 6      | -2.019674               | 1.977543  | 0.666196  |
| 16     | 1      | -2.907461               | 1.878104  | 1.318501  |
| 17     | 1      | -1.209468               | 2.307920  | 1.317239  |
| 18     | 1      | -2.265627               | 2.730175  | -0.086790 |

|    |   |           |           |           |
|----|---|-----------|-----------|-----------|
| 19 | 6 | -4.027863 | 0.381171  | -1.015363 |
| 20 | 1 | -4.434913 | -0.210346 | -0.190489 |
| 21 | 1 | -4.299956 | 1.429242  | -0.873160 |
| 22 | 1 | -4.484255 | 0.031522  | -1.943824 |
| 23 | 6 | 1.067848  | 1.255283  | 0.172804  |
| 24 | 6 | 1.494372  | -1.151449 | 0.734248  |
| 25 | 6 | 2.523059  | 1.304791  | -0.240481 |
| 26 | 6 | 2.804994  | -1.157245 | -0.070995 |
| 27 | 6 | 3.316555  | 0.232445  | -0.378984 |
| 28 | 1 | 0.409292  | -0.429768 | -0.977832 |
| 29 | 1 | 1.094264  | -2.167598 | 0.788655  |
| 30 | 1 | 1.705359  | -0.825813 | 1.758438  |
| 31 | 1 | 3.560301  | -1.708490 | 0.504316  |
| 32 | 1 | 2.681249  | -1.721462 | -1.007444 |
| 33 | 1 | 2.919649  | 2.297341  | -0.443547 |
| 34 | 1 | 0.504855  | 1.940449  | -0.475344 |
| 35 | 1 | 0.968388  | 1.651300  | 1.195471  |
| 36 | 6 | 4.745614  | 0.333517  | -0.841975 |
| 37 | 1 | 5.023074  | 1.362599  | -1.083359 |
| 38 | 1 | 5.434213  | -0.036417 | -0.072182 |
| 39 | 1 | 4.911421  | -0.283034 | -1.734548 |
| 40 | 1 | -2.161786 | 0.835124  | -1.974884 |

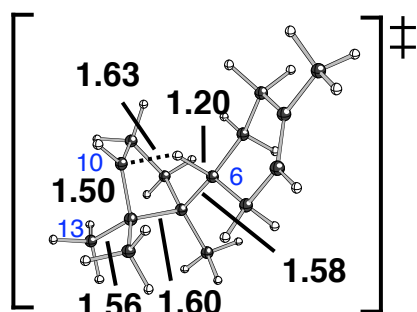

**TS (C1-to-E1)**  
**26.72 [17.80]**

**B3LYP/6-31+G(d,p)//B3LYP/6-31+G(d,p)**

HF = -586.3726072 hartrees (-367948.811018 kcal/mol)

Imaginary Frequencies: 1 (-303.7392 1/cm)

Zero-point correction = 0.363557 (Hartree/Particle)

Sum of electronic and thermal Free Energies = -367751.5779 kcal/mol (298 Kelvin, 1.0 atm)

**B3LYP/6-31+G(d,p)//B3LYP/6-31+G(d,p):CPCM (solvent=benzene, radii=uaks)**

HF = -586.4074442 hartrees (-367976.535309942 kcal/mol)

**mPW1PW91/6-31+G(d,p)//B3LYP/6-31+G(d,p)**

HF = -586.2473691 hartrees (-367870.22411025 kcal/mol)

**mPWB1K/6-31+G(d,p)//B3LYP/6-31+G(d,p)**

HF = -586.0390192 hartrees

Coordinates:

| Center<br>Number | Atomic<br>Number | Coordinates (Angstroms) |           |           |
|------------------|------------------|-------------------------|-----------|-----------|
|                  |                  | X                       | Y         | Z         |
| 1                | 6                | -0.251328               | 0.069510  | 0.365562  |
| 2                | 6                | 1.640446                | -0.480474 | 2.106278  |
| 3                | 1                | 2.713399                | -0.380560 | 2.297449  |
| 4                | 1                | 1.119768                | 0.045561  | 2.913496  |
| 5                | 1                | 1.383383                | -1.540848 | 2.179452  |
| 6                | 6                | 1.284735                | 0.111548  | 0.749892  |
| 7                | 6                | 1.736232                | 1.590344  | 0.574078  |
| 8                | 6                | 1.945516                | -0.555961 | -0.542078 |
| 9                | 6                | 1.515159                | 1.822252  | -0.947458 |
| 10               | 1                | 2.782239                | 1.715833  | 0.856350  |
| 11               | 1                | 1.168150                | 2.282520  | 1.194806  |
| 12               | 6                | 1.312272                | 0.444565  | -1.465302 |
| 13               | 1                | 0.701800                | 2.504082  | -1.215666 |
| 14               | 1                | 2.403176                | 2.219393  | -1.467984 |
| 15               | 6                | 1.610961                | -2.016940 | -0.908790 |
| 16               | 1                | 2.276338                | -2.350958 | -1.710180 |
| 17               | 1                | 1.775057                | -2.682295 | -0.056906 |
| 18               | 1                | 0.590812                | -2.154642 | -1.268343 |
| 19               | 6                | 3.500240                | -0.434289 | -0.608098 |
| 20               | 1                | 3.921743                | -1.160382 | 0.093708  |
| 21               | 1                | 3.861009                | -0.699667 | -1.605780 |
| 22               | 1                | 3.891791                | 0.550415  | -0.356504 |
| 23               | 6                | -1.005316               | -1.228093 | 0.689501  |
| 24               | 6                | -1.170823               | 1.243716  | 0.716594  |
| 25               | 6                | -2.428702               | -1.257645 | 0.190734  |
| 26               | 6                | -2.495984               | 1.206713  | -0.069246 |
| 27               | 6                | -3.121609               | -0.166898 | -0.166726 |
| 28               | 1                | -0.155213               | 0.119771  | -0.832990 |
| 29               | 1                | -0.702356               | 2.217677  | 0.570132  |
| 30               | 1                | -1.379527               | 1.166351  | 1.793552  |
| 31               | 1                | -3.201389               | 1.899097  | 0.406410  |
| 32               | 1                | -2.344449               | 1.607879  | -1.083924 |
| 33               | 1                | -2.894232               | -2.238744 | 0.132917  |
| 34               | 1                | -0.475821               | -2.122872 | 0.370221  |
| 35               | 1                | -0.994467               | -1.276959 | 1.791758  |

|    |   |           |           |           |
|----|---|-----------|-----------|-----------|
| 36 | 6 | -4.531622 | -0.226531 | -0.688601 |
| 37 | 1 | -4.889557 | -1.255522 | -0.772722 |
| 38 | 1 | -5.215915 | 0.321517  | -0.029056 |
| 39 | 1 | -4.605387 | 0.243164  | -1.677771 |
| 40 | 1 | 1.028574  | 0.239291  | -2.500474 |

---

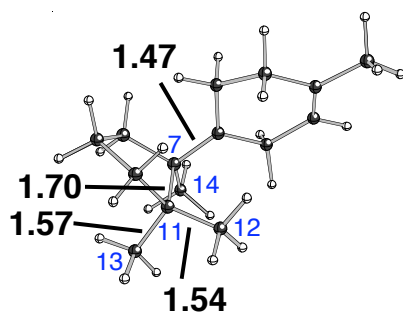

**E1**  
**-0.20 [-7.07]**

**B3LYP/6-31+G(d,p)//B3LYP/6-31+G(d,p)**

HF = -586.4181428 hartrees (-367977.384607 kcal/mol)

Imaginary Frequencies: none

Zero-point correction = 0.366199 (Hartree/Particle)

Sum of electronic and thermal Free Energies = -367779.2009 kcal/mol (298 Kelvin, 1.0 atm)

**mPW1PW91/6-31+G(d,p)//B3LYP/6-31+G(d,p)**

HF = -586.289635 hartrees (-367896.7459625 kcal/mol)

**mPWB1K/6-31+G(d,p)//B3LYP/6-31+G(d,p)**

HF = -586.0819359 hartrees

Coordinates:

---

| Center Number | Atomic Number | Coordinates (Angstroms) |           |           |
|---------------|---------------|-------------------------|-----------|-----------|
|               |               | X                       | Y         | Z         |
| 1             | 6             | 0.280553                | -0.272378 | -0.647829 |
| 2             | 6             | -1.596000               | -1.851705 | -1.134618 |
| 3             | 1             | -2.681273               | -1.912128 | -1.206448 |
| 4             | 1             | -1.195362               | -2.066356 | -2.131013 |
| 5             | 1             | -1.266398               | -2.644125 | -0.458368 |
| 6             | 6             | -1.175050               | -0.438270 | -0.681039 |
| 7             | 6             | -1.913941               | 0.687920  | -1.479739 |
| 8             | 6             | -1.683243               | -0.101731 | 0.907161  |

---

|    |   |           |           |           |
|----|---|-----------|-----------|-----------|
| 9  | 6 | -2.293128 | 1.841037  | -0.509930 |
| 10 | 1 | -2.809583 | 0.241990  | -1.918464 |
| 11 | 1 | -1.313187 | 1.033719  | -2.325993 |
| 12 | 6 | -1.777202 | 1.435354  | 0.884101  |
| 13 | 1 | -1.874096 | 2.800020  | -0.828864 |
| 14 | 1 | -3.377984 | 1.975084  | -0.497793 |
| 15 | 6 | -0.760587 | -0.630245 | 2.011180  |
| 16 | 1 | -1.203154 | -0.395971 | 2.984636  |
| 17 | 1 | -0.647311 | -1.718878 | 1.970993  |
| 18 | 1 | 0.236864  | -0.178187 | 1.992845  |
| 19 | 6 | -3.079975 | -0.722662 | 1.079437  |
| 20 | 1 | -3.053291 | -1.813946 | 1.108757  |
| 21 | 1 | -3.473062 | -0.380403 | 2.043306  |
| 22 | 1 | -3.788507 | -0.409952 | 0.308544  |
| 23 | 6 | 1.187418  | -1.432364 | -0.503407 |
| 24 | 6 | 0.957222  | 1.026282  | -0.848775 |
| 25 | 6 | 2.627486  | -1.150575 | -0.165377 |
| 26 | 6 | 2.197815  | 1.272638  | 0.038434  |
| 27 | 6 | 3.107033  | 0.068004  | 0.119534  |
| 28 | 1 | -0.797119 | 1.878468  | 1.091097  |
| 29 | 1 | 0.276472  | 1.875010  | -0.857139 |
| 30 | 1 | 1.324222  | 0.917103  | -1.891886 |
| 31 | 1 | 2.738156  | 2.127805  | -0.380864 |
| 32 | 1 | 1.888510  | 1.583864  | 1.046186  |
| 33 | 1 | 3.273028  | -2.022988 | -0.114398 |
| 34 | 1 | 0.745912  | -2.168924 | 0.181330  |
| 35 | 1 | 1.109361  | -1.951924 | -1.481524 |
| 36 | 6 | 4.527087  | 0.314875  | 0.546712  |
| 37 | 1 | 5.094080  | -0.615465 | 0.624483  |
| 38 | 1 | 5.040274  | 0.974023  | -0.163917 |
| 39 | 1 | 4.557685  | 0.816955  | 1.521925  |
| 40 | 1 | -2.437168 | 1.778126  | 1.687495  |

-----

### III. IRC plots

*Following structures correspond to the structure at the last point from the forward and reverse IRC calculations.*

#### **Figure 1a.**

**TS (A1'-to-D')**

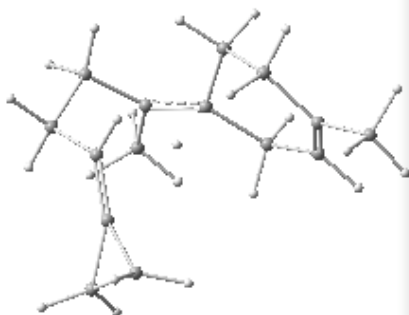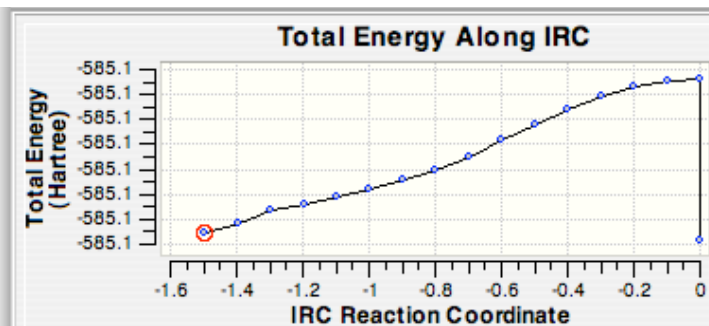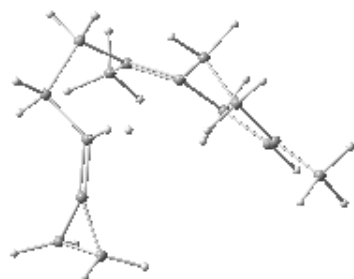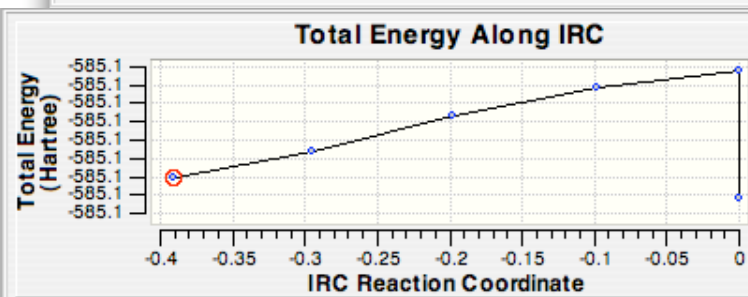

### TS (D'-to-E1')

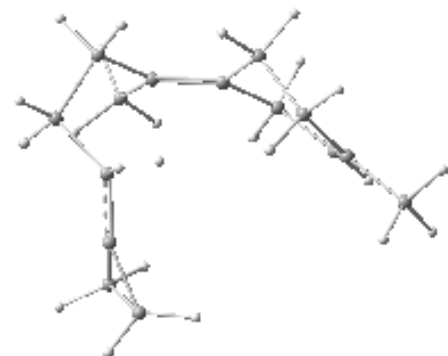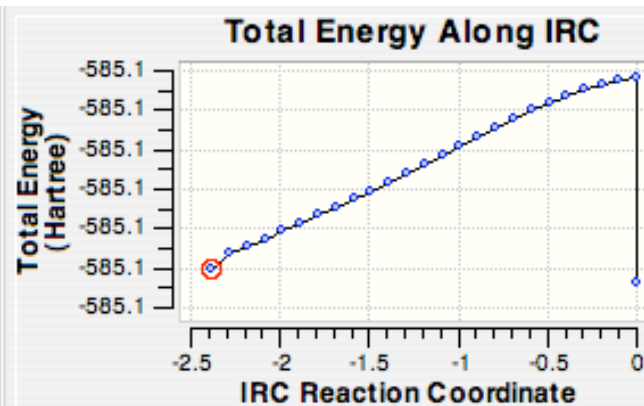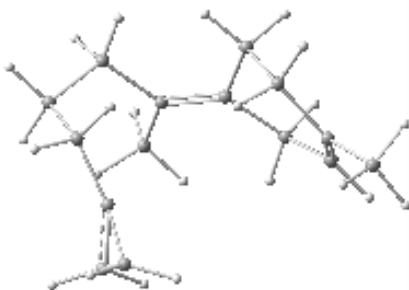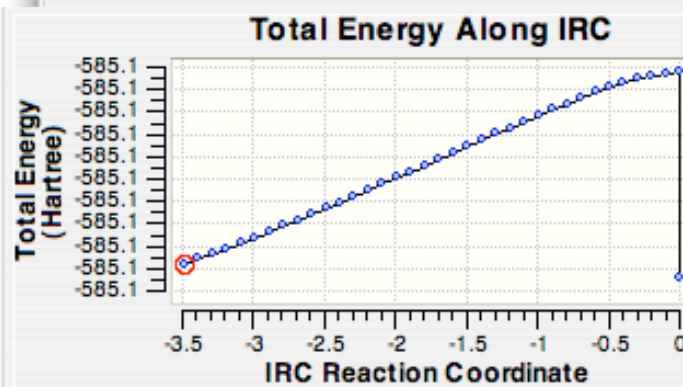

### TS (E1'-to-E2')

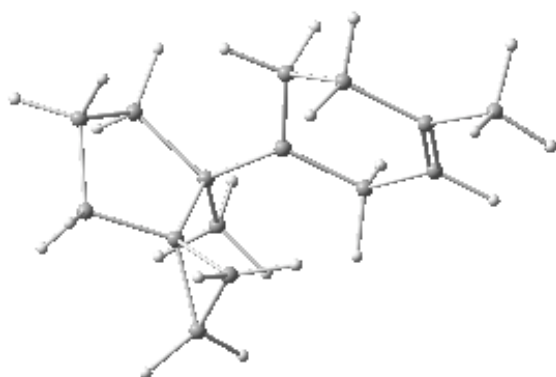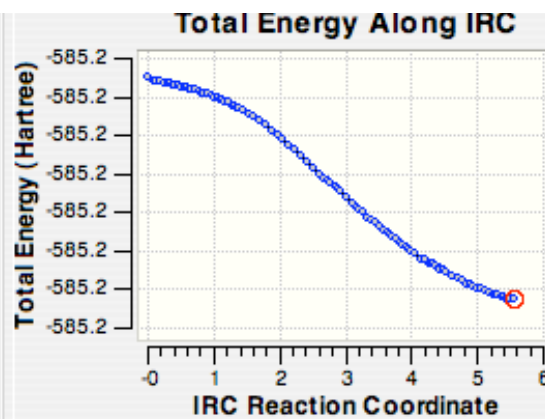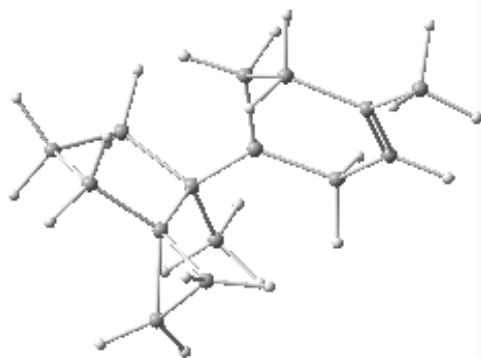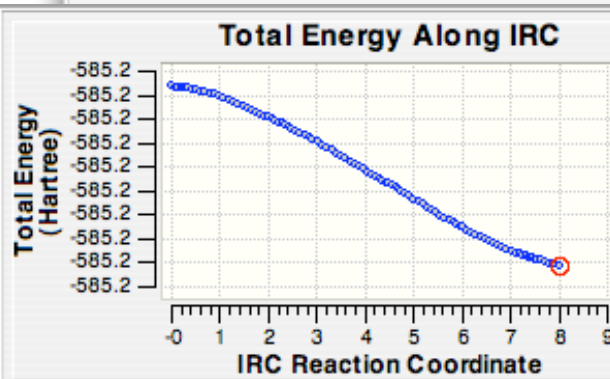

TS (E2'-to-E3')

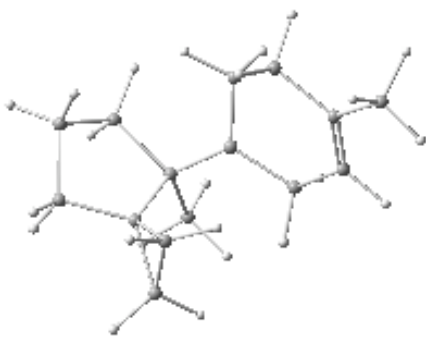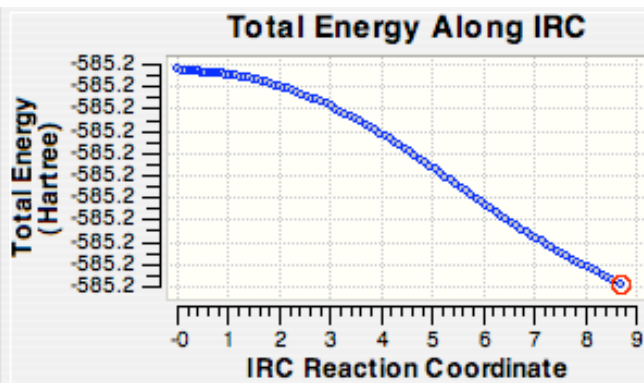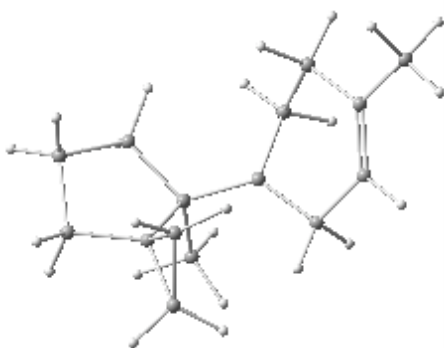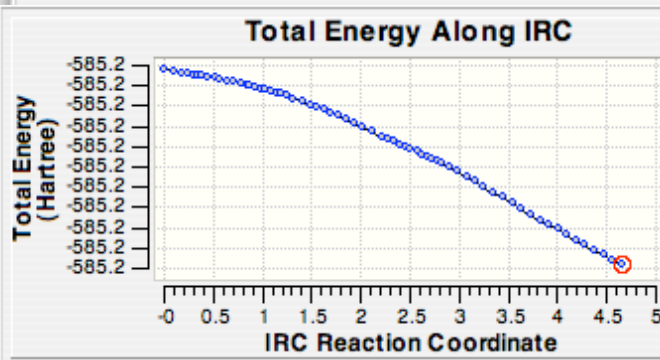

TS (E3'-to-F')



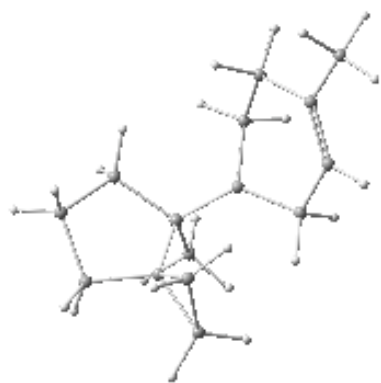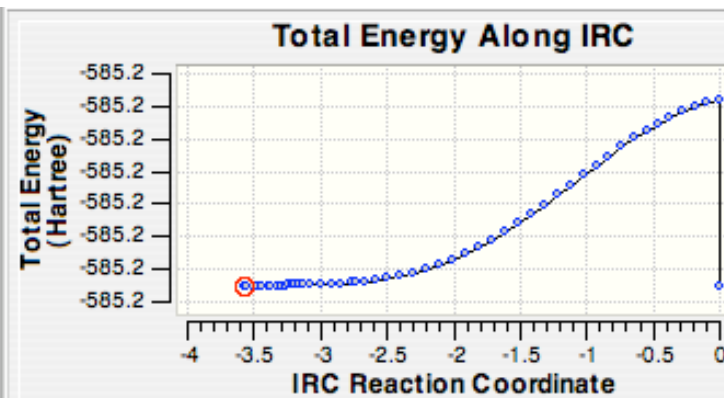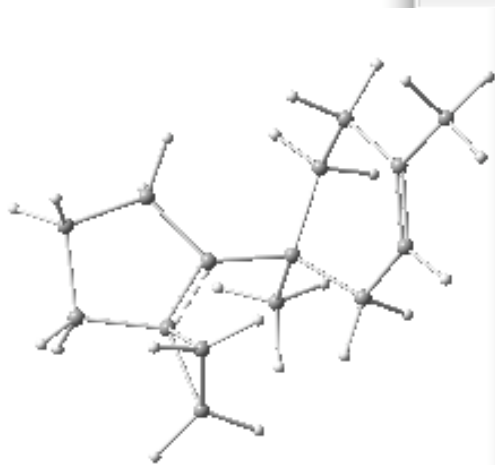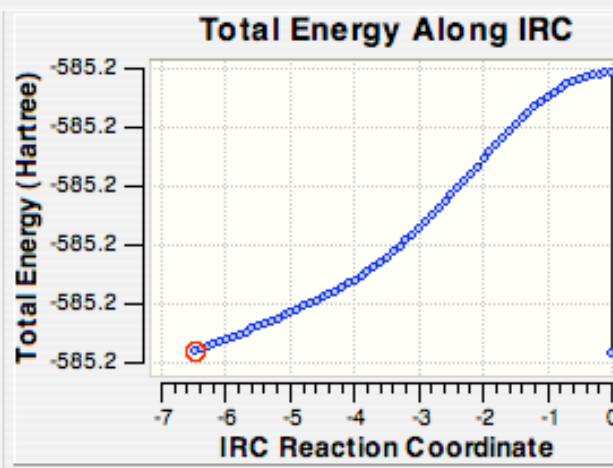

**TS (D'-to-K)**

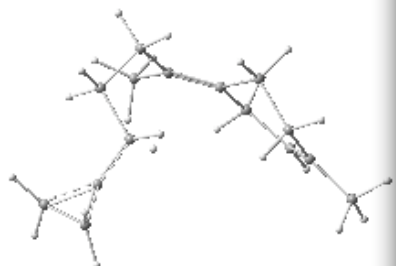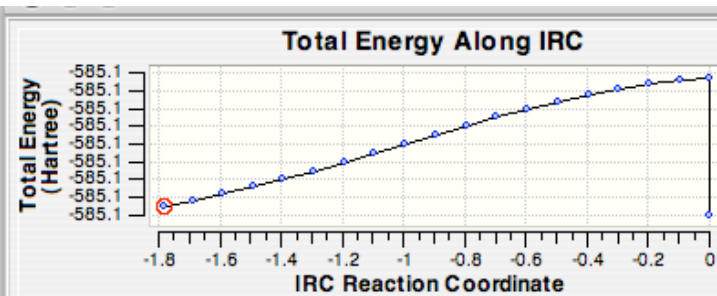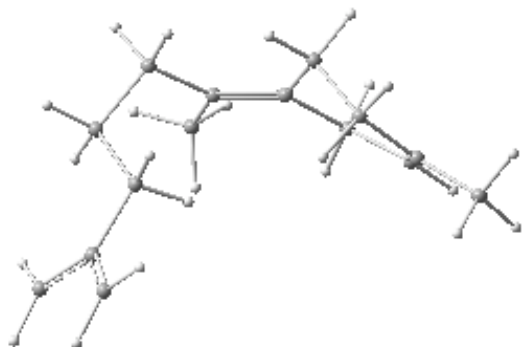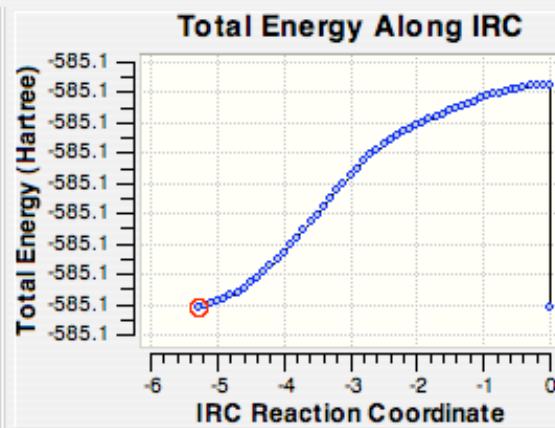

### TS (E1'-to-H')

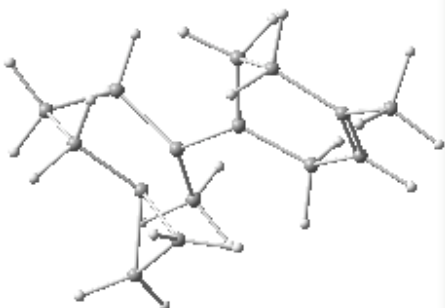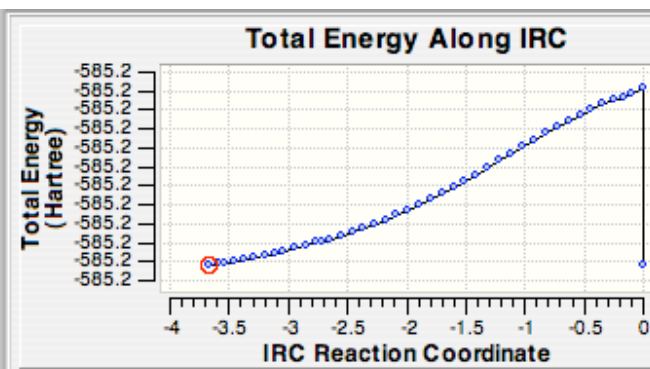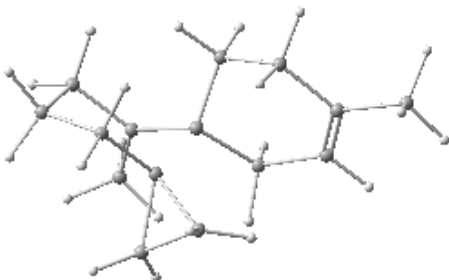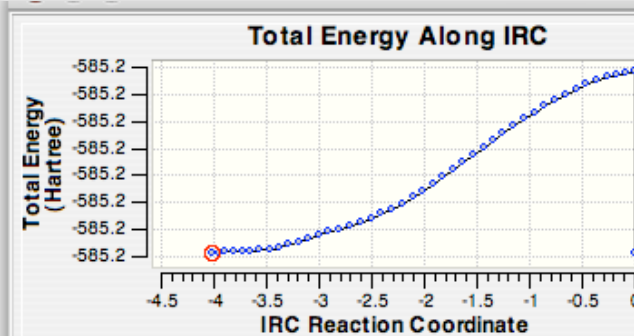

**Figure 1b.**

**TS (A1'-to-A2')**

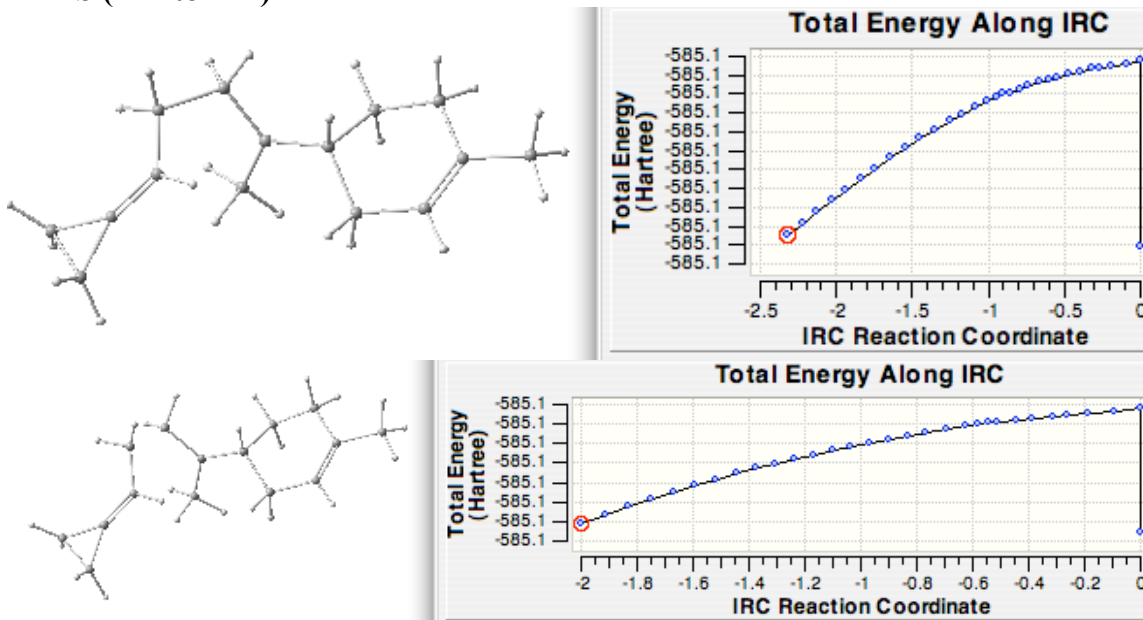

**TS (C'-to-J)**

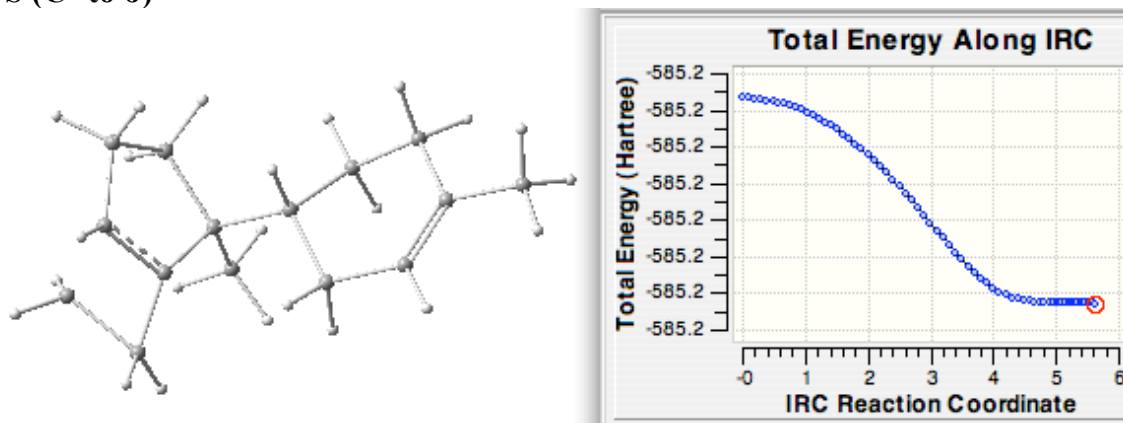

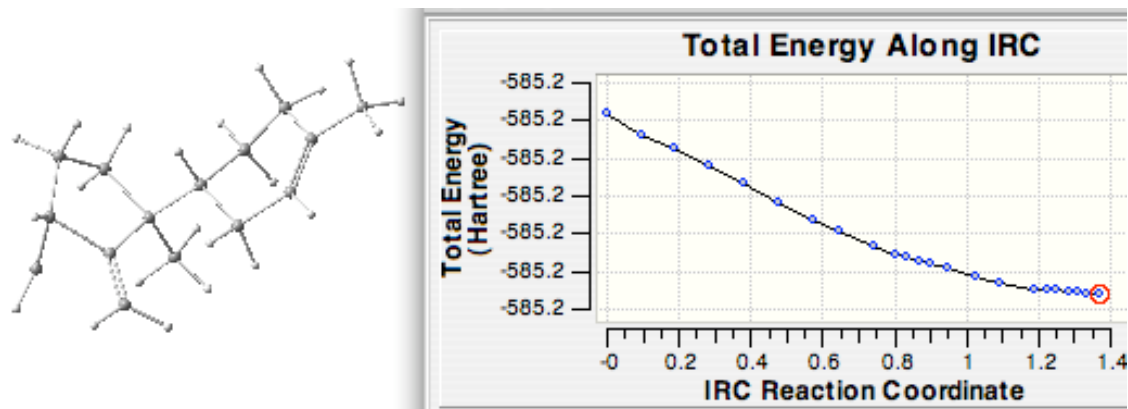

**Figure 2a.**

**TS (A1-to-D1)**

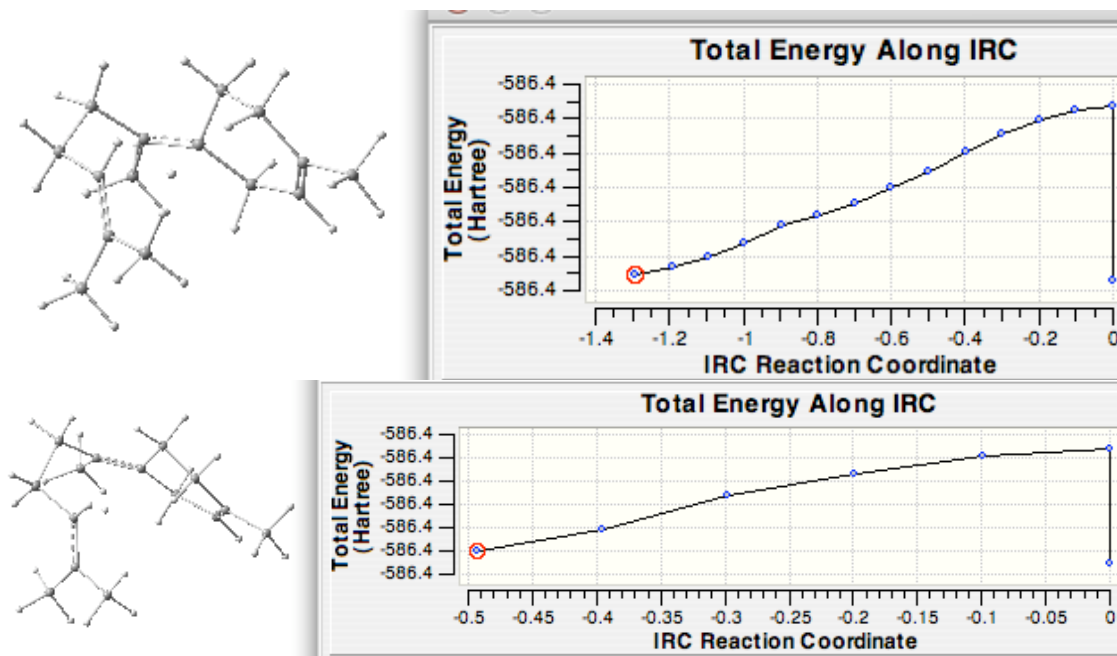

**TS (D1-to-D2)**

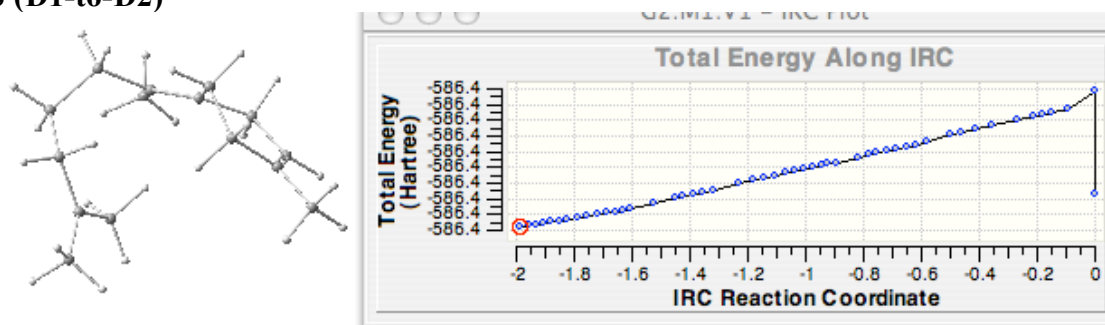

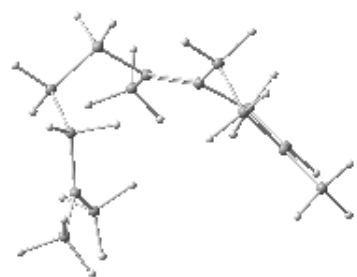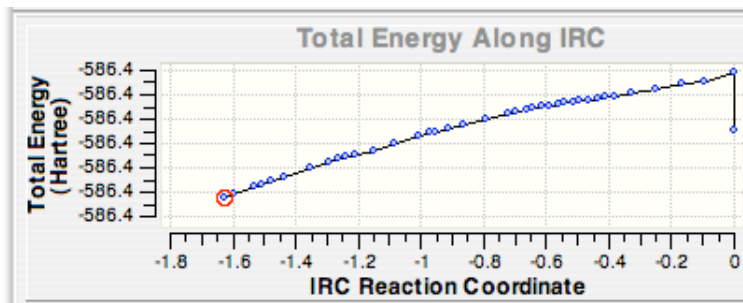

### TS (D2-to-D3)

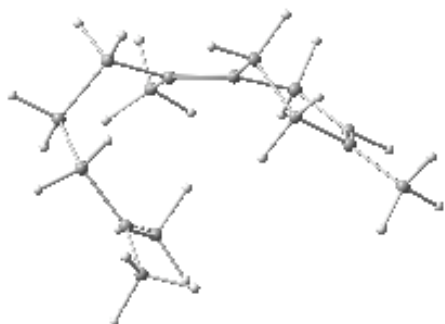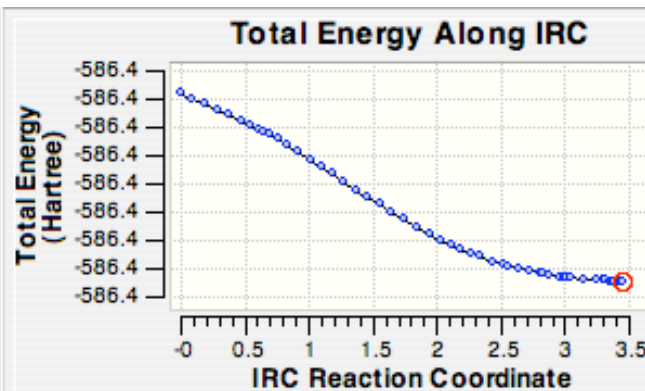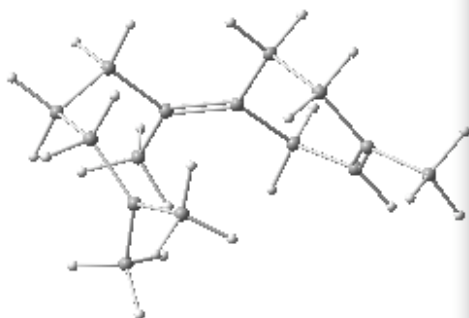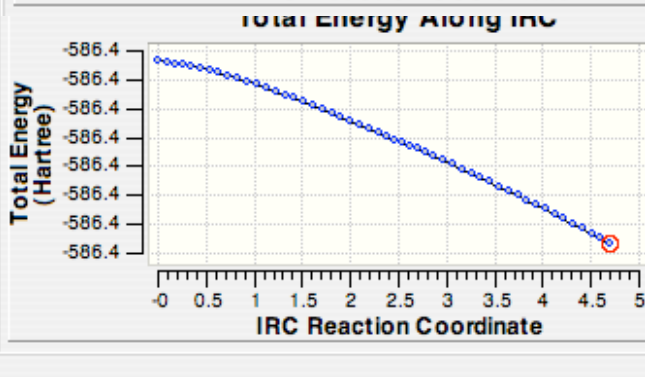

### TS (D3-to-E1)

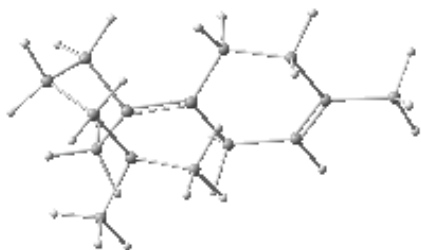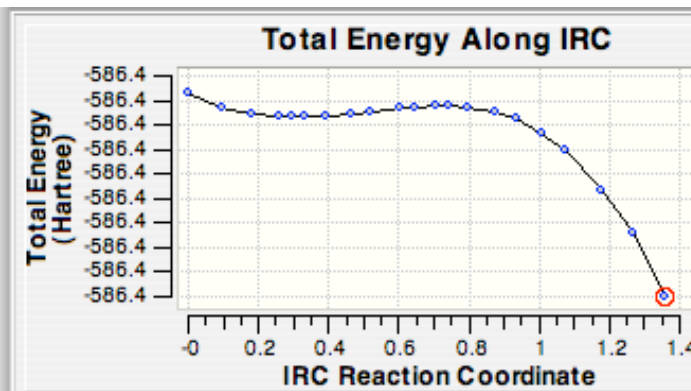

additional point calculations

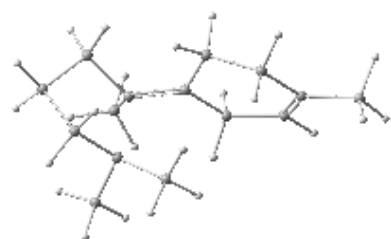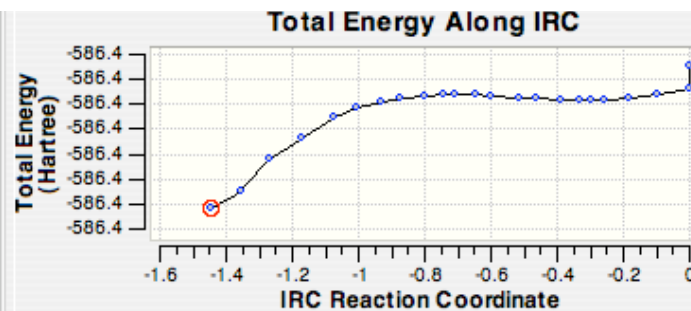

additional point calculations

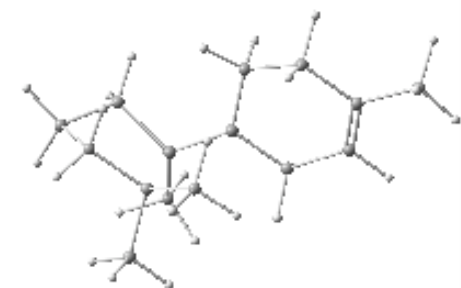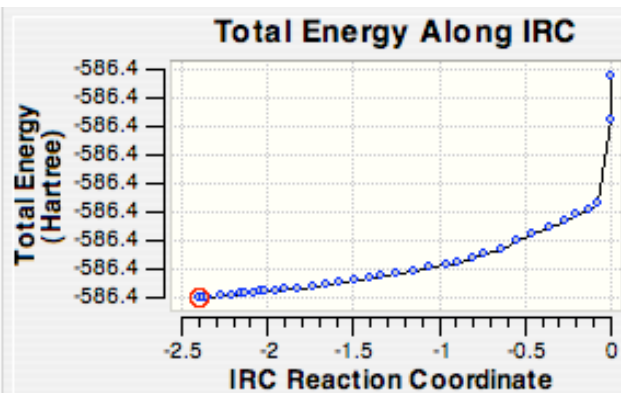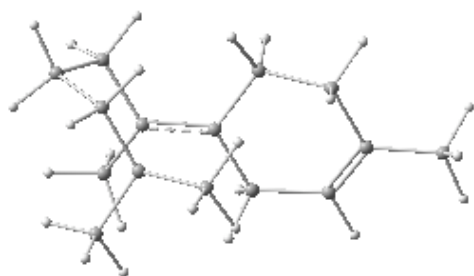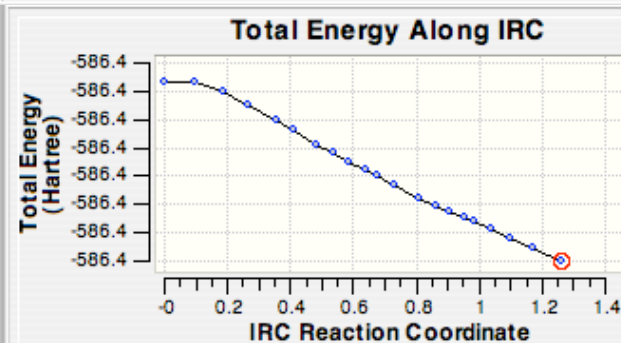

**Figure 2b.**

TS (A1-to-A2)

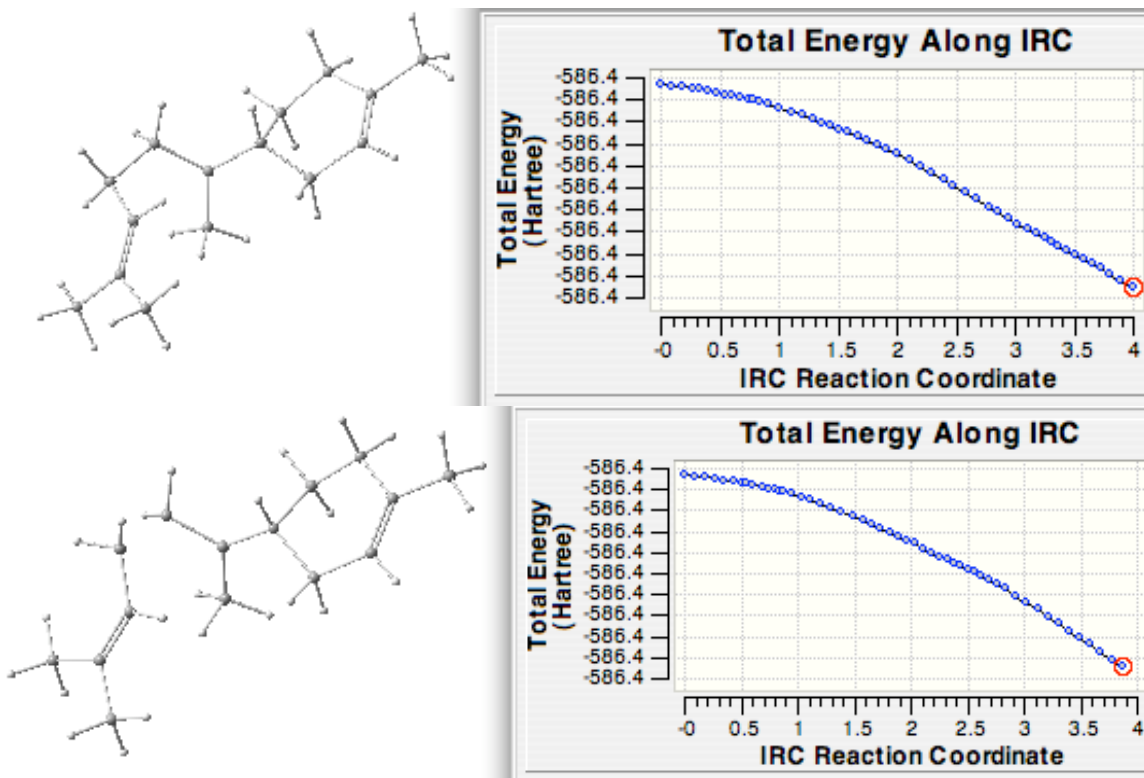

**TS (A2-to-C1)**

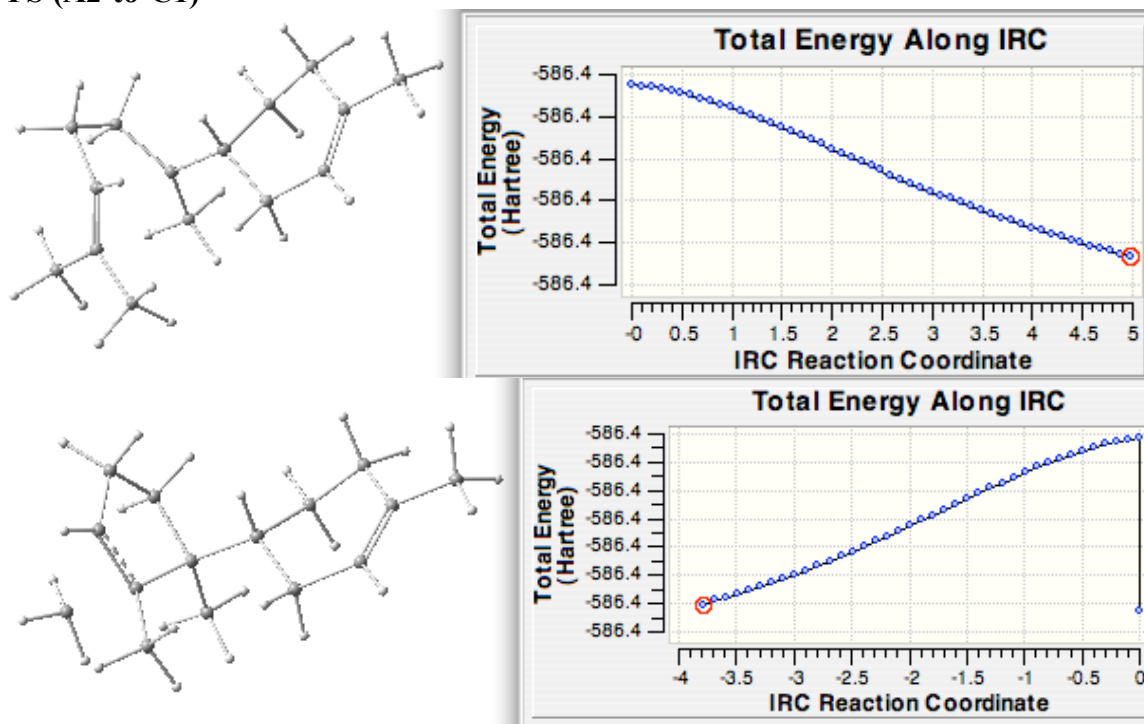

**TS (C1-to-E1)**



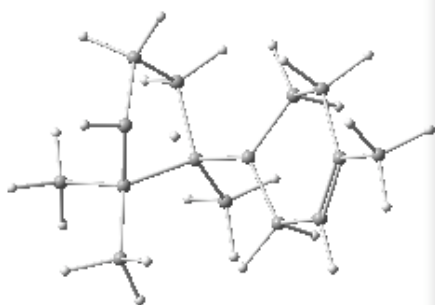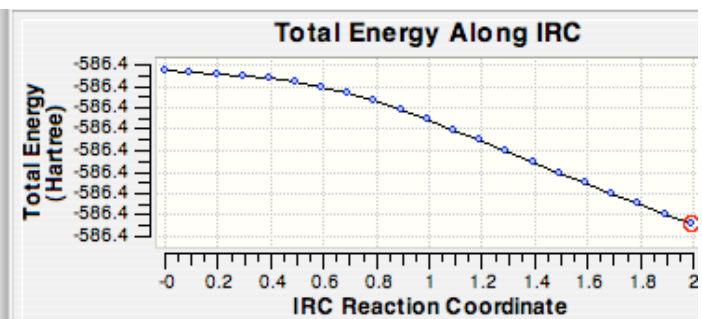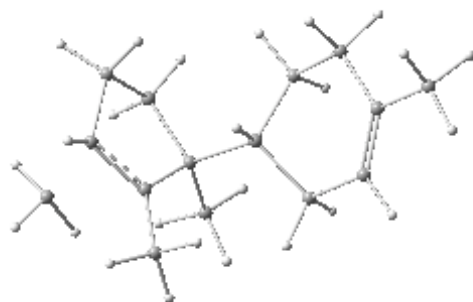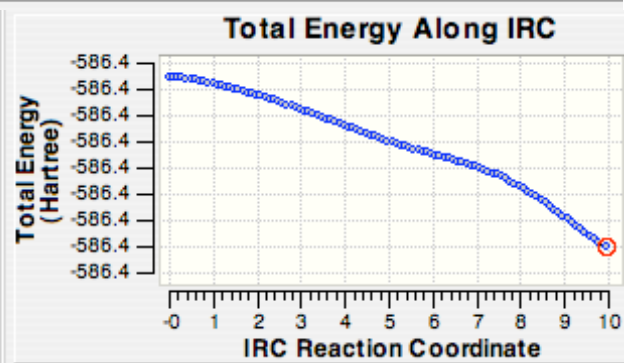

#### IV. Reaction Energetics



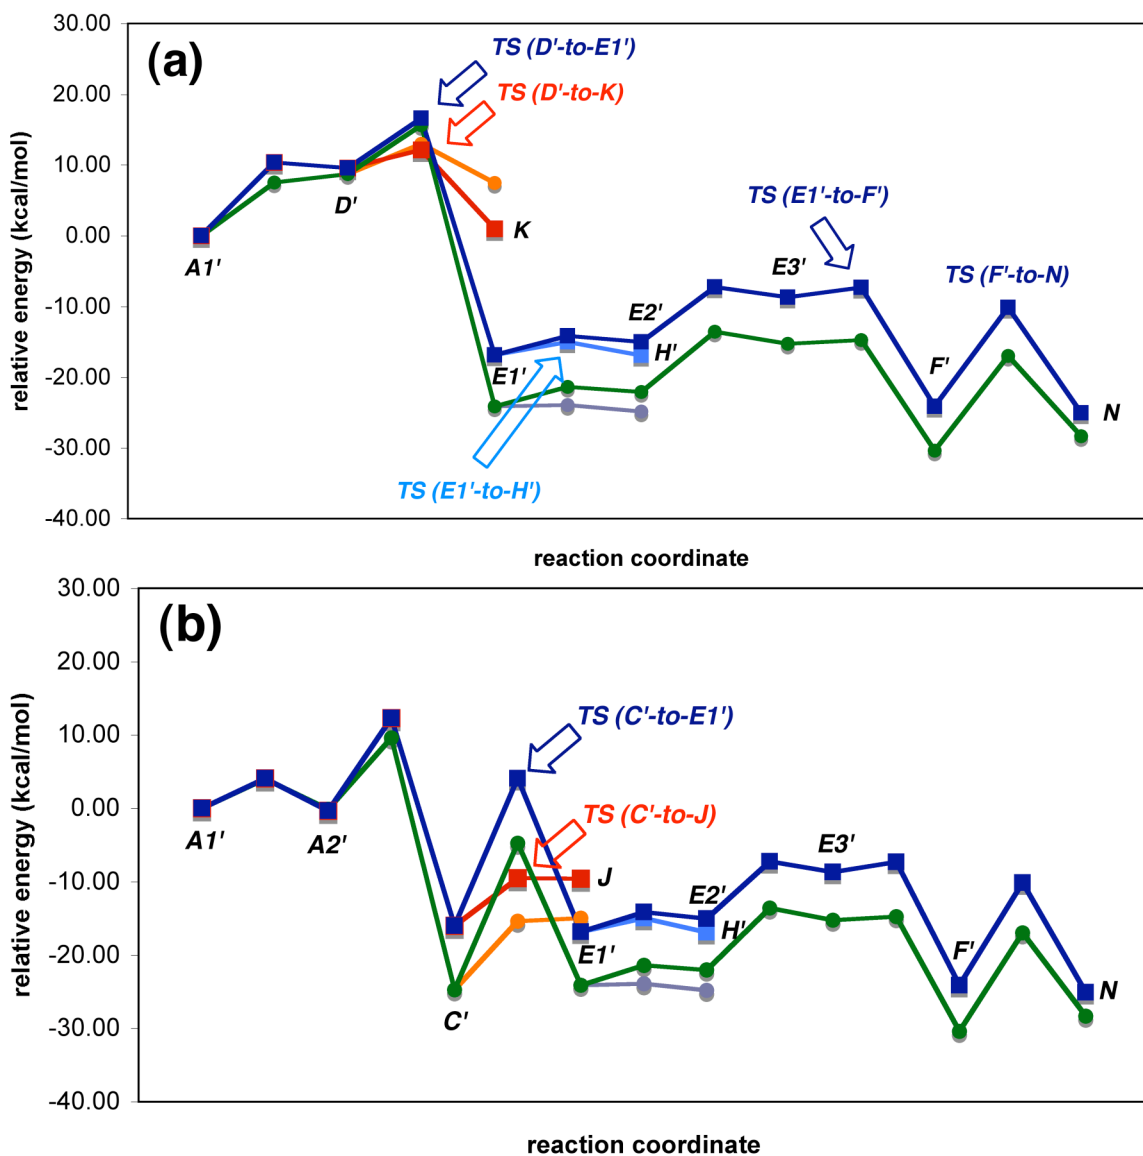

**Figure S1.** Overall energetics for the rearrangement of bisabolylyl cation analog **A'**: (a) the proton transfer, (b) the hydride transfer pathway. B3LYP/6-31+G(d,p)//B3LYP/6-31+G(d,p):  $\blacksquare$ ,  $\square$  and  $\blacksquare$ ; mPW1PW91/6-31+G(d,p)//B3LYP/6-31+G(d,p):  $\bullet$ ,  $\bullet$  and  $\bullet$

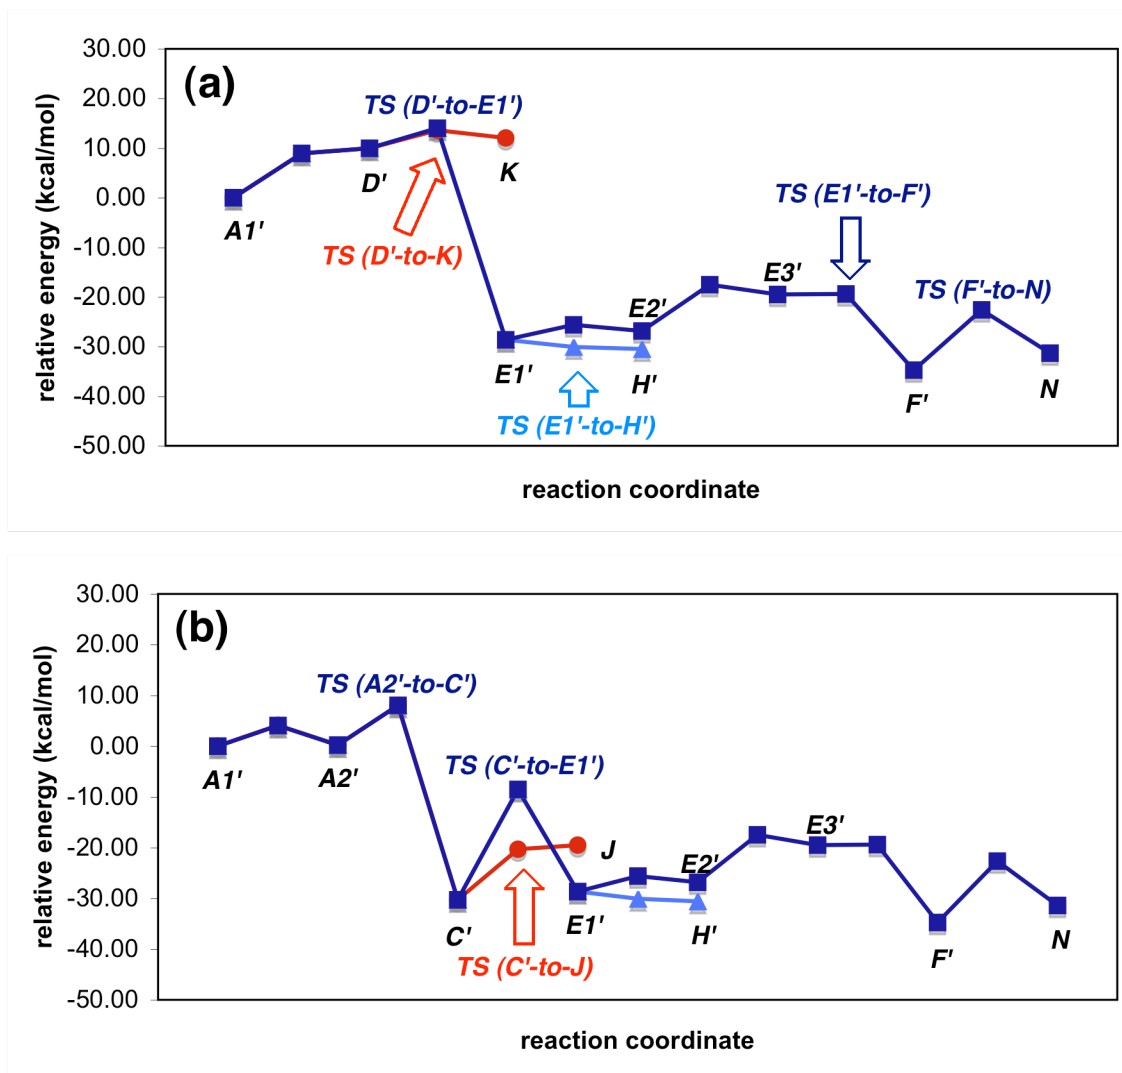

**Figure S2.** Overall energetics for the rearrangement of bisabolyl cation analog **A'**: (a) the proton transfer, (b) the hydride transfer pathway. mPWB1K/6-31+G(d,p)//B3LYP/6-31+G(d,p).

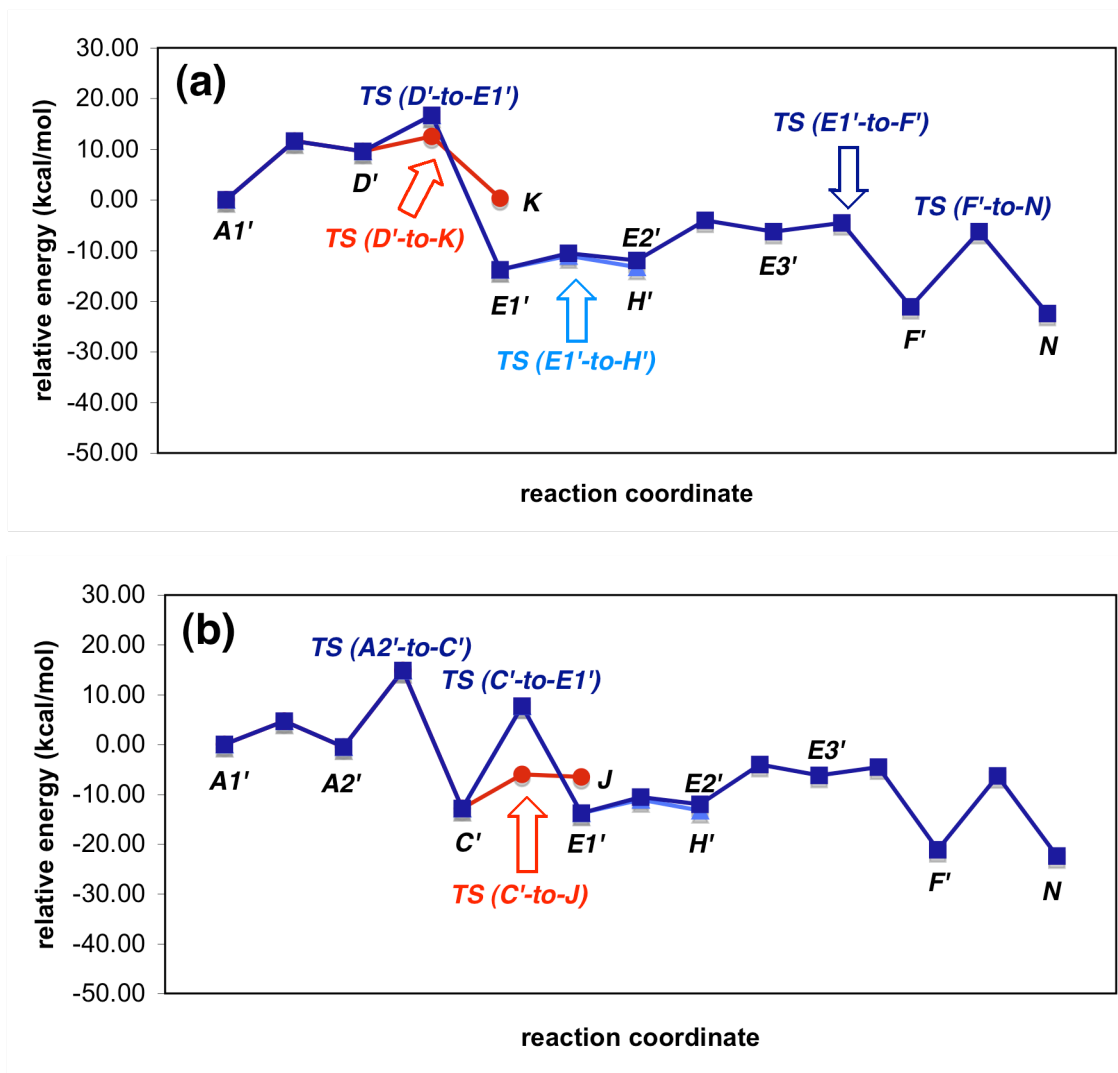

**Figure S3.** Overall energetics for the rearrangement of bisabolyl cation analog A': (a) the proton transfer, (b) the hydride transfer pathway. Free energy by B3LYP/6-31+G(d,p)//B3LYP/6-31+G(d,p), 298° K, 1.0 atm.

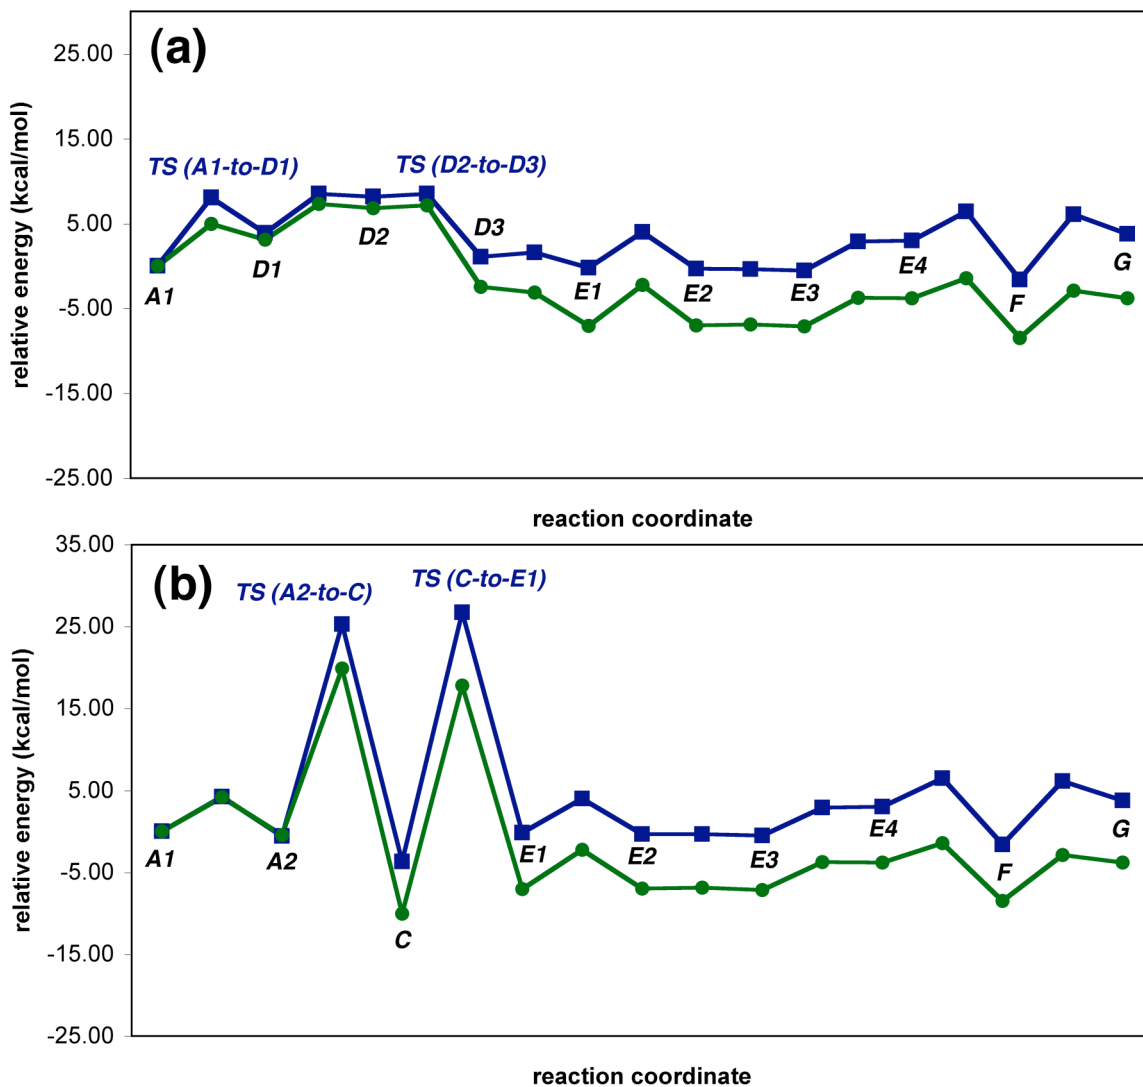

**Figure S4.** Overall energetics for the rearrangement of the bisabolyll cation: (a) the proton transfer, (b) the hydride transfer pathway. B3LYP/6-31+G(d,p)//B3LYP/6-31+G(d,p): ■ ; mPW1PW91/6-31+G(d,p)//B3LYP/6-31+G(d,p): ●

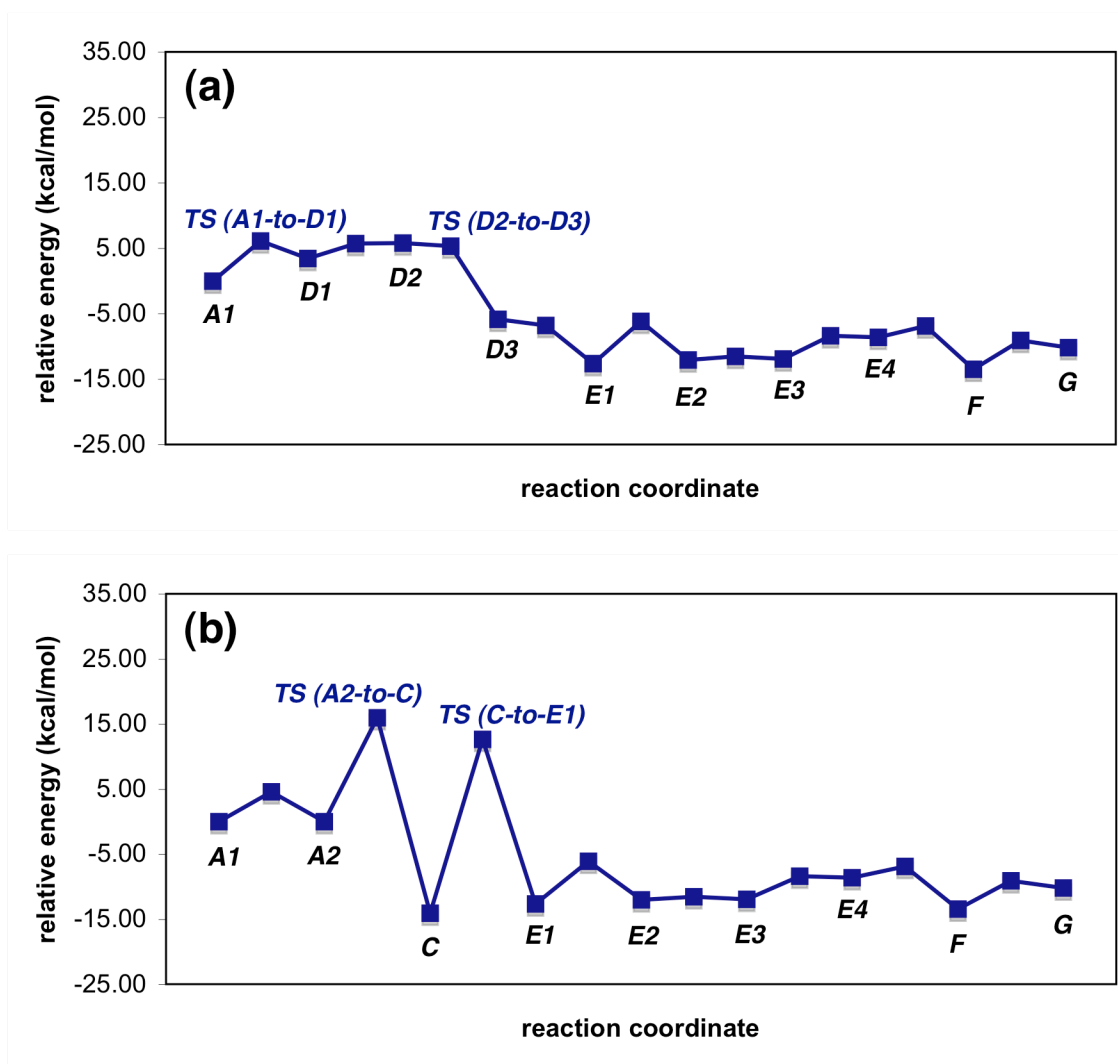

**Figure S5.** Overall energetics for the rearrangement of bisaboyl cation: (a) the proton transfer, (b) the hydride transfer pathway. mPWB1K/6-31+G(d,p)//B3LYP/6-31+G(d,p).

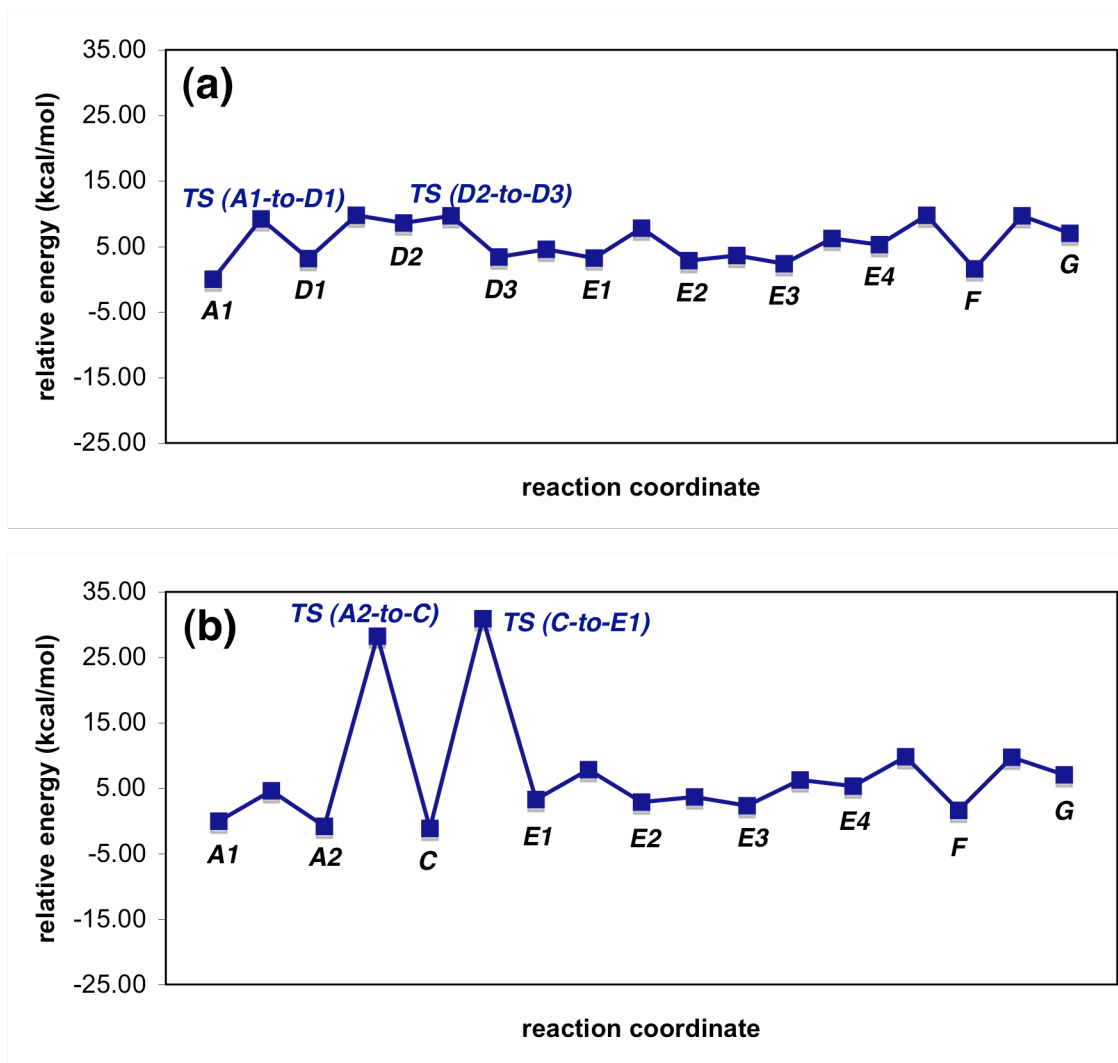

**Figure S6.** Overall energetics for the rearrangement of bisabolyl cation: (a) the proton transfer, (b) the hydride transfer pathway. Free energy by B3LYP/6-31+G(d,p)//B3LYP/6-31+G(d,p), 298° K, 1.0 atm.

#### IV. Solvation Calculations

Test calculations were performed on selected transition state structures shown in Figures 2 and 4 with CPCM (B3LYP/6-31+G(d,p)//B3LYP/6-31+G(d,p) with UAKS radii) using benzene as solvent (since the active sites of terpene synthases are largely hydrophobic and often lined with aromatic residues).

**Table S1.** Relative Energies (in kcal/mol)

| Transition structure  | CPCM <sup>a,b</sup> | CPCM <sup>a</sup> -ZPEcrxn <sup>a</sup> | B3LYP <sup>a</sup> | B3LYP-ZPEcrxn <sup>a</sup> | Free Energy <sup>d</sup> | mPW1PW91 <sup>a,b</sup> | mPW1PW91-ZPEcrxn <sup>a</sup> | mPWB1K <sup>a,b</sup> | mPWB1K-ZPEcrxn <sup>a</sup> |
|-----------------------|---------------------|-----------------------------------------|--------------------|----------------------------|--------------------------|-------------------------|-------------------------------|-----------------------|-----------------------------|
| <b>TS (A1'-to-D')</b> | 0.00                | 0.00                                    | 0.00               | 0.00                       | 0.00                     | 0.00                    | 0.00                          | 0.00                  | 0.00                        |
| <b>TS (D'-to-E1')</b> | 4.24                | 3.36                                    | 5.42               | 6.30                       | 5.16                     | 7.24                    | 8.11                          | 4.17                  | 5.05                        |
| <b>TS (A2'-to-C')</b> | -2.67               | 1.23                                    | -1.94              | 1.96                       | 3.23                     | -1.78                   | 2.11                          | -4.83                 | -0.93                       |
| <b>TS (C'-to-E1')</b> | -8.35               | -5.38                                   | -9.24              | -6.27                      | -3.83                    | -15.21                  | -12.25                        | -20.41                | -17.44                      |
| <b>TS (A1-to-D1)</b>  | 0.00                | 0.00                                    | 0.00               | 0.00                       | 0.00                     | 0.00                    | 0.00                          | 0.00                  | 0.00                        |
| <b>TS (D2-to-D3)</b>  | -1.51               | -3.17                                   | -1.18              | 0.48                       | 0.47                     | 2.22                    | 0.57                          | -2.46                 | -0.80                       |
| <b>TS (A2-to-C1)</b>  | 11.4                | 15.44                                   | 13.2               | 17.24                      | 19.01                    | 14.91                   | 10.87                         | 5.79                  | 9.83                        |
| <b>TS (C1-to-E1)</b>  | 14.31               | 17.48                                   | 15.49              | 18.67                      | 21.65                    | 12.84                   | 9.66                          | 3.33                  | 6.5                         |

<sup>a</sup> These energies do not include zero-point energy corrections.

<sup>b</sup> B3LYP/6-31+G(d,p)//B3LYP/6-31+G(d,p), solvent=benzene, radii=uaks.

<sup>c</sup> These energies include unscaled zero-point energy corrections from B3LYP/6-31+G(d,p) frequency calculations.

<sup>d</sup> These free energies are from B3LYP/6-31+G(d,p)//B3LYP/6-31+G(d,p) calculations.

<sup>e</sup> These energies are from single point calculations on the B3LYP/6-31+G(d,p) optimized geometries.
